# Supplementary material for: Establishing a sentinel surveillance system for the novel COVID-19 in a resource-limited country: methods, system attributes and early findings
Source: PubMed Central journal article supplement — BMJ Open. 2021 Dec 2;11(12):e055169. doi: 10.1136/bmjopen-2021-055169 (PMC8640197; doi:10.1136/bmjopen-2021-055169), 2021-12-02
Supplement: bmjopen-2021-055169.draft_revisions.pdf [file bmjopen-2021-055169.draft_revisions.pdf]

# BMJ Open

BMJ Open is committed to open peer review. As part of this commitment we make the peer review history of every article we publish publicly available.

When an article is published we post the peer reviewers' comments and the authors' responses online. We also post the versions of the paper that were used during peer review. These are the versions that the peer review comments apply to.

The versions of the paper that follow are the versions that were submitted during the peer review process. They are not the versions of record or the final published versions. They should not be cited or distributed as the published version of this manuscript.

BMJ Open is an open access journal and the full, final, typeset and author-corrected version of record of the manuscript is available on our site with no access controls, subscription charges or pay-per-view fees (<http://bmjopen.bmj.com>).

If you have any questions on BMJ Open's open peer review process please email [info.bmjopen@bmj.com](mailto:info.bmjopen@bmj.com)

# BMJ Open

## Establishing a sentinel surveillance system for the novel coronavirus disease 2019 (COVID-19) in a resource limited county: methods, system attributes and early findings

|                               |                                                                                                                                                                                                                                                                                                                                                                                                                                                                                                                                                                                                                                                                                                                                                                                                                                                                                                                                                                                                                                                                                                                                                                                        |
|-------------------------------|----------------------------------------------------------------------------------------------------------------------------------------------------------------------------------------------------------------------------------------------------------------------------------------------------------------------------------------------------------------------------------------------------------------------------------------------------------------------------------------------------------------------------------------------------------------------------------------------------------------------------------------------------------------------------------------------------------------------------------------------------------------------------------------------------------------------------------------------------------------------------------------------------------------------------------------------------------------------------------------------------------------------------------------------------------------------------------------------------------------------------------------------------------------------------------------|
| Journal:                      | <i>BMJ Open</i>                                                                                                                                                                                                                                                                                                                                                                                                                                                                                                                                                                                                                                                                                                                                                                                                                                                                                                                                                                                                                                                                                                                                                                        |
| Manuscript ID                 | bmjopen-2021-055169                                                                                                                                                                                                                                                                                                                                                                                                                                                                                                                                                                                                                                                                                                                                                                                                                                                                                                                                                                                                                                                                                                                                                                    |
| Article Type:                 | Original research                                                                                                                                                                                                                                                                                                                                                                                                                                                                                                                                                                                                                                                                                                                                                                                                                                                                                                                                                                                                                                                                                                                                                                      |
| Date Submitted by the Author: | 04-Jul-2021                                                                                                                                                                                                                                                                                                                                                                                                                                                                                                                                                                                                                                                                                                                                                                                                                                                                                                                                                                                                                                                                                                                                                                            |
| Complete List of Authors:     | Das, Pritimoy; International Centre for Diarrhoeal Disease Research Bangladesh<br>Akhtar, Zubair; International Centre for Diarrhoeal Disease Research Bangladesh<br>Mah-E-Muneer, Syeda ; International Centre for Diarrhoeal Disease Research Bangladesh<br>Islam, Md.; International Centre for Diarrhoeal Disease Research Bangladesh<br>Rahman, Mohammed; International Centre for Diarrhoeal Disease Research Bangladesh<br>Rahman, Mustafizur; International Centre for Diarrhoeal Disease Research Bangladesh<br>Rahman, Mahmudur; International Centre for Diarrhoeal Disease Research Bangladesh<br>Rahman , Mahbubur ; Institute of Epidemiology Disease Control and Research<br>Billah, Mallick; Institute of Epidemiology Disease Control and Research<br>Alamgir, A. S. M; Institute of Epidemiology Disease Control and Research<br>Flora, Meerjady Sabrina ; Institute of Epidemiology Disease Control and Research<br>Shirin, Tahmina; Institute of Epidemiology Disease Control and Research<br>Banu, Sayera; International Centre for Diarrhoeal Disease Research Bangladesh<br>Chowdhury, Fahmida; International Centre for Diarrhoeal Disease Research Bangladesh |
| Keywords:                     | COVID-19, Epidemiology < TROPICAL MEDICINE, Public health < INFECTIOUS DISEASES, Diagnostic microbiology < INFECTIOUS DISEASES                                                                                                                                                                                                                                                                                                                                                                                                                                                                                                                                                                                                                                                                                                                                                                                                                                                                                                                                                                                                                                                         |
|                               |                                                                                                                                                                                                                                                                                                                                                                                                                                                                                                                                                                                                                                                                                                                                                                                                                                                                                                                                                                                                                                                                                                                                                                                        |

SCHOLARONE™  
Manuscripts

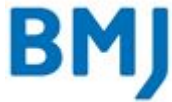

I, the Submitting Author has the right to grant and does grant on behalf of all authors of the Work (as defined in the below author licence), an exclusive licence and/or a non-exclusive licence for contributions from authors who are: i) UK Crown employees; ii) where BMJ has agreed a CC-BY licence shall apply, and/or iii) in accordance with the terms applicable for US Federal Government officers or employees acting as part of their official duties; on a worldwide, perpetual, irrevocable, royalty-free basis to BMJ Publishing Group Ltd ("BMJ") its licensees and where the relevant Journal is co-owned by BMJ to the co-owners of the Journal, to publish the Work in this journal and any other BMJ products and to exploit all rights, as set out in our [licence](#).

The Submitting Author accepts and understands that any supply made under these terms is made by BMJ to the Submitting Author unless you are acting as an employee on behalf of your employer or a postgraduate student of an affiliated institution which is paying any applicable article publishing charge ("APC") for Open Access articles. Where the Submitting Author wishes to make the Work available on an Open Access basis (and intends to pay the relevant APC), the terms of reuse of such Open Access shall be governed by a Creative Commons licence – details of these licences and which [Creative Commons](#) licence will apply to this Work are set out in our licence referred to above.

Other than as permitted in any relevant BMJ Author's Self Archiving Policies, I confirm this Work has not been accepted for publication elsewhere, is not being considered for publication elsewhere and does not duplicate material already published. I confirm all authors consent to publication of this Work and authorise the granting of this licence.

# Establishing a sentinel surveillance system for the novel coronavirus disease 2019 (COVID-19) in a resource limited county: methods, system attributes and early findings

Pritimoy Das<sup>1, †</sup>, Zubair Akhtar<sup>1</sup>, Syeda Mah-E-Muneer<sup>1</sup>, Md Ariful Islam<sup>1</sup>, Mohammed Ziaur Rahman<sup>1</sup>, Mustafizur Rahman<sup>1</sup>, Mahmudur Rahman<sup>1</sup>, Mahbubur Rahman<sup>2</sup>, Mallick Masum Billah<sup>2</sup>, ASM Alamgir<sup>2</sup>, Meerjady Sabrina Flora<sup>2</sup>, Tahmina Shirin<sup>2</sup>, Sayera Banu<sup>1</sup>, Fahmida Chowdhury<sup>1</sup>

<sup>1</sup>Infectious Diseases Division, International Centre for Diarrhoeal Disease Research, Bangladesh (icddr,b), Dhaka, Bangladesh

<sup>2</sup>Institute of Epidemiology, Disease Control and Research (IEDCR), Dhaka, Bangladesh

†Correspondence to Pritimoy Das; [pritimoydas@gmail.com](mailto:pritimoydas@gmail.com)

## ABSTRACT

**Introduction:** icddr,b, and Institute of Epidemiology, Disease Control and Research

(IEDCR), Government of Bangladesh, established a hospital-based surveillance platform for screening suspected COVID-19 patients to understand the COVID-19 situation in different regions where nearby testing facility (reverse transcription polymerase chain reaction, RT-PCR) was unavailable.

**Methods:** We conducted the surveillance at three secondary level public hospitals and one tertiary level private hospital in different regions, enrolled suspected COVID-19 patients with any of the symptoms within the last 7 days- fever, cough, sore throat, and respiratory distress. Surveillance staff recorded clinical and epidemiological data, collected and transported nasopharyngeal swabs to icddr,b, Dhaka for SARS-CoV-2 test using RT-PCR. Findings were reported to the authorities over email and the patients over short message service within 36 hours. Study staff followed up all patients after 30 days for the outcome of the illness over the telephone.

**Results:** From 10<sup>th</sup> June to 31<sup>st</sup> August 2020, COVID-19 was detected in 39% (922/2345) enrolled patients. It was more common in outpatients with a peak positivity in July (54%).

1  
2  
3 The median age of the confirmed COVID-19 cases was 38 years (IQR: 30-50), 71% were  
4 male, and 9% were healthcare workers. Among them, cough (67%) was the most common  
5 symptom, followed by fever (53%). Diabetic patients were more likely to get COVID-19 than  
6 non-diabetic (48% vs. 38%,  $p < 0.05$ ). The death rate among COVID-19 positive was 2.3%  
7 (21/922). Death was associated with age  $\geq 60$  years (OR:13.5; 95% CI: 5.4-33), shortness of  
8 breath (OR:14.4; 95% CI: 4.8-43), co-morbidity (OR:13.9; 95% CI: 3.2-60), smoking history  
9 (OR: 3.9, 95% CI: 1.5-9.8), attending to hospital in  $< 2$  days due to critical illness (OR: 5.4;  
10 95% CI: 1.8-17) and hospital admission (OR:13.3; 95% CI: 5.3-33).  
11  
12  
13  
14  
15  
16  
17  
18  
19  
20

21 **Conclusion:** This surveillance strengthened government's capacity for rapid case detection,  
22 reporting, and quick containment efforts by taking data-driven effective strategy.  
23  
24  
25  
26  
27  
28  
29  
30

31 **Key words:** COVID-19, SARS-CoV-2, hospital based study, sentinel surveillance,  
32 Bangladesh  
33  
34  
35  
36  
37  
38  
39  
40  
41  
42  
43  
44  
45  
46  
47  
48  
49  
50  
51  
52  
53  
54  
55  
56  
57  
58  
59  
60

## Strengths and limitations of this study

- For the first time in the country, in collaboration with a government public health institution and an international research organization, we implemented a sentinel surveillance for COVID-19 in resource-constrained settings.
- This is a multicentre study with representative hospitals included from almost all major administrative regions of Bangladesh to ensure spatial distribution.
- More COVID-19 deaths were captured by the unique 30 days follow-up strategy compared to recorded in-hospital deaths (72% vs. 28%).
- We were unable to get data from the COVID-19 patients who did not go to the hospitals but remained in the community, thus community burden was not estimated.
- The true prevalence of COVID-19 patients could be higher than reported in our study as we did not screen any asymptomatic patients.

only

## Introduction

Starting from its inception at Wuhan, Hubei Province, China, the novel coronavirus named severe acute respiratory syndrome coronavirus-2 (SARS-CoV-2) has spread across the world within a few months, causing Coronavirus Disease 2019 (COVID-19)<sup>1</sup>. Globally, 129,651,305 cases and 2.8 million deaths were recorded till 31<sup>th</sup> March 2021<sup>2</sup>. This virus manifests various clinical characteristics, from asymptomatic infection to severe pneumonia, vasculitis, and death<sup>3-6</sup>. It was declared a public health emergency of international concern (PHEIC) by the world health organization (WHO) in 30<sup>th</sup> January 2020 and subsequently a pandemic on 11<sup>th</sup> March 2020<sup>7</sup>. During that early stage of this coronavirus disease, there was uncertainty and variation regarding the epidemiological, clinical, and virological characteristics of this novel infectious disease. Though COVID-19 cases were reported from 198 countries or regions, and over 400,000 people were confirmed to be infected globally (24<sup>th</sup> March 2020)<sup>8</sup>, it's transmission dynamics within the human population was unclear, so WHO designed a protocol for the countries to investigate the COVID-19 outbreaks locally and emphasized COVID-19 surveillance to understand the country situation<sup>9</sup>.

Bangladesh, a country in Southeast Asia, exhibited different epidemiological features compared to other countries regarding the influenza virus in terms of seasonality, severity, and mortality<sup>10,11</sup>. On 8<sup>th</sup> March 2020, the first three cases of confirmed COVID-19 were reported in Bangladesh<sup>12</sup>, and subsequently, the number of confirmed cases and deaths increased: at the end of the first month, there were 51 confirmed cases with five deaths from COVID-19<sup>13</sup>. As COVID-19 was a novel virus, there was minimal information regarding its severity and magnitude in Bangladesh.

The government of Bangladesh (GoB) initiated several efforts for the early detection of the virus to mitigate the spread: screening of passengers at airports, land ports, and maritime ports; hotline system to notify any suspected case of COVID-19 to the Institute of

1  
2  
3 Epidemiology, Disease Control and Research (IEDCR) so that their specimens could be  
4 collected and tested. Moreover, passengers arriving from countries with COVID-19 outbreaks  
5 were screened at the point of entries (PoE) and monitored for any symptom onset for 14 days,  
6 considering the virus's incubation period recommended by the WHO. However, these efforts  
7 were not enough to detect COVID-19 patients, as asymptomatic COVID-19 carriers already  
8 unfolded in their community and spread the virus in different geographical locations across  
9 Bangladesh. Patients with COVID-19 symptoms were reported from different hospitals and  
10 needed to be tested for diagnosis and treatment purposes. Thus, as a part of the pandemic  
11 preparedness and responses, there was an immediate need to establish a hospital-based  
12 platform to screen suspected COVID-19 patients to support GoB in hospitals where PCR-  
13 based COVID-19 testing facility was not available. The GoB initiated a countrywide system  
14 for detecting COVID-19 cases by prioritizing divisional hospitals, medical college hospitals,  
15 and few specialized hospitals to screen and test for COVID-19. Moreover, there was a  
16 knowledge gap on clinical and epidemiological data of COVID-19 patients in Bangladesh  
17 during the initial phase of the pandemic from any sentinel sites involving multiple public and  
18 private hospitals across the country.

19  
20  
21  
22  
23  
24  
25  
26  
27  
28  
29  
30  
31  
32  
33  
34  
35  
36  
37  
38  
39  
40  
41 To support the containment efforts for COVID-19, International Centre for Diarrhoeal  
42 Disease Research, Bangladesh (icddr,b) and Institute of Epidemiology, Disease Control and  
43 Research (IEDCR) under the Bangladesh Ministry of Health and Family Welfare jointly  
44 conducted this surveillance in selected hospitals where there was no nearby PCR based  
45 COVID-19 testing facility. Moreover, these hospitals were prioritized by GoB considering  
46 the existing influenza surveillance platform to better understand the clinical and  
47 epidemiological characteristics of COVID-19 patients from the geographical, social, and  
48 demographic context of Bangladesh.



## Methods

### *Setting*

The surveillance was conducted at the outpatient department (OPD) and inpatient department (IPD) of four selected hospitals where patients sought healthcare with suspected COVID-19 symptoms. Selected hospitals were three public and one private hospital situated in different geographical locations across Bangladesh (**Figure 1**). These were three secondary level government hospitals (Sadar Hospital, Hobiganj, General Hospital, Potuakhali, District Hospital, Narshingdi) and one tertiary level private medical college hospital (Jahurul Islam Medical College hospital, Kishoregonj). To select these hospitals, we identified national Influenza surveillance/hospital-based Influenza surveillance sites, where there was no nearby polymerase chain reaction (PCR) test facility but a high load of potential suspected COVID-19 patients. It was considered that additional support to these hospitals would strengthen COVID-19 case identification and reporting at the national level.

### *Patient enrolment*

Within three months of the first COVID-19 case detection in the country, we deployed two trained staff in each selected hospital for screening suspected COVID-19 patients among all the patients attending the fever clinic at OPD and among all inpatients admitted into the specific wards (medicine ward, pediatric ward, intensive care unit (ICU) and COVID-19 isolation ward). They actively screened for suspected COVID-19 patients using a case definition applied by the GoB (patient with any one or more of the following symptoms within last 7 days- fever, cough, sore throat, and respiratory distress). Our surveillance staff at each hospital worked with hospital physicians to enroll suspected COVID-19 patients.

### *Data collection*

1  
2  
3 After obtaining written informed consent from those who met the suspected COVID-19 case  
4 definition, our staff collected data on socio-demographics, travel history, and clinical  
5 characteristics from them. Surveillance staff used proper personal protective equipment  
6 (PPE) during data and specimen collection. Field staff used tablet computers to collect data  
7 syncing with local icddr,b server using mobile internet. This system allowed real-time  
8 monitoring of the situation across all hospitals by the research team centrally from Dhaka  
9 city. After 30 days of enrollment, the surveillance team followed up with each enrolled  
10 patient through mobile phone calls to register the outcome of their illnesses and updated the  
11 database accordingly.  
12  
13  
14  
15  
16  
17  
18  
19  
20  
21  
22  
23

### 24 ***Specimen collection***

25  
26 Our field staff collected nasopharyngeal (NP) swabs from the enrolled patients. They  
27 collected the specimens into the virus transportation medium (VTM) and stored in a cool box  
28 at 2-4 degree °C temperature. Every evening, a porter transported all collected VTMs to  
29 icddr,b, Dhaka.  
30  
31  
32  
33  
34  
35  
36

### 37 ***Laboratory testing***

38  
39 Nasopharyngeal swabs were tested for SARS-CoV-2 at the Virology Laboratory of icddr,b.  
40 RNA was extracted from nasopharyngeal swab using QiaAmp Viral RNA Mini kit (Qiagen,  
41 Hilden, Germany). RNA was tested for SARS-CoV-2 by real-time reverse transcription  
42 polymerase chain reaction (rRT-PCR) targeting SARS-CoV-2 specific ORF1ab- and N-gene.  
43  
44  
45  
46  
47  
48 Any person with an rRT-PCR positive test result was defined as a laboratory-confirmed  
49 COVID-19 case/patient.  
50  
51  
52  
53

### 54 ***Reporting to IEDCR, surveillance hospitals, and patients***

55  
56 We received the laboratory test results on the following day of specimen collection. Our  
57 research team then shared the results with respective hospital authorities, district civil  
58  
59  
60

1  
2  
3 surgeons, divisional health directors, and the director of IEDCR over email. Moreover, we  
4 sent a text message (Short Message Service- SMS) to each enrolled patient informing their  
5 test report within 36 hours of specimen collection. Our investigators also responded to every  
6 query when any COVID-19 positive patient called them over the telephone upon getting the  
7 test result. The respective health care facilities then managed the patients following the  
8 existing government system.  
9

### 17 ***Data analysis***

20 The data management and analysis were performed using the software Stata v.13 (Stata Corp  
21 LP, College Station, TX, USA). We summarized all categorical variables using frequency  
22 and percentage. We also summarized using mean and standard deviation (SD) for  
23 symmetrically distributed variables and median and interquartile range (IQR) for  
24 asymmetrically distributed variables. We performed Pearson's  $\chi^2$  test to compare the  
25 categorical variables and considered  $p < 0.05$  as statistically significant. We used univariate  
26 regression analysis for the interpretation of the outcome variable.  
27  
28  
29  
30  
31  
32  
33  
34  
35  
36

### 37 ***Ethical consideration***

39 The protocol was reviewed and approved by the institutional review boards (IRB; Research  
40 Review Committee and Ethical Review Committee) of the International Centre for  
41 Diarrhoeal Disease Research, Bangladesh (icddr,b). We obtained written, informed consent  
42 of the participants before enrollment.  
43  
44  
45  
46  
47  
48

### 49 ***Patient and public involvement***

51 It was not appropriate to involve patients or the public in the design, or conduct, or reporting,  
52 or dissemination plans of our study.  
53  
54  
55  
56

## 57 **Results**

58 During 10<sup>th</sup> June to 31<sup>st</sup> August 2020, we enrolled 2,345 suspected COVID-19 patients from  
59  
60

1  
2  
3 four selected hospitals; of them, 922 (39.3%) were laboratory-confirmed COVID-19 patients.  
4  
5 The median age of the confirmed COVID-19 patients was 38 years (Interquartile range, IQR:  
6  
7 30-50 years), and 71% were male. COVID-19 was mostly detected among patients aged  
8  
9 between 21-40 years (51.3%). About half of the COVID-19 positive patients (50.7%) had a  
10  
11 higher level of education (>12 years). We identified 13% of the patients meeting surveillance  
12  
13 case definition were healthcare workers (HCW), and they constituted 9% of all confirmed  
14  
15 COVID-19 patients (**Table 1**). Over the three months of the surveillance period, the peak of  
16  
17 the COVID-19 positivity among suspected COVID-19 patients was detected in the 24<sup>th</sup> and  
18  
19 25<sup>th</sup> epi weeks (2<sup>nd</sup> and 3<sup>rd</sup> week of July 2020). The proportion of test positivity over time  
20  
21 dropped and gradually started declining from the epi week 28<sup>th</sup> (2<sup>nd</sup> week of August) (**Figure**  
22  
23 **2 A**). We observed a relatively hard-to-reach riverside area (Patuakhali hospital) reporting the  
24  
25 highest number and proportion of cases (355/793; 45%) compared to other hospitals in  
26  
27 Narshingdi (313/796; 39%), Kishoreganj (144/462; 31%), and Habiganj (110/294; 37%),  
28  
29 (**Figure 1 and Figure 2 B**). Most of the patients meeting the suspected COVID-19 case  
30  
31 definition (91%) were identified from the outpatient departments of all the surveillance  
32  
33 hospitals, and of them, 40% were COVID-19 positive. In contrast, among all patients  
34  
35 enrolled from the inpatient departments, 28% were found COVID-19 positive.  
36  
37  
38  
39  
40  
41  
42

43 The presenting clinical features in all suspected COVID-19 patients varied from dry cough  
44  
45 (most common, 67%) to rash (least common, 0.4%), (**Figure 3A**). We found fever  $\geq 38^{\circ}$  C  
46  
47 (53% vs. 44%), loss of taste (41% vs. 30%), headache (33% vs. 27%), fatigue (30% vs. 21%),  
48  
49 loss of smell (23% vs. 13%), nausea/vomiting (18% vs. 15%) and joint pain (13% vs. 9%)  
50  
51 were more likely to be the presenting clinical features among COVID-19 positive patients  
52  
53 compared to the negative patients (all  $p < 0.05$ ). On the other hand, though sore throat was a  
54  
55 very common feature among suspected COVID-19 patients, it was less common in the  
56  
57 COVID-19 positive patients than COVID-19 negative patients (38% vs. 45%,  $p = 0.002$ )  
58  
59  
60

1  
2  
3 (Figure 3A). Besides, shortness of breath (47% vs. 22%) and vomiting (29% vs. 7%) were  
4  
5 more common clinical characteristics of COVID-19 positive patients admitted in the  
6  
7 hospitals compared to COVID-19 patients who attended at outpatients (Figure 3B).

8  
9  
10 However, fever (54% vs. 40%), sore throat (41% vs. 9%), runny nose (24% vs. 7%), loss of  
11  
12 smell (24% vs. 9%) and joint pain (14% vs. 2%) were more common clinical symptoms in  
13  
14 COVID-19 patients at OPD compared to COVID-19 patients at IPD (All p values <0.05).

15  
16  
17 Compared to COVID-19 negative patients, patients with co-morbidities reported more  
18  
19 infection with SARS-CoV-2, such as for chronic liver disease (51% vs. 39%), cardiovascular  
20  
21 disease (43% vs. 39%), and diabetes (48% vs. 38%). Of these co-morbidities, diabetic  
22  
23 patients showed significantly high susceptibility ( $p < 0.05$ ) of getting infected than non-  
24  
25 diabetic patients (Figure 3C). Other than these co-morbidities, we also found 19 cancer  
26  
27 patients meeting enrolment criteria; of them, four patients (21%) were COVID-19 positive;  
28  
29 and among positive, one (25%) died.

30  
31  
32  
33  
34  
35 Among the 922 laboratory-confirmed COVID-19 patients, 21 (2.3%) patients were dead from  
36  
37 our routine follow-up after a month of enrolment. Of them, 76% (16/21) patients died at the  
38  
39 same enrolment hospital or different hospitals, 24% (5/21) patients died at home or on the  
40  
41 way to the hospital. From the onset of symptoms, 43% (9/21) of patients died within 7 days,  
42  
43 and 95% (20/21) deaths occurred within 15 days (Supplementary Table 1). When we  
44  
45 compared epidemiological factors for association with adverse outcome of their clinical  
46  
47 progression, our data showed that death was more likely to occur among patients presenting  
48  
49 with age  $\geq 60$  years (OR:13.5; 95% CI: 5.4-33), shortness of breath (OR:14.4; 95% CI: 4.8-  
50  
51 43), co-morbidity (OR:13.9; 95% CI: 3.2-60), smoking history (OR:3.9, 95% CI: 1.5-9.8),  
52  
53 attending to a hospital in <2 days from the onset of symptoms due to critical illness (OR: 5.4;  
54  
55 95% CI: 1.8-17.1) and hospital admission (OR:13.3; 95% CI: 5.3-33.1; Table 2).

## Discussion

This sentinel surveillance identified 39% of patients as laboratory-confirmed COVID-19 among the suspected COVID-19 patients (patients with fever/cough/sore throat/respiratory distress) attending the surveillance hospitals from June to August 2020. Though our data showed more than one-third of the suspected patients were COVID-19 positive, this could be an underestimation; the true burden of this disease in terms of detection rate could be much higher considering the asymptomatic cases in the community and a smaller number of mild symptomatic cases seeking healthcare. Enrolling asymptomatic cases was beyond the scope of this surveillance; however many COVID-19 positive patients remain asymptomatic and possible sources of spreading infection at community<sup>6,14,15</sup>. Moreover, several socio-cultural factors and stigma, administrative malfunction, insecurity, misinformation, and poor trust in treatment- all have a negative impact on Bangladeshi people to seek healthcare and test for COVID-19<sup>16</sup>. Therefore, fewer people might seek healthcare from hospitals and undertake tests for this novel coronavirus through our surveillance platform, and hence, the real burden of COVID-19 could be even more.

COVID-19 suspected patients were found more at OPD than inpatient department, indicating that patients with COVID-19 symptoms were primarily mild, thereby seeking treatment from the OPD. Like any hospital-based survey, this surveillance only captured a portion of the symptomatic patients in the community who sought treatment from the surveillance hospitals. The percent positive (“percent positive rate” or “positivity rate”) helps public health officials to assess the disease burden. COVID-19 positivity rate among the tested patients was increasing till July, followed by a gradual decline (**Figure 2A**). There was a sharp drop in specimen collection in the first week of August due to “Eid holidays” the biggest religious festival for Muslims. During this surveillance period, the percentage of COVID-19 positivity among tested samples was higher enough to draw public health attention. This is quite

1  
2  
3 rational as this sentinel surveillance was strictly supervised and monitored by a team of  
4  
5 dedicated researchers for the utmost quality of specimen and data collection from actual  
6  
7 symptomatic patients and rapid transportation of specimens from remote field sites to central  
8  
9 laboratory at Dhaka maintaining recommended standard temperature for rRT-PCR testing.  
10  
11

12  
13 The national health system intended to collect specimens from symptomatic individuals, but  
14  
15 there was no option/resource for such verification so that some asymptomatic individuals  
16  
17 could be included. Moreover, people seeking a routine COVID-19 PCR test as a requirement  
18  
19 for international travel was also included in the national system for COVID-19 reporting. In  
20  
21 contrast, surveillance staff and physicians strictly verified the symptoms reported by each  
22  
23 patient before enrolment and sample collection through the sentinel surveillance platform.  
24  
25 Thereby, a robust sentinel COVID-19 surveillance is so important to better understand the  
26  
27 actual disease situation in different administrative regions of a country. Continuing a sentinel  
28  
29 surveillance system can explore the existing gap/weaknesses of COVID-19 and other disease  
30  
31 burden estimation by closely and directly monitoring the situation in a particular area.  
32  
33  
34  
35

36  
37 During the initial days of the COVID-19 crisis, there was a deficiency of adequate data to  
38  
39 make appropriate policy decisions for Bangladesh<sup>17</sup>. Providing timely test reports and feeding  
40  
41 peripheral sites' data from our surveillance hospitals to the government recording system  
42  
43 greatly enhanced the management of the novel coronavirus crisis. Moreover, our work  
44  
45 generated some key information about the ongoing COVID-19 pandemic in Bangladesh.  
46  
47 More than half of our coronavirus positive patients were adults, 21-40 years old. This was  
48  
49 consistent with the WHO report for Bangladesh (46.7%) (MMWU, 14 Sept 2020). Among  
50  
51 COVID-19 positive patients, the male was predominant (71%), which might be due to the  
52  
53 male-dominant societies' unique health-seeking behavior like Bangladesh, where women do  
54  
55 not seek healthcare unless severe<sup>18</sup>. This finding was almost similar (68% male) during  
56  
57 March-April, the early phase of novel coronavirus detection in Bangladesh<sup>19</sup>. Other than male  
58  
59  
60

1  
2  
3 predominance, more than half (51%) of the COVID-19 positive patients were found to be  
4 educated for 12 years or more. This might not be the cause that educated people were more  
5 infected than less educated or uneducated; rather it may be people with higher education were  
6 more conscious and thus were coming to hospitals for testing.  
7  
8  
9  
10  
11  
12

13 Chartterjee et. al reported that 5% of symptomatic HCWs were SARS-COV-2 positive in  
14 India<sup>20</sup>. Among COVID-19 suspected healthcare workers from our hospitals, one out of four  
15 was SARS-CoV-2 infected (27%). This was not a surprise because healthcare workers remain  
16 vulnerable to infectious disease in any low- and middle-income countries (LMICs) such as  
17 Bangladesh and demand adequate preparedness to fight against COVID-19<sup>21</sup>. Our findings  
18 also support that HCWs were getting infected at a much higher rate than India and, even  
19 more than that of a COVID-19 dedicated tertiary care hospital in Dhaka (11%)<sup>22</sup>, Bangladesh.  
20 So, appropriate measures should be taken to prevent primary infection from patients and  
21 secondary infection from colleagues. Appropriate measures such as Infection Prevention and  
22 Control training, adequate PPE supply, and their proper use should be taken into  
23 consideration with high priority to protect HCWs from getting infected from their workplace.  
24  
25  
26  
27  
28  
29  
30  
31  
32  
33  
34  
35  
36  
37  
38

39 Clinical features widely vary from asymptomatic infection (40% to 45% of SARS-CoV-2  
40 infections) to death from acute respiratory distress syndrome (ARDS)<sup>5,6,23</sup>. Chinese  
41 researchers reported fever, cough, and expectoration were the commonest symptoms<sup>24</sup> in a  
42 multi-centered study. Another meta-analysis<sup>25</sup> revealed fever (88.7%), cough (57.6%), and  
43 dyspnea (45.6%) were the prominent presentation. We found cough followed by fever as the  
44 top two presenting symptoms of COVID-19 patients. It can be for our case definition too.  
45  
46  
47  
48  
49  
50  
51  
52  
53 Additionally, sore throat, loss of taste and loss of smell, headache, muscle& joint pain were  
54 more likely to occur among laboratory-confirmed COVID-19 patients. Nothing conclusive,  
55 but these differences could be used carefully by the treating physicians to manage a suspected  
56 COVID-19 patient initially before getting the lab report.  
57  
58  
59  
60



1  
2  
3 Comorbidities play a crucial role towards disease progression. Diabetes was the most  
4 commonly reported factor towards the adverse outcome of COVID-19 patients and their  
5 disease progression<sup>26</sup>, requiring more hospitalization (18% vs. 8%) in the ICU and associated  
6 with more death compared to non-diabetic COVID patients<sup>27</sup>. Our surveillance data showed  
7 that diabetic patients were more susceptible to get a COVID-19 infection than others. So,  
8 besides other co-morbidities such as cardiovascular diseases, clinicians should consider  
9 additional clinical measures to manage a COVID-19 positive diabetic patient.  
10  
11  
12  
13  
14  
15  
16  
17  
18  
19

20 Mortality rate is one of the key indicators in public health. Our surveillance data revealed that  
21 the percentage of death among our COVID-19 positive patients was a little higher, 2.3%, than  
22 the global average death rate, 2.2% (2,737,370/124,363,841) as of 22<sup>nd</sup> March 2021. This  
23 death rate was possible to capture due to the unique post-discharge telephone follow up of  
24 enrolled patients after 30 days of enrollment for their outcome. Among all COVID-19  
25 positive patients identified through the surveillance, we detected only 28% death (6/21) from  
26 the surveillance hospitals, the remaining 72% deaths (18/21) were possible to capture from  
27 this unique follow-up strategy of our sentinel surveillance system.  
28  
29  
30  
31  
32  
33  
34  
35  
36  
37  
38

39 According to our findings, elderly, co-morbidity, having breathing difficulty, smoking, and  
40 admission in the inpatient department due to more severe illness were more likely to be the  
41 risk factors for death among the SARS-CoV-2 infected patients.  
42  
43  
44  
45  
46

47 Regarding gender, Italy reported more death among men than women<sup>28</sup>. Nationally,  
48 Bangladesh has more COVID-19 deaths among men (76%) than women (24%)<sup>29</sup>, but we did  
49 not find any significant difference in death rate between males and females from our  
50 surveillance. A nationwide analysis in China showed that age between 65 and 74 years,  
51 coronary heart disease, cerebrovascular disease, dyspnea were independent risk factors  
52 associated with fatal outcome<sup>30</sup>. China CDC analyzed 44,000 COVID patients' data and  
53  
54  
55  
56  
57  
58  
59  
60

1  
2  
3 reported elderly, diabetes, cardiovascular disease, hypertension and chronic respiratory  
4 disease were all associated with an increased risk of death<sup>31</sup>. In the United Kingdom, people  
5 aged over 70 years with cardiovascular and respiratory diseases were considered as high-risk  
6 group<sup>32</sup>. Smoking was associated with increased risks of COVID-19 death and disease  
7 progression, a finding similar to other studies<sup>33–36</sup>. The WHO also mentioned increased  
8 severity of disease and mortality in hospitalized COVID-19 patients among smokers<sup>37</sup>. One  
9 meta-analysis reported a pooled OR of 1.89 (95% CI: 1.10-3.24) on the severity of this  
10 disease among smokers than non-smokers<sup>35</sup>. Another systematic review reported a significant  
11 association between smoking and the progression of COVID-19 (OR: 1.91; 95% CI: 1.42-  
12 2.59); the authors commented that the actual risk of smoking might be higher<sup>38</sup>. So, we  
13 recommend quit smoking to all, whether COVID-19 infected or not, for a better outcome  
14 during this pandemic. The surveillance data also showed more deaths occurred among  
15 critically ill hospitalized patients, which is natural. Thereby, an improved referral system  
16 from a district-level hospital to a tertiary level or specialized hospital could be considered for  
17 high-risk patients, which might reduce mortality.

18  
19  
20  
21  
22  
23  
24  
25  
26  
27  
28  
29  
30  
31  
32  
33  
34  
35  
36  
37  
38  
39  
40  
41  
42  
43  
44  
45  
46  
47  
48  
49  
50  
51  
52  
53  
54  
55  
56  
57  
58  
59  
60  
Despite all efforts, our work had certain limitations. Based on our available resources and  
government priority, we conducted this surveillance at only four hospitals in different  
locations and enrolled suspected patients for three months only, with an additional one-month  
follow-up period. Thus, our findings might not be generalized for the whole Bangladeshi  
population. Moreover, we also missed the true prevalence of COVID-19 patients as we did  
not screen any asymptomatic patients. We only reported hospital-based prevalence because it  
was beyond the scope of this platform to estimate the community burden of COVID-19 in  
Bangladesh.

## Conclusion

Of the patients attending the surveillance hospitals with COVID-19 symptoms during the reporting period, more than one-third had a laboratory-confirmed COVID-19 and, this was more common among outpatients with peak positivity in July. Age  $\geq 60$  years, shortness of breath, co-morbid condition, smoking history, severe illness requiring hospital treatment were identified as the factors associated with death among COVID-19 patients. Though a small initiative, our COVID-19 sentinel surveillance revealed many key findings for the policymakers to understand this pandemic in the country context. Our effort strengthened government's capacity for rapid case detection, reporting, and quick containment efforts. Continuing this sentinel surveillance platform can better characterize disease patterns in populations over time, thus support the government by assessing the magnitude of the health problem and developing a data-driven effective management strategy as well as can monitor the progress towards the reduction of COVID-19 cases after corona vaccination campaign.

1  
2  
3 **Contributors:** The study concept was developed by FC and PD. The protocol was drafted by  
4  
5 PD and critically revised by FC, SB, MR (Mahmudur Rahman), MR (Mahbubur Rahman),  
6  
7 AA, TS, and MF. Data extraction and quality assessment was performed by ZA, SM AI and  
8  
9 PD. Laboratory aspect was managed by ZR and MR (Mustafizur Rahman). PD developed the  
10  
11 first draft manuscript. MR (Mahbubur Rahman), MB, SB, and all other authors provided  
12  
13 feedback for all sections of the protocol including the design, analysis and revising the  
14  
15 manuscript. All authors have approved the final version of the manuscript.  
16  
17

18  
19 **Data availability statement:** Data cannot be made publicly available because these are  
20  
21 confidential. Data are available from the respective department of icddr,b ([www.icddr.org](http://www.icddr.org))  
22  
23 for researchers who meet the criteria for access to confidential data.  
24  
25

26 **Data sharing statement:** No additional data available.  
27

28 **Disclaimer:** Our funding sources had no role in the design of the protocol, and was not  
29  
30 involved during the methodological execution, data analyses and interpretation and decision  
31  
32 to submit or to publish the study results.  
33  
34

35  
36 **Patient and public involvement:** Due to the design of this study, it was not appropriate to  
37  
38 involve patients and/or the public themselves in the design, or conduct, or reporting, or  
39  
40 dissemination plans of this research.  
41  
42

43 **Ethics statements:** The protocol was reviewed and approved by the institutional review  
44  
45 boards (IRB; Research Review Committee and Ethical Review Committee) of the  
46  
47 International Centre for Diarrhoeal Disease Research, Bangladesh (icddr,b). We obtained  
48  
49 written, informed consent of the participants before enrollment.  
50  
51

52  
53 **Funding:** This research protocol was funded by The Foreign, Commonwealth &  
54  
55 Development Office (FCDO – former DFID) of the UK Government and the United States  
56  
57 Agency for International Development (USAID) under the terms of USAID’s Alliance for  
58  
59 Combating TB in Bangladesh activity cooperative agreement no. CA # 72038820CA00002.  
60

1  
2  
3 **Acknowledgement:** This research protocol was funded by The Foreign, Commonwealth &  
4 Development Office (FCDO – former DFID) of the UK Government and the United States  
5 Agency for International Development (USAID) under the terms of USAID’s Alliance for  
6 Combating TB in Bangladesh activity cooperative agreement no. CA # 72038820CA00002.  
7  
8 Views expressed herein do not necessarily reflect the views of the U.S. Government or  
9  
10 USAID. icddr,b acknowledges with gratitude the commitment of FCDO and USAID to its  
11  
12 research efforts. icddr,b is also grateful to the Governments of Bangladesh, Canada, Sweden  
13  
14 and the UK for providing core/unrestricted support.  
15  
16  
17  
18  
19  
20  
21

22 **Conflicts of Interest:** The authors declare no conflict of interest.  
23  
24  
25  
26  
27  
28  
29  
30  
31  
32  
33  
34  
35  
36  
37  
38  
39  
40  
41  
42  
43  
44  
45  
46  
47  
48  
49  
50  
51  
52  
53  
54  
55  
56  
57  
58  
59  
60

## References

1. Cheng ZJ, Shan J. 2019 Novel coronavirus: where we are and what we know. *Infection*. 2020;48(2):155-163. doi:10.1007/s15010-020-01401-y
2. Worldometer. Coronavirus Update (Live): Cases and Deaths from COVID-19 Virus Pandemic. Accessed April 1, 2021. <https://www.worldometers.info/coronavirus/>
3. Huang C, Wang Y, Li X, et al. Clinical features of patients infected with 2019 novel coronavirus in Wuhan, China. *Lancet*. Published online 2020. doi:10.1016/S0140-6736(20)30183-5
4. Leung C. Clinical features of deaths in the novel coronavirus epidemic in China. *Rev Med Virol*. 2020;30(3). doi:10.1002/rmv.2103
5. Hassan SA, Sheikh FN, Jamal S, Ezeh JK, Akhtar A. Coronavirus (COVID-19): A Review of Clinical Features, Diagnosis, and Treatment. *Cureus*. Published online March 21, 2020. doi:10.7759/cureus.7355
6. Oran DP, Topol EJ. Prevalence of Asymptomatic SARS-CoV-2 Infection : A Narrative Review. *Ann Intern Med*. Published online 2020. doi:10.7326/M20-3012
7. WHO Timeline - COVID-19. Accessed November 9, 2020. <https://www.who.int/news/item/27-04-2020-who-timeline---COVID-19>
8. COVID-19 Map - Johns Hopkins Coronavirus Resource Center. Accessed March 25, 2020. <https://coronavirus.jhu.edu/map.html>
9. The first few X cases and contacts (FFX) investigation protocol for coronavirus disease 2019 (COVID-19), version 2.2. Accessed November 15, 2020. [https://www.who.int/publications/i/item/the-first-few-x-cases-and-contacts-\(-ffx\)-investigation-protocol-for-coronavirus-disease-2019-\(-covid-19\)-version-2.2](https://www.who.int/publications/i/item/the-first-few-x-cases-and-contacts-(-ffx)-investigation-protocol-for-coronavirus-disease-2019-(-covid-19)-version-2.2)
10. Ahmed M, Aleem MA, Roguski K, et al. Estimates of seasonal influenza-associated mortality in Bangladesh, 2010-2012. *Influenza Other Respi Viruses*. Published online 2018. doi:10.1111/irv.12490
11. Zaman RU, Alamgir ASM, Rahman M, et al. Influenza in outpatient ILI case-patients in national hospital-based surveillance, Bangladesh, 2007-2008. *PLoS One*. Published online 2009. doi:10.1371/journal.pone.0008452
12. Islam MT, Talukder AK, Siddiqui MN, Islam T. Tackling the COVID-19 pandemic: the Bangladesh perspective. *J Public Health Res*. Published online 2020. doi:10.4081/jphr.2020.1794
13. Bangladesh Coronavirus: 430,496 Cases and 6,173 Deaths - Worldometer. Accessed November 15, 2020. <https://www.worldometers.info/coronavirus/country/bangladesh/>
14. Chan JFW, Yuan S, Kok KH, et al. A familial cluster of pneumonia associated with the 2019 novel coronavirus indicating person-to-person transmission: a study of a family cluster. *Lancet*. Published online 2020. doi:10.1016/S0140-6736(20)30154-9
15. Rothe C, Schunk M, Sothmann P, et al. Transmission of 2019-nCoV Infection from an Asymptomatic Contact in Germany. *N Engl J Med*. Published online 2020. doi:10.1056/nejmc2001468

16. Mahmud A, Islam MR. Social Stigma as a Barrier to Covid-19 Responses to Community Well-Being in Bangladesh. *Int J Community Well-Being*. Published online 2020. doi:10.1007/s42413-020-00071-w
17. Huq S, Biswas RK. COVID-19 in Bangladesh: Data deficiency to delayed decision. *J Glob Health*. 2020;10(1). doi:10.7189/jogh.10.010342
18. Ahmed SM, Adams AM, Chowdhury M, Bhuiya A. Gender, socioeconomic development and health-seeking behaviour in Bangladesh. *Soc Sci Med*. Published online 2000. doi:10.1016/S0277-9536(99)00461-X
19. More men than women dying in BD from coronavirus. Accessed November 24, 2020. <https://www.thefinancialexpress.com.bd/national/more-men-than-women-dying-in-bd-from-coronavirus-1587215821>
20. Chatterjee P, Anand T, Singh K, et al. Healthcare workers & SARS-CoV-2 infection in India: A case-control investigation in the time of COVID-19. *Indian J Med Res*. Published online 2020. doi:10.4103/ijmr.IJMR\_2234\_20
21. Hassan MZ, Monjur MR, Styczynski AR. Protecting front line health care workers should be the top priority in low-resource health systems: Case of Bangladesh. *Infect Control Hosp Epidemiol*. Published online 2020:1. doi:10.1017/ice.2020.208
22. Yasmin R, Parveen R, Azad N Al, et al. Corona Virus Infection among Healthcare Workers in a COVID Dedicated Tertiary Care Hospital in Dhaka, Bangladesh. *J Bangladesh Coll Physicians Surg*. Published online 2020. doi:10.3329/jbcps.v38i0.47442
23. Manabe T, Akatsu H, Kotani K, Kudo K. Trends in clinical features of novel coronavirus disease (COVID-19): A systematic review and meta-analysis of studies published from December 2019 to February 2020. *Respir Investig*. 2020;58(5):409-418. doi:10.1016/j.resinv.2020.05.005
24. Yang W, Cao Q, Qin L, et al. Clinical characteristics and imaging manifestations of the 2019 novel coronavirus disease (COVID-19): A multi-center study in Wenzhou city, Zhejiang, China. *J Infect*. Published online 2020. doi:10.1016/j.jinf.2020.02.016
25. Rodriguez-Morales AJ, Cardona-Ospina JA, Gutiérrez-Ocampo E, et al. Clinical, laboratory and imaging features of COVID-19: A systematic review and meta-analysis. *Travel Med Infect Dis*. Published online 2020. doi:10.1016/j.tmaid.2020.101623
26. Cen Y, Chen X, Shen Y, et al. Risk factors for disease progression in patients with mild to moderate coronavirus disease 2019—a multi-centre observational study. *Clin Microbiol Infect*. Published online 2020. doi:10.1016/j.cmi.2020.05.041
27. Shi Q, Zhang X, Jiang F, et al. Clinical Characteristics and Risk Factors for Mortality of COVID-19 Patients With Diabetes in Wuhan, China: A Two-Center, Retrospective Study. *Diabetes Care*. 2020;43(7):1382-1391. doi:10.2337/dc20-0598
28. Livingston E, Bucher K. Coronavirus Disease 2019 (COVID-19) in Italy. *JAMA*. Published online 2020. doi:10.1001/jama.2020.4344
29. MIS, DGHS, Bangladesh. Accessed January 2, 2021. <https://dghs.gov.bd/index.php/bd/component/content/article?layout=edit&id=5612>
30. Chen R, Liang W, Jiang M, et al. Risk Factors of Fatal Outcome in Hospitalized Subjects With Coronavirus Disease 2019 From a Nationwide Analysis in China. *Chest*. 2020;158(1):97-105.

- 1  
2  
3 doi:10.1016/j.chest.2020.04.010  
4  
5 31. Wu Z, McGoogan JM. Characteristics of and Important Lessons from the Coronavirus Disease  
6 2019 (COVID-19) Outbreak in China: Summary of a Report of 72314 Cases from the Chinese  
7 Center for Disease Control and Prevention. *JAMA - J Am Med Assoc*. Published online 2020.  
8 doi:10.1001/jama.2020.2648  
9  
10 32. Public Health England. Seasonal flu vaccine uptake in GP patients: winter 2018 to 2019 -  
11 GOV.UK. Accessed November 25, 2020. [https://www.gov.uk/government/statistics/seasonal-](https://www.gov.uk/government/statistics/seasonal-flu-vaccine-uptake-in-gp-patients-winter-2018-to-2019)  
12 [flu-vaccine-uptake-in-gp-patients-winter-2018-to-2019](https://www.gov.uk/government/statistics/seasonal-flu-vaccine-uptake-in-gp-patients-winter-2018-to-2019)  
13  
14 33. Huang R, Zhuid L, Xue L, et al. Clinical findings of patients with coronavirus disease 2019 in  
15 Jiangsu Province, China: A retrospective, multi-center study. *PLoS Negl Trop Dis*. Published  
16 online 2020. doi:10.1371/journal.pntd.0008280  
17  
18 34. Wang D, Hu B, Hu C, et al. Clinical Characteristics of 138 Hospitalized Patients with 2019  
19 Novel Coronavirus-Infected Pneumonia in Wuhan, China. *JAMA - J Am Med Assoc*. Published  
20 online 2020. doi:10.1001/jama.2020.1585  
21  
22 35. Guo FR. Smoking links to the severity of COVID-19: An update of a meta-analysis. *J Med Virol*.  
23 2020;92(11):2304-2305. doi:10.1002/jmv.25967  
24  
25 36. Vardavas CI, Nikitara K. COVID-19 and smoking: A systematic review of the evidence. *Tob*  
26 *Induc Dis*. Published online 2020. doi:10.18332/tid/119324  
27  
28 37. Smoking and COVID-19. WHO. Accessed January 2, 2021. [https://www.who.int/news-](https://www.who.int/news-room/commentaries/detail/smoking-and-covid-19)  
29 [room/commentaries/detail/smoking-and-covid-19](https://www.who.int/news-room/commentaries/detail/smoking-and-covid-19)  
30  
31 38. Patanavanich R, Glantz SA. Smoking Is Associated With COVID-19 Progression: A Meta-  
32 analysis. *Nicotine Tob Res*. Published online 2020. doi:10.1093/ntr/ntaa082  
33  
34  
35  
36  
37  
38  
39  
40  
41  
42  
43  
44  
45  
46  
47  
48  
49  
50  
51  
52  
53  
54  
55  
56  
57  
58  
59  
60



**Table 1.** Socio-demographic characteristics of suspected COVID-19 patients in selected hospitals of Bangladesh, June-August 2020

| Characteristics     | Suspected COVID-19 patients (N=2345) | SARS-CoV-2 Positive by rRT-PCR |                      |                         |
|---------------------|--------------------------------------|--------------------------------|----------------------|-------------------------|
|                     |                                      | Total Positive (922)           | Inpatient (57) n (%) | Out-patient (865) n (%) |
| Age (in years)      |                                      |                                |                      |                         |
| Median (IQR)        | 35 (26-48)                           | 38 (30-50)                     | 55 (45-69)           | 38 (29-48)              |
| Age sub-groups      |                                      |                                |                      |                         |
| 0-5                 | 25 (1.11)                            | 6 (0.7)                        | 1 (1.7)              | 5 (0.6)                 |
| 6-10                | 30 (1.3)                             | 11 (1.2)                       | 0 (0)                | 11 (1.3)                |
| 11-20               | 167 (7.1)                            | 42 (4.5)                       | 0 (0)                | 42 (4.8)                |
| 21-30               | 684 (29.1)                           | 228 (24.7)                     | 5 (8.7)              | 223 (25.8)              |
| 31-40               | 594 (25.3)                           | 246 (26.6)                     | 6 (10.5)             | 240 (27.7)              |
| 41-50               | 382 (16.3)                           | 182 (19.7)                     | 11 (19.3)            | 171 (19.7)              |
| 51-60               | 267 (11.4)                           | 125 (13.5)                     | 8 (14.0)             | 117 (13.5)              |
| 60+                 | 196 (8.3)                            | 82 (8.8)                       | 26 (45.6)            | 56 (6.5)                |
| Sex                 |                                      |                                |                      |                         |
| Male                | 1590 (67.8)                          | 654 (70.9)                     | 38 (66.7)            | 616 (71.2)              |
| Occupation          |                                      |                                |                      |                         |
| HCW                 | 302 (12.9)                           | 83 (9.0)                       | 2 (3.5)              | 81 (9.4)                |
| Service             | 946 (40.3)                           | 431 (46.8)                     | 7 (12.3)             | 424 (49.0)              |
| Business            | 154 (6.6)                            | 82 (8.9)                       | 6 (10.5)             | 76 (8.8)                |
| Student             | 223 (9.5)                            | 68 (7.4)                       | 0 (0)                | 68 (7.9)                |
| Dependent           | 215 (9.1)                            | 73 (7.9)                       | 22 (38.6)            | 51 (5.9)                |
| Unemployed          | 145 (6.1)                            | 64 (6.9)                       | 9 (15.8)             | 55 (6.3)                |
| Others*             | 360 (15.3)                           | 121 (13.1)                     | 11 (19.3)            | 110 (12.7)              |
| Education (years)   |                                      |                                |                      |                         |
| No formal schooling | 155 (6.6)                            | 44 (4.8)                       | 11 (19.3)            | 33 (3.8)                |
| 1-5                 | 255 (10.9)                           | 89 (9.7)                       | 11 (19.3)            | 78 (9.0)                |
| 6-10                | 496 (21.2)                           | 178 (19.3)                     | 22 (38.6)            | 156 (18.0)              |
| 11-12               | 367 (15.7)                           | 144 (15.6)                     | 7 (12.3)             | 137 (15.8)              |
| >12                 | 1072 (45.6)                          | 467 (50.7)                     | 6 (10.5)             | 461 (53.4)              |

\*Farmer, day-labour, small shop owner, rickshaw/van puller, driver etc.

**Table 2.** Factors associated with adverse outcome (death) among COVID-19 positive patients in selected hospitals of Bangladesh, June-August 2020.

| Factors                                                    | Frequency<br>N=922 | Death<br>n=21<br>Frequency (%) | Odds<br>ratio<br>(OR) | 95% CI        |
|------------------------------------------------------------|--------------------|--------------------------------|-----------------------|---------------|
| Age*                                                       | 0-59 years         | 812                            | 8 (1%)                | 1             |
|                                                            | ≥ 60 years         | 110                            | 13 (11.8%)            | 13.5 5.4-33.3 |
| Sex                                                        | Male               | 654                            | 14 (2.1%)             | 1             |
|                                                            | Female             | 268                            | 7 (2.6%)              | 1.2 0.5-3.0   |
| Health care worker                                         | Yes                | 83                             | 0 (0%)                | 1             |
|                                                            | No                 | 839                            | 21 (2.5%)             | 1.0 -         |
| Symptoms                                                   | ≤3 symptoms        | 314                            | 7 (2.2%)              | 1             |
|                                                            | >3 symptoms        | 608                            | 14 (2.3%)             | 1.0 0.4-2.5   |
| Shortness of breath*                                       | No                 | 700                            | 4 (0.6%)              | 1             |
|                                                            | Yes                | 222                            | 17 (7.7%)             | 14.4 4.8-43   |
| Comorbidity*                                               | No                 | 538                            | 2 (0.4%)              | 1             |
|                                                            | Yes                | 384                            | 19 (4.9%)             | 13.9 3.2-60   |
| History of smoking*                                        | No                 | 812                            | 14 (1.7%)             | 1             |
|                                                            | Yes                | 110                            | 7 (6.4%)              | 3.9 1.5-9.8   |
| Treatment received from*                                   | OPD                | 865                            | 12 (1.4%)             | 1             |
|                                                            | inpatient          | 57                             | 9 (15.8%)             | 13.3 5.3-33.1 |
| Duration of hospital attendance from the onset of symptom* | ≥ 2 days           | 880                            | 17 (1.9%)             | 1             |
|                                                            | < 2 days           | 42                             | 4 (9.8%)              | 5.4 1.8-17.1  |

*\*Factors with a significant difference between groups*

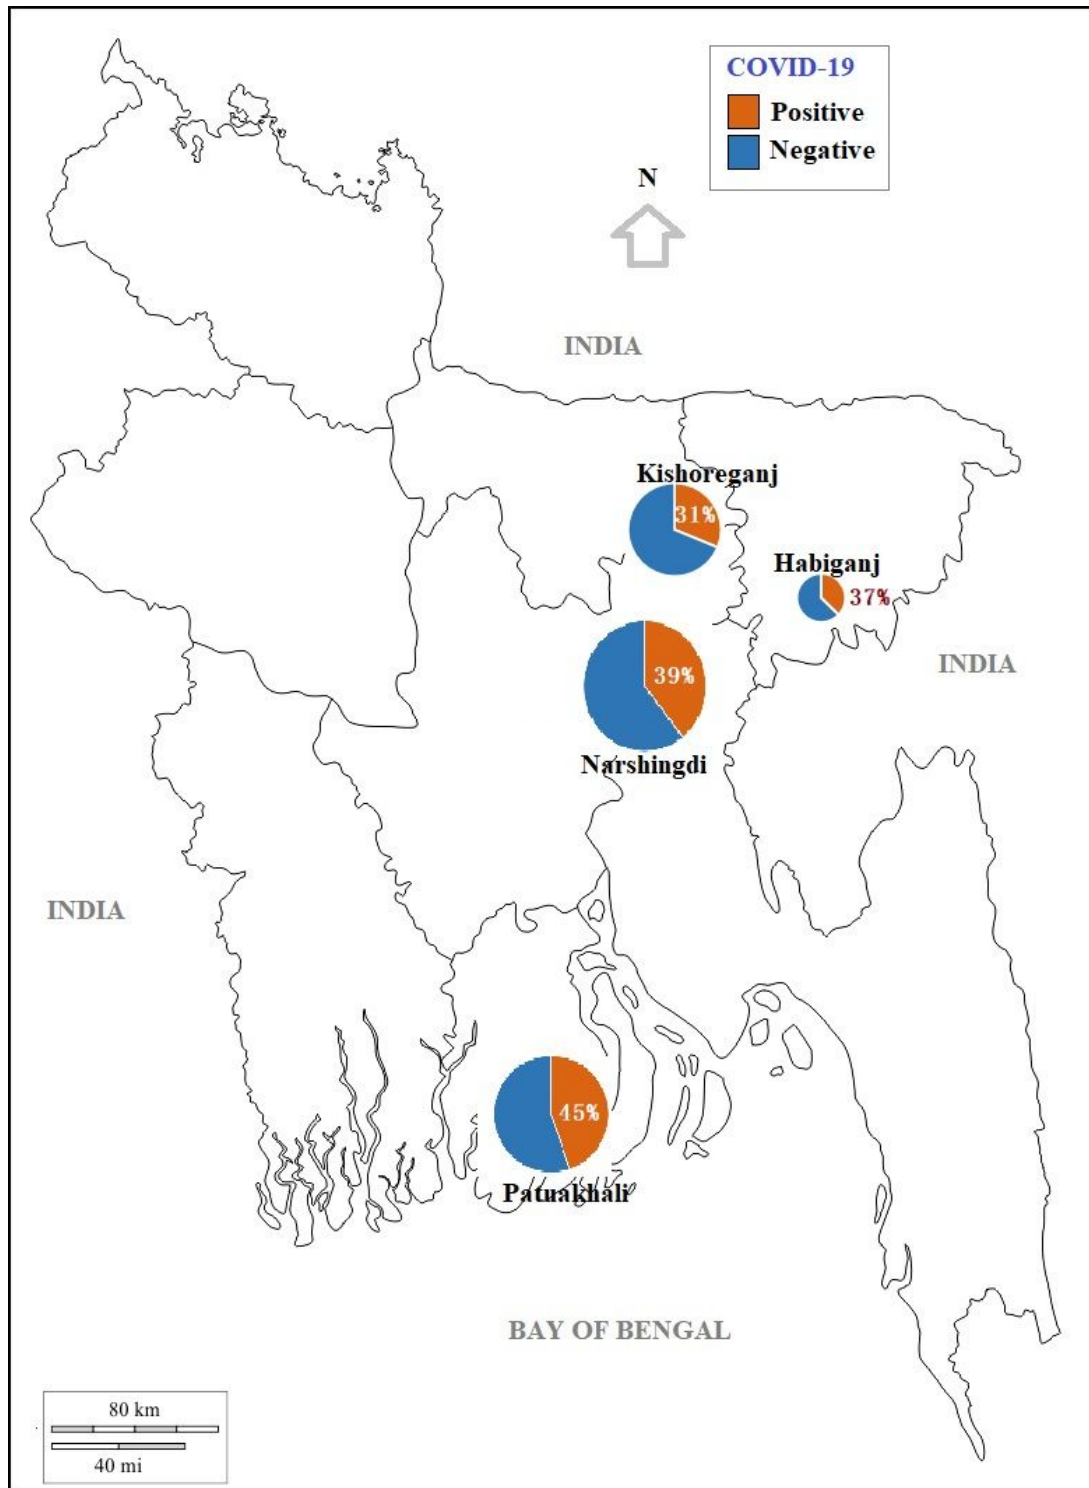

**Figure 1.** Location of the study hospitals and proportionate distribution of enrolled patients at different sites with their COVID-19 positivity, June to August 2020

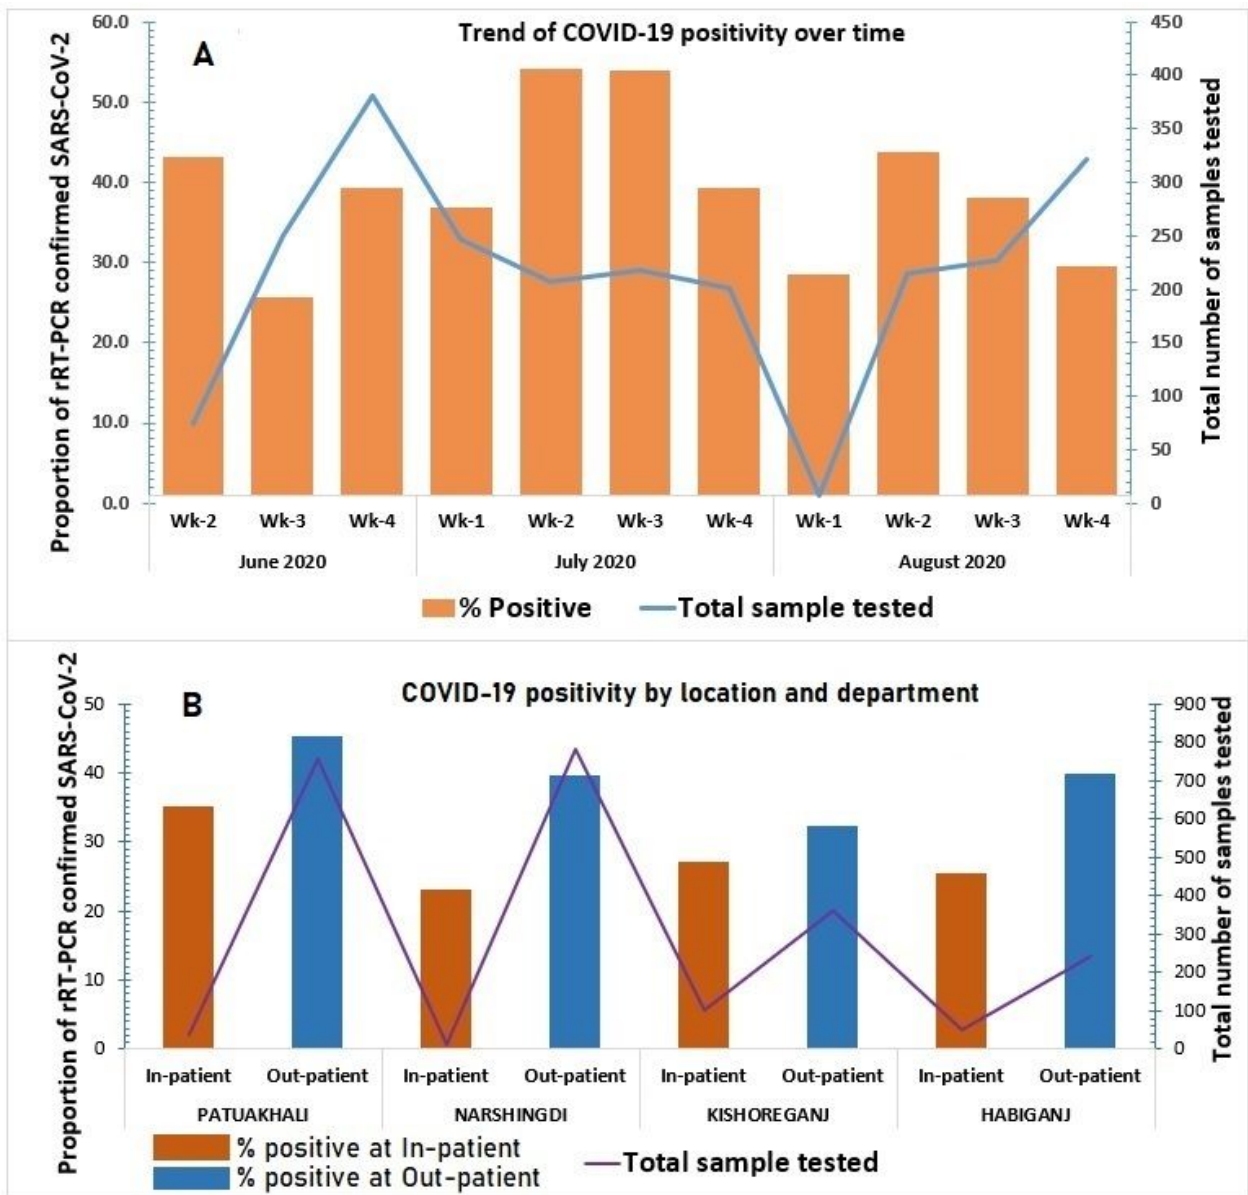

**Figure 2.** SARS-CoV-2 infection among suspected COVID-19 patients at inpatient and outpatient departments of selected hospitals during June to August 2020, Bangladesh

A- Detection of SARS-CoV-2 at all four selected hospitals over time

B- Detection of SARS-CoV-2 at inpatient and outpatient departments of selected hospital sites

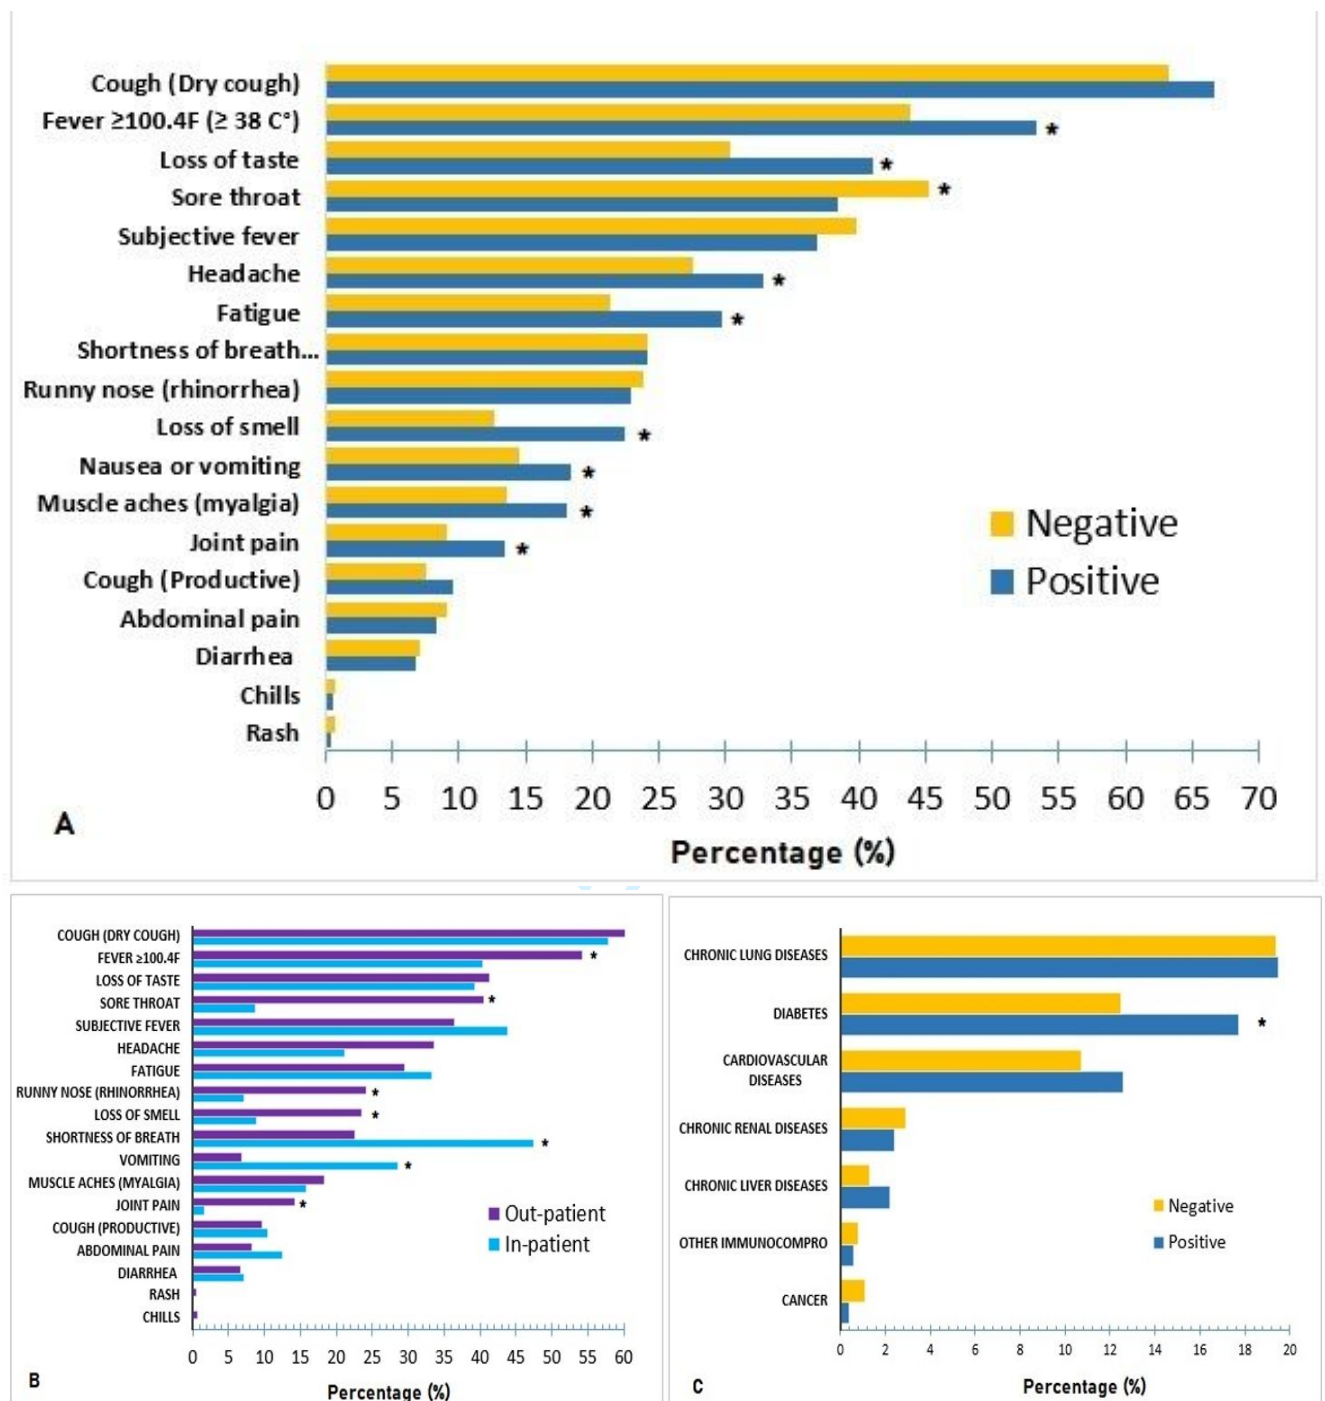

**Figure 3. Distribution of SARS-CoV-2 infected patients by their clinical features and comorbidity in selected hospitals of Bangladesh, June-August 2020**

- Presenting symptoms of all COVID-19 suspected patients by rRT-PCR results
- Presenting symptoms of COVID-19 patients by department
- COVID-19 positive patients by their comorbidity

**Supplementary table 1.** Distribution of deaths among COVID-19 positive patients in selected hospitals of Bangladesh, June-August 2020.

|                                                           | Hospital death<br>n= 16 | Home death<br>n=5              |
|-----------------------------------------------------------|-------------------------|--------------------------------|
| <b>Age (years)</b>                                        |                         |                                |
| Lowest, highest                                           | 40, 85                  | 51, 90                         |
| Median (IQR)                                              | 65 (55-69)              | 64 (52-70)                     |
| <b>Sex</b>                                                |                         |                                |
| Male                                                      | 11 (69)                 | 3 (60)                         |
| <b>Timing of death from symptom onset</b>                 |                         |                                |
| 0-7 days                                                  | 6 (38)    6 (38) Cum.   | 3 (60)    3 (60) Cum.          |
| 8-15 days                                                 | 9 (56)    15 (94)       | 2 (40)    5 (100)              |
| 16-40 days                                                | 1 (6)    16 (100)       |                                |
| <b>Manner of death</b>                                    |                         |                                |
| Disease                                                   | 16                      | 5 (100)                        |
| Accident                                                  | 0                       | 0                              |
| Sudden death (heart attack)                               | 0                       | 0                              |
| <b>Comorbidity present (anyone)</b>                       | 15 (94%)                | 4 (80)                         |
| DM                                                        | 9 (56)                  | 2 (40)                         |
| Asthma/COPD                                               | 4 (25)                  | 2 (40)                         |
| Heart disease/HTN                                         | 6 (37)                  | 2 (40)                         |
| Chronic renal disease                                     | 4 (25)                  | 0                              |
| Cancer (uterine)                                          | 1 (6)                   | 0                              |
| <b>Clinical course of treatment</b>                       |                         |                                |
| Oxygen required                                           | 16 (100)                | 3 (60) [ 2 got oxygen at home] |
| ICU admitted                                              | 3 (19)                  |                                |
| CCU admitted                                              | 1 (6)                   |                                |
| Dialysis required                                         | 1 (6)                   |                                |
| <b>Cause of death as stated from hospital as reported</b> |                         |                                |
| COVID-19 + Respiratory failure                            | 14 (88)                 |                                |
| Pneumonia                                                 | 1 (6)                   |                                |
| Chronic renal failure                                     | 1 (6)                   |                                |

STROBE Statement—Checklist of items that should be included in reports of *cross-sectional studies*

|                              | Item No | Recommendation                                                                                                                                                                                               | Page No |
|------------------------------|---------|--------------------------------------------------------------------------------------------------------------------------------------------------------------------------------------------------------------|---------|
| <b>Title and abstract</b>    | 1       | (a) Indicate the study's design with a commonly used term in the title or the abstract                                                                                                                       | 1       |
|                              |         | (b) Provide in the abstract an informative and balanced summary of what was done and what was found                                                                                                          | 1       |
| <b>Introduction</b>          |         |                                                                                                                                                                                                              |         |
| Background/rationale         | 2       | Explain the scientific background and rationale for the investigation being reported                                                                                                                         | 4-5     |
| Objectives                   | 3       | State specific objectives, including any prespecified hypotheses                                                                                                                                             | 5       |
| <b>Methods</b>               |         |                                                                                                                                                                                                              |         |
| Study design                 | 4       | Present key elements of study design early in the paper                                                                                                                                                      | 6       |
| Setting                      | 5       | Describe the setting, locations, and relevant dates, including periods of recruitment, exposure, follow-up, and data collection                                                                              | 6-7     |
| Participants                 | 6       | (a) Give the eligibility criteria, and the sources and methods of selection of participants                                                                                                                  | 6       |
| Variables                    | 7       | Clearly define all outcomes, exposures, predictors, potential confounders, and effect modifiers. Give diagnostic criteria, if applicable                                                                     | 8       |
| Data sources/<br>measurement | 8*      | For each variable of interest, give sources of data and details of methods of assessment (measurement). Describe comparability of assessment methods if there is more than one group                         | NA      |
| Bias                         | 9       | Describe any efforts to address potential sources of bias                                                                                                                                                    | NA      |
| Study size                   | 10      | Explain how the study size was arrived at                                                                                                                                                                    | NA      |
| Quantitative variables       | 11      | Explain how quantitative variables were handled in the analyses. If applicable, describe which groupings were chosen and why                                                                                 | 7       |
| Statistical methods          | 12      | (a) Describe all statistical methods, including those used to control for confounding                                                                                                                        | 7       |
|                              |         | (b) Describe any methods used to examine subgroups and interactions                                                                                                                                          | 7       |
|                              |         | (c) Explain how missing data were addressed                                                                                                                                                                  | NA      |
|                              |         | (d) If applicable, describe analytical methods taking account of sampling strategy                                                                                                                           |         |
|                              |         | (e) Describe any sensitivity analyses                                                                                                                                                                        |         |
| <b>Results</b>               |         |                                                                                                                                                                                                              |         |
| Participants                 | 13*     | (a) Report numbers of individuals at each stage of study—eg numbers potentially eligible, examined for eligibility, confirmed eligible, included in the study, completing follow-up, and analysed            | 8       |
|                              |         | (b) Give reasons for non-participation at each stage                                                                                                                                                         | NA      |
|                              |         | (c) Consider use of a flow diagram                                                                                                                                                                           | NA      |
| Descriptive data             | 14*     | (a) Give characteristics of study participants (eg demographic, clinical, social) and information on exposures and potential confounders                                                                     | 8-9     |
|                              |         | (b) Indicate number of participants with missing data for each variable of interest                                                                                                                          | NA      |
| Outcome data                 | 15*     | Report numbers of outcome events or summary measures                                                                                                                                                         | 7-10    |
| Main results                 | 16      | (a) Give unadjusted estimates and, if applicable, confounder-adjusted estimates and their precision (eg, 95% confidence interval). Make clear which confounders were adjusted for and why they were included | 10      |

|                          |    |                                                                                                                                                                            |       |
|--------------------------|----|----------------------------------------------------------------------------------------------------------------------------------------------------------------------------|-------|
|                          |    | (b) Report category boundaries when continuous variables were categorized                                                                                                  | NA    |
|                          |    | (c) If relevant, consider translating estimates of relative risk into absolute risk for a meaningful time period                                                           |       |
| Other analyses           | 17 | Report other analyses done—eg analyses of subgroups and interactions, and sensitivity analyses                                                                             | NA    |
| <b>Discussion</b>        |    |                                                                                                                                                                            |       |
| Key results              | 18 | Summarise key results with reference to study objectives                                                                                                                   | 10-15 |
| Limitations              | 19 | Discuss limitations of the study, taking into account sources of potential bias or imprecision. Discuss both direction and magnitude of any potential bias                 | 15    |
| Interpretation           | 20 | Give a cautious overall interpretation of results considering objectives, limitations, multiplicity of analyses, results from similar studies, and other relevant evidence | 16    |
| Generalisability         | 21 | Discuss the generalisability (external validity) of the study results                                                                                                      | 15    |
| <b>Other information</b> |    |                                                                                                                                                                            |       |
| Funding                  | 22 | Give the source of funding and the role of the funders for the present study and, if applicable, for the original study on which the present article is based              | 16    |

\*Give information separately for exposed and unexposed groups.

**Note:** An Explanation and Elaboration article discusses each checklist item and gives methodological background and published examples of transparent reporting. The STROBE checklist is best used in conjunction with this article (freely available on the Web sites of PLoS Medicine at <http://www.plosmedicine.org/>, Annals of Internal Medicine at <http://www.annals.org/>, and Epidemiology at <http://www.epidem.com/>). Information on the STROBE Initiative is available at [www.strobe-statement.org](http://www.strobe-statement.org).



# BMJ Open

## Establishing a sentinel surveillance system for the novel coronavirus disease 2019 (COVID-19) in a resource limited county: methods, system attributes and early findings

|                                 |                                                                                                                                                                                                                                                                                                                                                                                                                                                                                                                                                                                                                                                                                                                                                                                                                                                                                                                                                                                                                                                                                                                                                                                        |
|---------------------------------|----------------------------------------------------------------------------------------------------------------------------------------------------------------------------------------------------------------------------------------------------------------------------------------------------------------------------------------------------------------------------------------------------------------------------------------------------------------------------------------------------------------------------------------------------------------------------------------------------------------------------------------------------------------------------------------------------------------------------------------------------------------------------------------------------------------------------------------------------------------------------------------------------------------------------------------------------------------------------------------------------------------------------------------------------------------------------------------------------------------------------------------------------------------------------------------|
| Journal:                        | <i>BMJ Open</i>                                                                                                                                                                                                                                                                                                                                                                                                                                                                                                                                                                                                                                                                                                                                                                                                                                                                                                                                                                                                                                                                                                                                                                        |
| Manuscript ID                   | bmjopen-2021-055169.R1                                                                                                                                                                                                                                                                                                                                                                                                                                                                                                                                                                                                                                                                                                                                                                                                                                                                                                                                                                                                                                                                                                                                                                 |
| Article Type:                   | Original research                                                                                                                                                                                                                                                                                                                                                                                                                                                                                                                                                                                                                                                                                                                                                                                                                                                                                                                                                                                                                                                                                                                                                                      |
| Date Submitted by the Author:   | 30-Sep-2021                                                                                                                                                                                                                                                                                                                                                                                                                                                                                                                                                                                                                                                                                                                                                                                                                                                                                                                                                                                                                                                                                                                                                                            |
| Complete List of Authors:       | Das, Pritimoy; International Centre for Diarrhoeal Disease Research Bangladesh<br>Akhtar, Zubair; International Centre for Diarrhoeal Disease Research Bangladesh<br>Mah-E-Muneer, Syeda ; International Centre for Diarrhoeal Disease Research Bangladesh<br>Islam, Md.; International Centre for Diarrhoeal Disease Research Bangladesh<br>Rahman, Mohammed; International Centre for Diarrhoeal Disease Research Bangladesh<br>Rahman, Mustafizur; International Centre for Diarrhoeal Disease Research Bangladesh<br>Rahman, Mahmudur; International Centre for Diarrhoeal Disease Research Bangladesh<br>Rahman , Mahbubur ; Institute of Epidemiology Disease Control and Research<br>Billah, Mallick; Institute of Epidemiology Disease Control and Research<br>Alamgir, A. S. M; Institute of Epidemiology Disease Control and Research<br>Flora, Meerjady Sabrina ; Institute of Epidemiology Disease Control and Research<br>Shirin, Tahmina; Institute of Epidemiology Disease Control and Research<br>Banu, Sayera; International Centre for Diarrhoeal Disease Research Bangladesh<br>Chowdhury, Fahmida; International Centre for Diarrhoeal Disease Research Bangladesh |
| <b>Primary Subject Heading</b>: | Public health                                                                                                                                                                                                                                                                                                                                                                                                                                                                                                                                                                                                                                                                                                                                                                                                                                                                                                                                                                                                                                                                                                                                                                          |
| Secondary Subject Heading:      | Epidemiology, Global health, Infectious diseases                                                                                                                                                                                                                                                                                                                                                                                                                                                                                                                                                                                                                                                                                                                                                                                                                                                                                                                                                                                                                                                                                                                                       |
| Keywords:                       | COVID-19, Epidemiology < TROPICAL MEDICINE, Public health < INFECTIOUS DISEASES, Diagnostic microbiology < INFECTIOUS DISEASES, EPIDEMIOLOGY                                                                                                                                                                                                                                                                                                                                                                                                                                                                                                                                                                                                                                                                                                                                                                                                                                                                                                                                                                                                                                           |
|                                 |                                                                                                                                                                                                                                                                                                                                                                                                                                                                                                                                                                                                                                                                                                                                                                                                                                                                                                                                                                                                                                                                                                                                                                                        |

1  
2  
3  
4  
5  
6  
7  
8  
9  
10  
11  
12  
13  
14  
15  
16  
17  
18  
19  
20  
21  
22  
23  
24  
25  
26  
27  
28  
29  
30  
31  
32  
33  
34  
35  
36  
37  
38  
39  
40  
41  
42  
43  
44  
45  
46  
47  
48  
49  
50  
51  
52  
53  
54  
55  
56  
57  
58  
59  
60

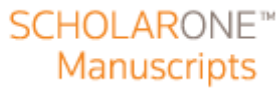



I, the Submitting Author has the right to grant and does grant on behalf of all authors of the Work (as defined in the below author licence), an exclusive licence and/or a non-exclusive licence for contributions from authors who are: i) UK Crown employees; ii) where BMJ has agreed a CC-BY licence shall apply, and/or iii) in accordance with the terms applicable for US Federal Government officers or employees acting as part of their official duties; on a worldwide, perpetual, irrevocable, royalty-free basis to BMJ Publishing Group Ltd ("BMJ") its licensees and where the relevant Journal is co-owned by BMJ to the co-owners of the Journal, to publish the Work in this journal and any other BMJ products and to exploit all rights, as set out in our [licence](#).

The Submitting Author accepts and understands that any supply made under these terms is made by BMJ to the Submitting Author unless you are acting as an employee on behalf of your employer or a postgraduate student of an affiliated institution which is paying any applicable article publishing charge ("APC") for Open Access articles. Where the Submitting Author wishes to make the Work available on an Open Access basis (and intends to pay the relevant APC), the terms of reuse of such Open Access shall be governed by a Creative Commons licence – details of these licences and which [Creative Commons](#) licence will apply to this Work are set out in our licence referred to above.

Other than as permitted in any relevant BMJ Author's Self Archiving Policies, I confirm this Work has not been accepted for publication elsewhere, is not being considered for publication elsewhere and does not duplicate material already published. I confirm all authors consent to publication of this Work and authorise the granting of this licence.

# Establishing a sentinel surveillance system for the novel coronavirus disease 2019 (COVID-19) in a resource limited county: methods, system attributes and early findings

Pritimoy Das<sup>1</sup> †, Zubair Akhtar<sup>1</sup>, Syeda Mah-E-Muneer<sup>1</sup>, Md Ariful Islam<sup>1</sup>, Mohammed Ziaur Rahman<sup>1</sup>, Mustafizur Rahman<sup>1</sup>, Mahmudur Rahman<sup>1</sup>, Mahbubur Rahman<sup>2</sup>, Mallick Masum Billah<sup>2</sup>, ASM Alamgir<sup>2</sup>, Meerjady Sabrina Flora<sup>2</sup>, Tahmina Shirin<sup>2</sup>, Sayera Banu<sup>1</sup>, Fahmida Chowdhury<sup>1</sup>

<sup>1</sup>Infectious Diseases Division, International Centre for Diarrhoeal Disease Research, Bangladesh (icddr,b), Dhaka, Bangladesh

<sup>2</sup>Institute of Epidemiology, Disease Control and Research (IEDCR), Dhaka, Bangladesh

†Correspondence to Pritimoy Das; [pritimoydas@gmail.com](mailto:pritimoydas@gmail.com)

## ABSTRACT

**Objectives** To establish a hospital-based platform to explore the epidemiological and clinical characteristics of patients screened for COVID-19.

**Design** Hospital-based surveillance.

**Setting** This study was conducted in four selected hospitals in Bangladesh during 10th June to 31st August 2020.

**Participants** In total, two thousand three hundred and forty-five patients of all age (68% male) attending the outpatient and inpatient departments of surveillance hospitals with any one or more of the following symptoms within last 7 days- fever, cough, sore throat, and respiratory distress.

**Outcome measures** The outcome measures were COVID-19 positivity and mortality rate among enrolled patients. Pearson's  $\chi^2$  test was used to compare the categorical variables (sign-symptoms, co-morbidities, admission status and COVID-19 test results). Regression analysis was performed to determine the association between potential risk factors and death.

**Results** COVID-19 was detected among 922 (39%) enrolled patients. It was more common in outpatients with a peak positivity in 2nd week of July (112, 54%). The median age of the

1  
2  
3 confirmed COVID-19 cases was 38 years (IQR: 30-50), 654 (71%) were male, and 83 (9%)  
4 were healthcare workers. Cough (615, 67%) was the most common symptom, followed by  
5 fever (493, 53%). Diabetic patients were more likely to get COVID-19 than non-diabetic  
6 (48% vs. 38%; OR:1.5; 95% CI:1.2-1.9). The death rate among COVID-19 positive was  
7 2.3%, n=21. Death was associated with age  $\geq$  60 years (AOR:13.9; 95% CI:5.5-34), shortness  
8 of breath (AOR:9.7; 95% CI: 3.0-30), co-morbidity (AOR:4.8; 95% CI:1.1-21.7), smoking  
9 history (AOR: 2.2, 95% CI:0.7-7.1), attending the hospital in  $<$ 2 days of symptom onset due  
10 to critical illness (AOR: 4.7; 95% CI:1.2-17.8) and hospital admission (AOR:3.4; 95% CI:  
11 1.2-9.8).  
12  
13  
14  
15  
16  
17  
18

19 **Conclusions** COVID-19 positivity was observed in more than one-third of suspected  
20 COVID-19 patients attending selected hospitals. While managing such patients, the risk  
21 factors identified for higher death rates should be considered.  
22  
23  
24

25 **Key words:** Bangladesh, COVID-19, hospital-based study, SARS-CoV-2, sentinel  
26 surveillance.  
27  
28  
29  
30  
31  
32  
33  
34  
35  
36  
37  
38  
39  
40  
41  
42  
43  
44  
45  
46  
47  
48  
49  
50  
51  
52  
53  
54  
55  
56  
57  
58  
59  
60

### Strengths and limitations of this study

- In collaboration with a government public health institution and an international research organization, we implemented a sentinel surveillance for COVID-19 in resource-constrained settings.
- This is a multicentre study with representative hospitals included from almost all major administrative regions of Bangladesh.
- Our surveillance method was unique in that we shared test results with patients and used a 30-day follow-up plan to track the prognosis of COVID-19 positive patients even after they were discharged from the enrolling hospital. As we did not test any asymptomatic patients and community burden estimation was beyond our scope, the true prevalence of COVID-19 patients might be higher than reported in our study.

## Introduction

Starting from its inception at Wuhan, Hubei Province, China, the novel coronavirus named severe acute respiratory syndrome coronavirus-2 (SARS-CoV-2) has spread across the world within a few months, causing Coronavirus Disease 2019 (COVID-19).<sup>1</sup> Globally, 129,651,305 cases and 2.8 million deaths were recorded till 31<sup>th</sup> March 2021.<sup>2</sup> This virus manifests various clinical characteristics, from asymptomatic infection to severe pneumonia, vasculitis, and death.<sup>3-6</sup> It was declared a public health emergency of international concern (PHEIC) by the world health organization (WHO) in 30<sup>th</sup> January 2020 and subsequently a pandemic on 11<sup>th</sup> March 2020.<sup>7</sup> During that early stage of this coronavirus disease, there was uncertainty and variation regarding the epidemiological, clinical, and virological characteristics of this novel infectious disease. Though COVID-19 cases were reported from 198 countries or regions, and over 400,000 people were confirmed to be infected globally (24<sup>th</sup> March 2020),<sup>8</sup> its transmission dynamics within the human population was unclear, so WHO designed a protocol for the countries to investigate the COVID-19 outbreaks locally and emphasized COVID-19 surveillance to understand the country situation.<sup>9</sup>

Bangladesh, a country in Southeast Asia, exhibited different epidemiological features compared to other countries regarding the influenza virus in terms of seasonality, severity, and mortality.<sup>10,11</sup> On 8<sup>th</sup> March 2020, the first three cases of confirmed COVID-19 were reported in Bangladesh,<sup>12</sup> and subsequently, the number of confirmed cases and deaths increased: at the end of the first month, there were 51 confirmed cases with five deaths from COVID-19.<sup>13</sup> As COVID-19 was a novel virus, there was minimal information regarding its severity and magnitude in Bangladesh.

The government of Bangladesh (GoB) initiated several efforts for the early detection of the virus to mitigate the spread such as screening of passengers at airports, land ports, and maritime ports; hotline system to notify any suspected case of COVID-19 to the Institute of

1  
2  
3 Epidemiology, Disease Control and Research (IEDCR) so that their specimens could be  
4 collected and tested. Moreover, passengers arriving from countries with COVID-19 outbreaks  
5 were screened at the point of entries (PoE) and monitored for any symptom onset for 14 days,  
6 considering the virus's incubation period recommended by the WHO.<sup>14</sup> However, these  
7 efforts were not enough to detect COVID-19 patients, as asymptomatic COVID-19 carriers  
8 already unfolded in their community and spread the virus in different geographical locations  
9 across Bangladesh.<sup>15</sup> Patients with COVID-19 symptoms were reported from different  
10 hospitals and needed to be tested for diagnosis and appropriate treatment purposes.<sup>16</sup> Initially,  
11 there were 10 laboratories in capital Dhaka city and five laboratories outside Dhaka had  
12 COVID-19 testing facility in Bangladesh.<sup>17</sup> Thus, as a part of the pandemic preparedness and  
13 responses, there was an immediate need to establish a hospital-based platform to screen  
14 suspected COVID-19 patients to support GoB in hospitals where PCR-based COVID-19  
15 testing facility was not available. The GoB initiated a countrywide system for detecting  
16 COVID-19 cases by prioritizing divisional hospitals, medical college hospitals, and few  
17 specialized hospitals to screen and test for COVID-19. Moreover, there was a knowledge gap  
18 on clinical and epidemiological data of COVID-19 patients in Bangladesh during the first  
19 wave of the pandemic from any sentinel sites involving multiple public and private hospitals  
20 across the country.

21  
22  
23  
24  
25  
26  
27  
28  
29  
30  
31  
32  
33  
34  
35  
36  
37  
38  
39  
40  
41  
42  
43  
44  
45  
46  
47  
48  
49  
50  
51  
52  
53  
54  
55  
56  
57  
58  
59  
60  
The quality of surveillance data in many developing countries is hampered by a variety of  
factors, including a lack of resources and training.<sup>18</sup> Ibrahim et al. (2020) looked into various  
COVID-19 surveillance activities around the world and categorized them into a systematic  
review paper of thirty articles.<sup>19</sup> Our surveillance falls into a combination of sentinel  
surveillance and enhanced surveillance of hospitalized cases in which risk groups can be  
identified, tested, and followed up on via a hospital and laboratory network. Current  
surveillance included searching for suspected COVID-19 patients among hospitalized



1  
2  
3 patients as well as screening and testing patients from outpatient. In Singapore, a similar  
4  
5 approach was taken for the investigation and confinement efforts for COVID-19.<sup>20,21</sup>  
6  
7

8  
9 To support the containment efforts for COVID-19, the International Centre for Diarrhoeal  
10  
11 Disease Research, Bangladesh (icddr,b) and the Institute of Epidemiology, Disease Control  
12  
13 and Research (IEDCR) under the Bangladesh Ministry of Health and Family Welfare jointly  
14  
15 conducted this surveillance in selected hospitals where there was no nearby PCR based  
16  
17 COVID-19 testing facility. The aim of this study was to establish a hospital-based platform to  
18  
19 describe and analyze epidemiological and clinical characteristics of patients screened for  
20  
21 COVID-19 in selected Bangladeshi hospitals with limited resources during the first wave of  
22  
23 COVID-19 pandemic of the pandemic.  
24  
25  
26  
27  
28  
29

## 30 **Methods**

### 31 ***Setting***

32  
33 The surveillance was conducted at the outpatient department (OPD) and inpatient department  
34  
35 (IPD) of four selected hospitals where patients sought healthcare with suspected COVID-19  
36  
37 symptoms. There were three public hospitals and one private hospital, all of which were in  
38  
39 different geographical locations across Bangladesh (**Figure 1**). The public hospitals namely  
40  
41 Sadar Hospital, Hobiganj (24°22'24.77", 91°25'3.62"), General Hospital, Potuakhali  
42  
43 (22°21'52.19", 90°19'37.25" and District Hospital, Narshingdi (23°55' 48.6", 90°42' 9.84"),  
44  
45 all having 100-250 number of beds. Jahurul Islam Medical College hospital, Kishoregonj  
46  
47 (24°12' 2.26", 90°55'1.81") is a general tertiary level 500 bed teaching hospital. To select  
48  
49 these hospitals, we evaluated the ongoing national hospital-based Influenza surveillance  
50  
51 platforms to identify the hospitals where there was no in-hospital or nearby polymerase chain  
52  
53 reaction (PCR) based COVID-19 testing facility at that time but a high load of potential  
54  
55 suspected COVID-19 patients in that geographical location. It was considered that additional  
56  
57  
58  
59  
60

1  
2  
3 support to these hospitals would strengthen COVID-19 case identification and reporting at  
4  
5 the national level with generation of epidemiological data.  
6  
7

### 8 ***Patient enrolment***

9  
10  
11 Within three months of the first COVID-19 case detection in the country, we deployed two  
12  
13 trained field staff in each selected hospital (total eight field staff placed in four hospitals) for  
14  
15 screening suspected COVID-19 patients among all the patients attending the fever clinic at  
16  
17 OPD and among all inpatients admitted into the specific wards (medicine ward, pediatric  
18  
19 ward, intensive care unit (ICU) and COVID-19 isolation ward). These field staffs worked  
20  
21 with hospital physicians to enroll suspected COVID-19 patients.  
22  
23  
24  
25

26  
27 Case-definition: Field staff actively screened for suspected COVID-19 patients using the  
28  
29 following case definition: patient with any one or more of the following symptoms within last  
30  
31 7 days- fever, cough, sore throat, and respiratory distress. This case definition was applied by  
32  
33 GoB to collect samples as suspected COVID-19 patient.  
34  
35

### 36 ***Data collection***

37  
38  
39 After obtaining written informed consent from patients who met the suspected COVID-19  
40  
41 case definition, field staff collected data on socio-demographics (age, sex, occupation,  
42  
43 educational level), travel history (local or international travel), and clinical characteristics  
44  
45 (presenting symptoms, clinical signs, comorbidity, admission status, smoking history,  
46  
47 duration of symptom onset to treatment seeking) from them. Field staff used proper personal  
48  
49 protective equipment (PPE) such as N95 mask/medical mask, disposable gown, disposable  
50  
51 cap, disposable gloves, face shield and goggles during data and specimen collection. Field  
52  
53 staff used tablet computers to collect data syncing with local icddr,b server using mobile  
54  
55 internet. This system allowed real-time monitoring of the situation across all hospitals by the  
56  
57  
58  
59  
60

1  
2  
3 research team centrally from Dhaka city. After 30 days of enrollment, the surveillance team  
4 (field staff, their supervisor and occasionally, the first author) followed up with each enrolled  
5 patient through mobile phone calls to register the outcome of their illnesses and updated the  
6 database accordingly. The outcome variables were COVID-19 positivity by RT-PCR test and  
7 the mortality among the SARS-CoV-2 infected patients.  
8  
9

### 15 ***Specimen collection and Transportation***

16  
17 Trained field staff collected a single nasopharyngeal swab through swab stick from each  
18 enrolled patients in viral transportation medium (VTM) and stored in a cool box between 2-4  
19 °C temperature. Inhouse (icddr,b lab) VTM preparation was used for the collected samples.  
20  
21 Every afternoon, a dedicated porter transported all the samples to icddr,b, Dhaka using a  
22 private car from three surveillance hospitals except Patuakhali. From Patuakhali, one of the  
23 dedicated porter brought samples to icddr,b by launch (public transport). All VTMs were  
24 handed over to icddr,b virology laboratory within 24 hours of specimen collection.  
25  
26  
27  
28  
29  
30  
31  
32

### 34 ***Laboratory testing***

35  
36 Nasopharyngeal swabs were tested for SARS-CoV-2 at the Virology Laboratory of icddr,b.  
37  
38 Ribonucleic acid (RNA) was extracted from nasopharyngeal swab using QiaAmp Viral RNA  
39 Mini kit (Qiagen, Hilden, Germany). RNA was tested for severe acute respiratory syndrome  
40 coronavirus 2 (SARS-CoV-2) by real-time reverse transcription polymerase chain reaction  
41 (rRT-PCR) targeting SARS-CoV-2 specific ORF1ab- and N-gene. Any person with an rRT-  
42 PCR positive test result was defined as a laboratory-confirmed COVID-19 case/patient.  
43  
44  
45  
46  
47  
48  
49

### 51 ***Reporting to IEDCR, surveillance hospitals, and patients***

52  
53 We received the laboratory test results on the following day of specimen collection. Our  
54 research team then shared the results with respective hospital authorities, district civil  
55 surgeons, divisional health directors, and the director of IEDCR over email. Moreover, we  
56  
57  
58  
59  
60

1  
2  
3 sent a text message (Short Message Service- SMS) to each enrolled patient informing their  
4  
5 test report within 36 hours of specimen collection. Our investigators also responded to every  
6  
7 query when any COVID-19 positive patient called them over the telephone upon getting the  
8  
9 test result. The respective health care facilities then managed the patients following the  
10  
11 existing government system.  
12  
13

### 14 15 ***Data analysis***

16  
17 The data management and analysis were performed using the software Stata v.13 (Stata Corp  
18  
19 LP, College Station, TX, USA). We summarized all categorical variables using frequency  
20  
21 and percentage. We also summarized using mean and standard deviation (SD) for  
22  
23 symmetrically distributed variables and median and interquartile range (IQR) for  
24  
25 asymmetrically distributed variables. We performed Pearson's  $\chi^2$  test to compare the  
26  
27 categorical variables and considered  $p < 0.05$  as statistically significant. We used univariate  
28  
29 logistic regression analysis for strengths of associations and identified risk factors for death,  
30  
31 using odds ratio and adjusted for age and sex in the multivariable model.  
32  
33  
34  
35  
36

### 37 38 ***Ethical consideration***

39  
40 The protocol was reviewed and approved by the institutional review boards (IRB; Research  
41  
42 Review Committee and Ethical Review Committee) of the International Centre for  
43  
44 Diarrhoeal Disease Research, Bangladesh (Ref. number PR-20032). We obtained written,  
45  
46 informed consent of the participants before enrollment. To ensure anonymity of the study  
47  
48 participants and maintain the confidentiality, the names and identifying information of the  
49  
50 participants was and will not be shared with anyone outside of the data collection team and this  
51  
52 information was kept in locked cabinets and/or computers with passwords. Laboratory  
53  
54 specimens were identified only by patient enrolment ID. Necessary permission was obtained  
55  
56 from the respective hospitals before establishing the hospital-based platform and data  
57  
58 collection.  
59  
60

### *Patient and public involvement*

Patients or the public were not involved in the study design, or conduct, or reporting, or dissemination plans.

## **Results**

### *COVID-19 positivity and Demographic characteristics*

During 10<sup>th</sup> June to 31<sup>st</sup> August 2020, we enrolled 2,345 suspected COVID-19 patients from four selected hospitals. Virology Laboratory of icddr,b tested all the 2,345 nasopharyngeal swab samples collected from these enrolled participants; of them, 922 (39.3%) were laboratory-confirmed COVID-19 patients. The median age of the confirmed COVID-19 patients was 38 years (Interquartile range, IQR: 30-50 years), and 654 (71%) were male. COVID-19 was mostly detected among patients aged between 21-40 years (474, 51.3%). About half of the COVID-19 positive patients (467, 50.7%) had a higher level of education (>12 years). We identified 302 (13%) of the patients meeting surveillance case definition were healthcare workers (HCW), and they constituted 83 (9%) of all confirmed COVID-19 patients (**Table 1**).

### *Seasonality and geographical variation*

Over the three months of the surveillance period, the peak of the COVID-19 positivity among suspected COVID-19 patients was detected in the 24<sup>th</sup> and 25<sup>th</sup> epi weeks (2<sup>nd</sup> and 3<sup>rd</sup> week of July 2020). We observed a relatively hard-to-reach riverside area (Patuakhali hospital) reporting the highest number and proportion of cases (355/793; 45%) compared to other hospitals in Narshingdi (313/796; 39%), Kishoreganj (144/462; 31%), and Habiganj (110/294; 37%). The proportion of test positivity over time dropped and gradually started declining from the epi week 28<sup>th</sup> (2<sup>nd</sup> week of August) (**Figure 1 and Figure 2 A, B**).

### *IPD vs. OPD visits*

1  
2  
3 Most of the patients meeting the suspected COVID-19 case definition (2141, 91%) were  
4 identified from the outpatient departments of all the surveillance hospitals, and of them, 865  
5 (40%) were COVID-19 positive. In contrast, among all patients enrolled from the inpatient  
6 departments, 57 (28%) were found COVID-19 positive. Shortness of breath (97, 47% vs. 482,  
7 22%) and vomiting (58, 29% vs. 146, 7%) were more common clinical characteristics of  
8 COVID-19 positive patients admitted in the hospitals compared to COVID-19 patients who  
9 attended at outpatients (**Figure 3B**). However, fever (1163, 54% vs. 82, 40%), sore throat  
10 (869, 41% vs. 18, 9%), runny nose (518, 24% vs. 14, 7%), loss of smell (503, 24% vs. 18,  
11 9%) and joint pain (304, 14% vs. 3, 2%) were more common clinical symptoms in COVID-  
12 19 patients at OPD compared to COVID-19 patients at IPD (All p values <0.05).

### 13 14 15 16 17 18 19 20 21 22 23 24 25 26 27 *Differences in clinical presentation between COVID-19 positive and COVID-19 negative* 28 *patients*

29  
30  
31  
32 The presenting clinical features in all suspected COVID-19 patients varied from dry cough  
33 (most common, 67%, n=1562) to rash (least common, 0.4%, n=9), (**Figure 3A**). We found  
34 fever  $\geq 38^{\circ}$  C (1252, 53% vs. 1077, 44%), loss of taste (964, 41% vs. 711, 30%), headache  
35 (772, 33% vs. 645, 27%), fatigue (696, 30% vs. 499, 21%), loss of smell (528, 23% vs. 295,  
36 13%), nausea/vomiting (431, 18% vs. 340, 15%) and joint pain (314, 13% vs. 223, 9%) were  
37 more likely to be the presenting clinical features among COVID-19 positive patients  
38 compared to the negative patients (all p<0.05). On the other hand, though sore throat was a  
39 very common feature among suspected COVID-19 patients, it was less common in the  
40 COVID-19 positive patients than COVID-19 negative patients (900, 38% vs. 1060, 45%,  
41 p=0.002) (**Figure 3A**).

### 42 43 44 45 46 47 48 49 50 51 52 53 54 55 56 57 *Comorbidities among COVID-19 patients*

58  
59 Compared to COVID-19 negative patients, patients with co-morbidities reported more  
60

1  
2  
3 infection with SARS-CoV-2, such as for chronic liver disease (20, 51% vs. 898, 39%),  
4  
5 cardiovascular disease (116, 43% vs. 801, 39%), and diabetes (164, 48% vs. 755, 38%). Of  
6  
7 these co-morbidities, diabetic patients showed significantly high susceptibility ( $p < 0.05$ ) of  
8  
9 getting infected with SARS-CoV-2 than non-diabetic patients (**Figure 3C**). Other than these  
10  
11 co-morbidities, we also found 19 cancer patients meeting enrolment criteria; of them, four  
12  
13 patients (21%) were COVID-19 positive; and among positive, one (25%) died.  
14  
15

### 16 17 *Mortality and associated risk factors*

18  
19  
20 Among the 922 laboratory-confirmed COVID-19 patients, 21 (2.3%) patients were reported  
21  
22 dead from our routine follow-up after a month of enrolment. Of them, 76% (16/21) patients  
23  
24 died at the same enrolment hospital or different hospitals, 24% (5/21) patients died at home  
25  
26 or on the way to the hospital. From the onset of symptoms, 43% (9/21) of patients died within  
27  
28 7 days, and 95% (20/21) deaths occurred within 15 days (**Supplementary Table 1**). When  
29  
30 we compared epidemiological factors for association with adverse outcome of their clinical  
31  
32 progression, our data showed that death was more likely to occur among patients presenting  
33  
34 with age  $\geq 60$  years (AOR:13.9; 95% CI: 5.5-34.5), shortness of breath (AOR:9.7; 95% CI:  
35  
36 3.0-30), co-morbidity (AOR:4.8; 95% CI: 1.1-21.7), smoking history (AOR:2.2, 95% CI: 0.7-  
37  
38 7.1), attending to a hospital in  $< 2$  days from the onset of symptoms due to critical illness  
39  
40 (AOR: 4.7; 95% CI: 1.2-17.8) and hospital admission (AOR:3.4; 95% CI: 1.2-9.8; **Table 2**).  
41  
42  
43  
44  
45

### 46 47 **Discussion**

48  
49 Our hospital-based COVID-19 sentinel surveillance platform identified more than one-third  
50  
51 (39%) of patients as laboratory-confirmed COVID-19 among the suspected COVID-19  
52  
53 patients attending the hospitals during the study period. This COVID-19 positivity rate was  
54  
55 much higher to draw public health attention compared to WHO reported national data  
56  
57 (19.5%) from 8<sup>th</sup> March to 14<sup>th</sup> September 2020.<sup>22</sup> The national health system intended to  
58  
59  
60

1  
2  
3 collect specimens from symptomatic individuals, but considering resource constrain  
4  
5 verification of symptoms was difficult and thereby some asymptomatic individuals could be  
6  
7 included for testing. Moreover, people seeking a routine COVID-19 PCR test as a  
8  
9 requirement for international travel was also included in the national system for COVID-19  
10  
11 reporting. In contrast, surveillance staff and physicians strictly verified the symptoms  
12  
13 reported by each patient before enrolment and sample collection through the sentinel  
14  
15 surveillance platform. This sentinel surveillance was strictly supervised and monitored by a  
16  
17 team of dedicated researchers for the utmost quality of specimen and data collection from  
18  
19 actual symptomatic patients and rapid transportation of specimens from remote field sites to  
20  
21 central laboratory at Dhaka maintaining recommended standard temperature for rRT-PCR  
22  
23 testing. Thereby, a robust sentinel COVID-19 surveillance is so important to better  
24  
25 understand the actual disease burden in different administrative regions of a country.  
26  
27  
28  
29

30  
31 More than half of our COVID-19 positive patients were young adults within the age group of  
32  
33 21-40 years. This was consistent (46.7%) with the WHO report for Bangladesh on morbidity  
34  
35 and mortality weekly update (MMWU) as of 14th Sept 2020.<sup>22</sup> Among the COVID-19  
36  
37 positive patients, male was predominant. This was consistent with other nearby countries  
38  
39 such as India, where researcher reported that male COVID-19 cases (65.39%) were more  
40  
41 than females (34.61%).<sup>23</sup> This might be due to the male-dominant societies' unique health-  
42  
43 seeking behavior like Bangladesh, where women do not seek healthcare unless severe.<sup>24</sup> This  
44  
45 finding was similar (68% male) during March-April, the early phase of novel coronavirus  
46  
47 detection in Bangladesh.<sup>25</sup> Other than male predominance, more than half of the COVID-19  
48  
49 positive patients were found to be educated for 12 years or more. This might not be the cause  
50  
51 that educated people were more infected than less educated or uneducated; rather it may be  
52  
53 people with higher education were more conscious and thus were coming to hospitals for  
54  
55 testing.  
56  
57  
58  
59  
60



1  
2  
3 Among COVID-19 suspected healthcare workers from our surveillance hospitals, one out of  
4 four was SARS-CoV-2 infected (27%). Chartterjee et. al reported that 5% of symptomatic  
5 HCWs were SARS-COV-2 positive in India.<sup>26</sup> This was not a surprise as healthcare workers  
6 remain vulnerable to infectious disease in any low- and middle-income countries (LMICs)  
7 such as Bangladesh and demand adequate preparedness to fight against COVID-19.<sup>27</sup> Our  
8 findings also support that HCWs were getting infected at a much higher rate than India and,  
9 even more than that of a COVID-19 dedicated tertiary care hospital in Dhaka (11%),<sup>28</sup>  
10 Bangladesh. Thereby, appropriate measures should be taken to prevent primary infection  
11 from patients and secondary infection from colleagues. Appropriate measures such as  
12 Infection Prevention and Control training, adequate PPE supply, and their proper use should  
13 be taken into consideration with high priority to protect HCWs from getting infected from  
14 their workplace.  
15  
16  
17  
18  
19  
20  
21  
22  
23  
24  
25  
26  
27  
28  
29  
30

31 The positivity rate helps public health officials to assess the disease burden at different time  
32 point. COVID-19 positivity rate among the tested patients was increasing till July, followed  
33 by a gradual decline, similar to the country trend as reported by the Director General of  
34 Health Services (DGHS) Bangladesh and World Health Organization report.<sup>29,30</sup> There was a  
35 sharp drop in specimen collection in the first week of August due to “Eid holidays” the  
36 biggest religious festival for Muslims.  
37  
38  
39  
40  
41  
42  
43  
44  
45

46 During the initial days of the COVID-19 crisis, there was a deficiency of adequate data to  
47 make appropriate policy decisions for Bangladesh.<sup>31</sup> Providing timely test reports and feeding  
48 peripheral sites’ data from our surveillance hospitals to the government recording system  
49 greatly enhanced the management of the novel coronavirus crisis. Moreover, our work  
50 generated some key information about the ongoing COVID-19 pandemic in Bangladesh.  
51 COVID-19 suspected patients were found more at OPD than inpatient department, indicating  
52 that patients with COVID-19 symptoms were primarily mild, thereby seeking treatment from  
53  
54  
55  
56  
57  
58  
59  
60

1  
2  
3 the OPD. Clinical features widely vary from asymptomatic infection (40% to 45% of SARS-  
4  
5 CoV-2 infections) to death from acute respiratory distress syndrome (ARDS).<sup>5,6,32</sup> Chinese  
6  
7 researchers reported fever, cough, and expectoration were the commonest symptoms<sup>33</sup> in a  
8  
9 multi-centered study. Another meta-analysis<sup>34</sup> revealed fever (88.7%), cough (57.6%), and  
10  
11 dyspnea (45.6%) were the prominent presentation. We found cough followed by fever as the  
12  
13 top two presenting symptoms of COVID-19 patients. Additionally, sore throat, loss of taste  
14  
15 and loss of smell, headache, muscle& joint pain were more likely to occur among laboratory-  
16  
17 confirmed COVID-19 patients. Nothing conclusive, but these differences could be used  
18  
19 carefully by the treating physicians to manage a suspected COVID-19 patient initially before  
20  
21 getting the lab report.  
22  
23  
24  
25

26  
27 Comorbidities play a crucial role towards disease progression. Diabetes was the most  
28  
29 commonly reported factor towards the adverse outcome of COVID-19 patients and their  
30  
31 disease progression,<sup>35</sup> requiring more hospitalization in the ICU and associated with more  
32  
33 death compared to non-diabetic COVID-19 patients.<sup>36</sup> Our surveillance data showed that  
34  
35 diabetic patients were more susceptible to get a COVID-19 infection than others. So, besides  
36  
37 other co-morbidities such as cardiovascular diseases, clinicians should consider additional  
38  
39 clinical measures to manage a COVID-19 positive diabetic patient.  
40  
41  
42  
43

44 Mortality rate is one of the key indicators in public health. Our surveillance data revealed  
45  
46 that the percentage of death among our COVID-19 positive patients was a little higher  
47  
48 (2.3%), than the global average death rate (2.2%) as of 22<sup>nd</sup> March 2021.<sup>2</sup> This death rate  
49  
50 was possible to capture due to the unique post-discharge telephone follow up of enrolled  
51  
52 patients after 30 days of enrollment for their outcome. Among all COVID-19 positive  
53  
54 patients identified through the surveillance, we detected only 28% death from the  
55  
56 surveillance hospitals, the remaining 72% deaths were possible to capture from this unique  
57  
58 follow-up strategy of our sentinel surveillance system.  
59  
60

1  
2  
3 We observed, elderly, co-morbidity, having breathing difficulty, smoking, and  
4 admission in the inpatient department due to more severe illness were more likely to be the  
5 risk factors for death among the SARS-CoV-2 infected patients. Regarding gender, Italy  
6 reported more death among men than women.<sup>37</sup> Nationally, Bangladesh has more COVID-19  
7 deaths among men (76%) than women (24%),<sup>38</sup> but we did not find any significant difference  
8 in death rate between males and females from our surveillance. A nationwide analysis in  
9 China showed that age between 65 and 74 years, coronary heart disease, cerebrovascular  
10 disease, dyspnea were independent risk factors associated with fatal outcome.<sup>39</sup> China CDC  
11 analyzed 44,000 COVID patients' data and reported elderly, diabetes, cardiovascular disease,  
12 hypertension and chronic respiratory disease were all associated with an increased risk of  
13 death.<sup>40</sup> In the United Kingdom, people aged over 70 years with cardiovascular and  
14 respiratory diseases were considered as high-risk group.<sup>41</sup> Smoking was associated with  
15 increased risks of COVID-19 death and disease progression, a finding similar to other  
16 studies.<sup>42-45</sup> The WHO also mentioned increased severity of disease and mortality in  
17 hospitalized COVID-19 patients among smokers.<sup>46</sup> One meta-analysis reported a pooled OR  
18 of 1.89 (95% CI: 1.10-3.24) on the severity of this disease among smokers than non-  
19 smokers.<sup>44</sup> Another systematic review reported a significant association between smoking  
20 and the progression of COVID-19 (OR: 1.91; 95% CI: 1.42-2.59); the authors commented  
21 that the actual risk of smoking might be higher.<sup>47</sup> Thereby, for a better outcome from  
22 COVID-19 infection during this pandemic smoking should be avoided. The surveillance data  
23 also showed more deaths occurred among critically ill hospitalized patients, which is natural.  
24 Thereby, an improved referral system from a district-level hospital to a tertiary level or  
25 specialized hospital could be considered for high-risk patients, which might reduce mortality.  
26  
27 Despite all efforts, our work had certain limitations. Based on our available resources and  
28 government priority, we conducted this surveillance at only four hospitals in different  
29  
30  
31  
32  
33  
34  
35  
36  
37  
38  
39  
40  
41  
42  
43  
44  
45  
46  
47  
48  
49  
50  
51  
52  
53  
54  
55  
56  
57  
58  
59  
60

1  
2  
3 locations and enrolled suspected patients for three months only, with an additional one-month  
4  
5 follow-up period. Thus, our findings might not be generalized for the whole Bangladeshi  
6  
7 population. Moreover, we might have missed the true prevalence of COVID-19 patients as  
8  
9 we did not screen any asymptomatic patients. We only reported hospital-based prevalence  
10  
11 because it was beyond the scope of this platform to estimate the community burden of  
12  
13 COVID-19 in Bangladesh.  
14  
15  
16

## 17 **Conclusion**

18  
19  
20 Of the patients attending the surveillance hospitals with COVID-19 symptoms during the  
21  
22 reporting period, more than one-third had a laboratory-confirmed COVID-19 and, this was  
23  
24 more common among outpatients with peak positivity in July. Elderly population, shortness  
25  
26 of breath, co-morbid condition, smoking history, severe illness requiring hospital treatment  
27  
28 were identified as the factors associated with death among COVID-19 patients. Policymakers  
29  
30 may consider a system for the early identification of the COVID-19 positive individuals at  
31  
32 high risk to provide special care with time appropriate treatment. Our effort strengthened  
33  
34 government's capacity for rapid case detection, reporting, and quick containment efforts.  
35  
36 Continuing this sentinel surveillance platform can better characterize disease patterns in  
37  
38 populations over time, thus support the government by assessing the magnitude of the health  
39  
40 problem and developing a data-driven effective management strategy as well as can monitor  
41  
42 the progress towards the reduction of COVID-19 cases after vaccination campaign for SARS-  
43  
44 CoV-2.  
45  
46  
47  
48  
49  
50  
51  
52  
53  
54  
55  
56  
57  
58  
59  
60

1  
2  
3 **Contributors:** The study concept was developed by FC and PD. The protocol was drafted by  
4  
5 PD and critically revised by FC, SB, MR (Mahmudur Rahman), MR (Mahbubur Rahman),  
6  
7 AA, TS, and MF. Data extraction and quality assessment was performed by ZA, SM AI and  
8  
9 PD. Laboratory aspect was managed by ZR and MR (Mustafizur Rahman). PD developed the  
10  
11 first draft manuscript. MR (Mahbubur Rahman), MB, SB, and all other authors provided  
12  
13 feedback for all sections of the protocol including the design, analysis and revising the  
14  
15 manuscript. All authors have approved the final version of the manuscript.  
16  
17

18  
19 **Data availability statement:** Data cannot be made publicly available because these are  
20  
21 confidential. Data are available from the respective department of icddr,b ([www.icddr.org](http://www.icddr.org))  
22  
23 for researchers who meet the criteria for access to confidential data.  
24  
25

26 **Data sharing statement:** No additional data available.  
27

28 **Disclaimer:** Our funding sources had no role in the design of the protocol, and was not  
29  
30 involved during the methodological execution, data analyses and interpretation and decision  
31  
32 to submit or to publish the study results.  
33  
34

35  
36 **Patient and public involvement:** Due to the design of this study, it was not appropriate to  
37  
38 involve patients and/or the public themselves in the design, or conduct, or reporting, or  
39  
40 dissemination plans of this research.  
41  
42

43 **Ethics statements:** The protocol was reviewed and approved by the institutional review  
44  
45 boards (IRB; Research Review Committee and Ethical Review Committee) of the  
46  
47 International Centre for Diarrhoeal Disease Research, Bangladesh (icddr,b). We obtained  
48  
49 written, informed consent of the participants before enrollment.  
50  
51

52  
53 **Funding:** This research protocol was funded by The Foreign, Commonwealth &  
54  
55 Development Office (FCDO – former DFID) of the UK Government (01831) and the United  
56  
57 States Agency for International Development (USAID) under the terms of USAID's Alliance  
58  
59  
60

1  
2  
3 for Combating TB in Bangladesh activity cooperative agreement no. CA #  
4  
5 72038820CA00002.  
6  
7

8 **Acknowledgement:** This research protocol was funded by The Foreign, Commonwealth &  
9  
10 Development Office (FCDO – former DFID) of the UK Government and the United States  
11  
12 Agency for International Development (USAID) under the terms of USAID’s Alliance for  
13  
14 Combating TB in Bangladesh activity cooperative agreement no. CA # 72038820CA00002.  
15  
16 Views expressed herein do not necessarily reflect the views of the U.S. Government or  
17  
18 USAID. icddr,b acknowledges with gratitude the commitment of FCDO and USAID to its  
19  
20 research efforts. icddr,b is also grateful to the Governments of Bangladesh, Canada, Sweden  
21  
22 and the UK for providing core/unrestricted support.  
23  
24  
25  
26

27 **Conflicts of Interest:** The authors declare no conflict of interest.  
28  
29  
30  
31  
32  
33  
34  
35  
36  
37  
38  
39  
40  
41  
42  
43  
44  
45  
46  
47  
48  
49  
50  
51  
52  
53  
54  
55  
56  
57  
58  
59  
60

## References

1. Cheng ZJ, Shan J. 2019 Novel coronavirus: where we are and what we know. *Infection*. 2020;48(2):155-163. doi:10.1007/s15010-020-01401-y
2. Worldometer. Coronavirus Update (Live): Cases and Deaths from COVID-19 Virus Pandemic. Accessed April 1, 2021. <https://www.worldometers.info/coronavirus/>
3. Huang C, Wang Y, Li X, et al. Clinical features of patients infected with 2019 novel coronavirus in Wuhan, China. *Lancet*. Published online 2020. doi:10.1016/S0140-6736(20)30183-5
4. Leung C. Clinical features of deaths in the novel coronavirus epidemic in China. *Rev Med Virol*. 2020;30(3). doi:10.1002/rmv.2103
5. Hassan SA, Sheikh FN, Jamal S, Ezeh JK, Akhtar A. Coronavirus (COVID-19): A Review of Clinical Features, Diagnosis, and Treatment. *Cureus*. Published online March 2020. doi:10.7759/cureus.7355
6. Oran DP, Topol EJ. Prevalence of Asymptomatic SARS-CoV-2 Infection : A Narrative Review. *Ann Intern Med*. Published online 2020. doi:10.7326/M20-3012
7. WHO Timeline - COVID-19.
8. COVID-19 Map - Johns Hopkins Coronavirus Resource Center. Accessed March 25, 2020. <https://coronavirus.jhu.edu/map.html>
9. The first few X cases and contacts (FFX) investigation protocol for coronavirus disease 2019 (COVID-19), version 2.2. Accessed November 15, 2020. [https://www.who.int/publications/i/item/the-first-few-x-cases-and-contacts-\(-ffx\)-investigation-protocol-for-coronavirus-disease-2019-\(-covid-19\)-version-2.2](https://www.who.int/publications/i/item/the-first-few-x-cases-and-contacts-(-ffx)-investigation-protocol-for-coronavirus-disease-2019-(-covid-19)-version-2.2)
10. Ahmed M, Aleem MA, Roguski K, et al. Estimates of seasonal influenza-associated mortality in Bangladesh, 2010-2012. *Influenza Other Respi Viruses*. Published online 2018. doi:10.1111/irv.12490
11. Zaman RU, Alamgir ASM, Rahman M, et al. Influenza in outpatient ILI case-patients in national hospital-based surveillance, Bangladesh, 2007-2008. *PLoS One*. Published online 2009. doi:10.1371/journal.pone.0008452
12. Islam MT, Talukder AK, Siddiqui MN, Islam T. Tackling the COVID-19 pandemic: the Bangladesh perspective. *J Public Health Res*. Published online 2020. doi:10.4081/jphr.2020.1794
13. Bangladesh Coronavirus: 430,496 Cases and 6,173 Deaths - Worldometer. Accessed November 15, 2020. <https://www.worldometers.info/coronavirus/country/bangladesh/>
14. WHO. Updated WHO recommendations for international traffic in relation to COVID-19 outbreak. Accessed September 2, 2021. <https://www.who.int/news-room/articles-detail/updated-who-recommendations-for-international-traffic-in-relation-to-covid-19-outbreak>
15. MA M. Exploring factors in fear of COVID-19 and its GIS-based nationwide distribution: the case of Bangladesh. *BJPsych open*. 2021;7(5). doi:10.1192/BJO.2021.984
16. S M-E-M, MZ H, MAAJ B, et al. Use of Antimicrobials among Suspected COVID-19 Patients at

- 1  
2  
3 Selected Hospitals, Bangladesh: Findings from the First Wave of COVID-19 Pandemic. *Antibiot*  
4 *(Basel, Switzerland)*. 2021;10(6). doi:10.3390/ANTIBIOTICS10060738  
5
- 6 17. Covid-19 tests: Technicians to be trained on PCR machines. Accessed September 2, 2021.  
7 [https://thefinancialexpress.com.bd/health/covid-19-tests-technicians-to-be-trained-on-pcr-](https://thefinancialexpress.com.bd/health/covid-19-tests-technicians-to-be-trained-on-pcr-machines-1585971746)  
8 [machines-1585971746](https://thefinancialexpress.com.bd/health/covid-19-tests-technicians-to-be-trained-on-pcr-machines-1585971746)  
9
- 10 18. Summ ML-MS, 2012 undefined. Global health surveillance. *cdc.gov*. Accessed September 23,  
11 2021. <https://www.cdc.gov/mmWR/preview/mmwrhtml/su6103a4.htm>  
12
- 13 19. Ibrahim NK. Epidemiologic surveillance for controlling Covid-19 pandemic: types, challenges  
14 and implications. *J Infect Public Health*. 2020;13(11):1630-1638.  
15 doi:10.1016/J.JIPH.2020.07.019  
16
- 17 20. Ng Y, Li Z, Chua YX, et al. Evaluation of the Effectiveness of Surveillance and Containment  
18 Measures for the First 100 Patients with COVID-19 in Singapore — January 2–February 29,  
19 2020. *MMWR Morb Mortal Wkly Rep*. 2020;69(11):307-311. doi:10.15585/mmwr.mm6911e1  
20
- 21 21. Pung R, Chiew CJ, Young BE, et al. Investigation of three clusters of COVID-19 in Singapore:  
22 implications for surveillance and response measures. *Lancet*. 2020;395(10229):1039-1046.  
23 doi:10.1016/S0140-6736(20)30528-6  
24
- 25 22. COVID-19 Bangladesh situation reports. WHO Bangladesh. Accessed September 23, 2021.  
26 [https://cdn.who.int/media/docs/default-source/searo/bangladesh/covid-19-who-](https://cdn.who.int/media/docs/default-source/searo/bangladesh/covid-19-who-bangladesh-situation-reports/who-covid-19-update-29-20200914.pdf?sfvrsn=bd0e839f_2)  
27 [bangladesh-situation-reports/who-covid-19-update-29-20200914.pdf?sfvrsn=bd0e839f\\_2](https://cdn.who.int/media/docs/default-source/searo/bangladesh/covid-19-who-bangladesh-situation-reports/who-covid-19-update-29-20200914.pdf?sfvrsn=bd0e839f_2)  
28
- 29 23. Kushwaha S, Khanna P, Rajagopal V, Kiran T. Biological attributes of age and gender variations  
30 in Indian COVID-19 cases: A retrospective data analysis. *Clin Epidemiol Glob Heal*. 2021;11.  
31 doi:10.1016/J.CEGH.2021.100788  
32
- 33 24. Ahmed SM, Adams AM, Chowdhury M, Bhuiya A. Gender, socioeconomic development and  
34 health-seeking behaviour in Bangladesh. *Soc Sci Med*. Published online 2000.  
35 doi:10.1016/S0277-9536(99)00461-X  
36
- 37 25. More men than women dying in BD from coronavirus. Accessed November 24, 2020.  
38 [https://www.thefinancialexpress.com.bd/national/more-men-than-women-dying-in-bd-](https://www.thefinancialexpress.com.bd/national/more-men-than-women-dying-in-bd-from-coronavirus-1587215821)  
39 [from-coronavirus-1587215821](https://www.thefinancialexpress.com.bd/national/more-men-than-women-dying-in-bd-from-coronavirus-1587215821)  
40
- 41 26. Chatterjee P, Anand T, Singh K, et al. Healthcare workers & SARS-CoV-2 infection in India: A  
42 case-control investigation in the time of COVID-19. *Indian J Med Res*. Published online 2020.  
43 doi:10.4103/ijmr.IJMR\_2234\_20  
44
- 45 27. Hassan MZ, Monjur MR, Styczynski AR. Protecting front line health care workers should be  
46 the top priority in low-resource health systems: Case of Bangladesh. *Infect Control Hosp*  
47 *Epidemiol*. Published online 2020:1. doi:10.1017/ice.2020.208  
48
- 49 28. Yasmin R, Parveen R, Azad N Al, et al. Corona Virus Infection among Healthcare Workers in a  
50 COVID Dedicated Tertiary Care Hospital in Dhaka, Bangladesh. *J Bangladesh Coll Physicians*  
51 *Surg*. Published online 2020. doi:10.3329/jbcps.v38i0.47442  
52
- 53 29. COVID-19 Dashboard, Bangladesh. Accessed September 23, 2021.  
54 <http://dashboard.dghs.gov.bd/webportal/pages/covid19.php>  
55
- 56 30. Bangladesh: WHO Coronavirus Disease (COVID-19) Dashboard With Vaccination Data | WHO  
57 Coronavirus (COVID-19) Dashboard With Vaccination Data. Accessed September 23, 2021.  
58  
59  
60



- 1  
2  
3 <https://covid19.who.int/region/searo/country/bd>  
4  
5 31. Huq S, Biswas RK. COVID-19 in Bangladesh: Data deficiency to delayed decision. *J Glob Health*.  
6 2020;10(1). doi:10.7189/jogh.10.010342  
7  
8 32. Manabe T, Akatsu H, Kotani K, Kudo K. Trends in clinical features of novel coronavirus disease  
9 (COVID-19): A systematic review and meta-analysis of studies published from December 2019  
10 to February 2020. *Respir Investig*. 2020;58(5):409-418. doi:10.1016/j.resinv.2020.05.005  
11  
12 33. Yang W, Cao Q, Qin L, et al. Clinical characteristics and imaging manifestations of the 2019  
13 novel coronavirus disease (COVID-19): A multi-center study in Wenzhou city, Zhejiang, China. *J*  
14 *Infect*. Published online 2020. doi:10.1016/j.jinf.2020.02.016  
15  
16 34. Rodriguez-Morales AJ, Cardona-Ospina JA, Gutiérrez-Ocampo E, et al. Clinical, laboratory and  
17 imaging features of COVID-19: A systematic review and meta-analysis. *Travel Med Infect Dis*.  
18 Published online 2020. doi:10.1016/j.tmaid.2020.101623  
19  
20 35. Cen Y, Chen X, Shen Y, et al. Risk factors for disease progression in patients with mild to  
21 moderate coronavirus disease 2019—a multi-centre observational study. *Clin Microbiol*  
22 *Infect*. Published online 2020. doi:10.1016/j.cmi.2020.05.041  
23  
24 36. Shi Q, Zhang X, Jiang F, et al. Clinical Characteristics and Risk Factors for Mortality of COVID-  
25 19 Patients With Diabetes in Wuhan, China: A Two-Center, Retrospective Study. *Diabetes*  
26 *Care*. 2020;43(7):1382-1391. doi:10.2337/dc20-0598  
27  
28 37. Livingston E, Bucher K. Coronavirus Disease 2019 (COVID-19) in Italy. *JAMA*. Published online  
29 2020. doi:10.1001/jama.2020.4344  
30  
31 38. MIS, DGHS, Bangladesh. Accessed January 2, 2021.  
32 <https://dghs.gov.bd/index.php/bd/component/content/article?layout=edit&id=5612>  
33  
34 39. Chen R, Liang W, Jiang M, et al. Risk Factors of Fatal Outcome in Hospitalized Subjects With  
35 Coronavirus Disease 2019 From a Nationwide Analysis in China. *Chest*. 2020;158(1):97-105.  
36 doi:10.1016/j.chest.2020.04.010  
37  
38 40. Wu Z, McGoogan JM. Characteristics of and Important Lessons from the Coronavirus Disease  
39 2019 (COVID-19) Outbreak in China: Summary of a Report of 72314 Cases from the Chinese  
40 Center for Disease Control and Prevention. *JAMA - J Am Med Assoc*. Published online 2020.  
41 doi:10.1001/jama.2020.2648  
42  
43 41. Public Health England. Seasonal flu vaccine uptake in GP patients: winter 2018 to 2019 -  
44 GOV.UK. Accessed November 25, 2020. [https://www.gov.uk/government/statistics/seasonal-](https://www.gov.uk/government/statistics/seasonal-flu-vaccine-uptake-in-gp-patients-winter-2018-to-2019)  
45 [flu-vaccine-uptake-in-gp-patients-winter-2018-to-2019](https://www.gov.uk/government/statistics/seasonal-flu-vaccine-uptake-in-gp-patients-winter-2018-to-2019)  
46  
47 42. Huang R, Zhuid L, Xue L, et al. Clinical findings of patients with coronavirus disease 2019 in  
48 Jiangsu Province, China: A retrospective, multi-center study. *PLoS Negl Trop Dis*. Published  
49 online 2020. doi:10.1371/journal.pntd.0008280  
50  
51 43. Wang D, Hu B, Hu C, et al. Clinical Characteristics of 138 Hospitalized Patients with 2019  
52 Novel Coronavirus-Infected Pneumonia in Wuhan, China. *JAMA - J Am Med Assoc*. Published  
53 online 2020. doi:10.1001/jama.2020.1585  
54  
55 44. Guo FR. Smoking links to the severity of COVID-19: An update of a meta-analysis. *J Med Virol*.  
56 2020;92(11):2304-2305. doi:10.1002/jmv.25967  
57  
58  
59  
60

- 1  
2  
3 45. Vardavas CI, Nikitara K. COVID-19 and smoking: A systematic review of the evidence. *Tob*  
4 *Induc Dis*. Published online 2020. doi:10.18332/tid/119324  
5  
6 46. Smoking and COVID-19. WHO. Accessed January 2, 2021. [https://www.who.int/news-](https://www.who.int/news-room/commentaries/detail/smoking-and-covid-19)  
7 [room/commentaries/detail/smoking-and-covid-19](https://www.who.int/news-room/commentaries/detail/smoking-and-covid-19)  
8  
9 47. Patanavanich R, Glantz SA. Smoking Is Associated With COVID-19 Progression: A Meta-  
10 analysis. *Nicotine Tob Res*. Published online 2020. doi:10.1093/ntr/ntaa082  
11  
12  
13  
14  
15  
16  
17  
18  
19  
20  
21  
22  
23  
24  
25  
26  
27  
28  
29  
30  
31  
32  
33  
34  
35  
36  
37  
38  
39  
40  
41  
42  
43  
44  
45  
46  
47  
48  
49  
50  
51  
52  
53  
54  
55  
56  
57  
58  
59  
60

For peer review only

**Table 1.** Socio-demographic characteristics of suspected COVID-19 patients in selected hospitals of Bangladesh, June-August 2020

| Characteristics       | Suspected COVID-19 patients (N=2345) | SARS-CoV-2 Positive by rRT-PCR |                      |                         |
|-----------------------|--------------------------------------|--------------------------------|----------------------|-------------------------|
|                       |                                      | Total Positive (922)           | Inpatient (57) n (%) | Out-patient (865) n (%) |
| <b>Age (in years)</b> |                                      |                                |                      |                         |
| Median (IQR)          | 35 (26-48)                           | 38 (30-50)                     | 55 (45-69)           | 38 (29-48)              |
| <b>Age sub-groups</b> |                                      |                                |                      |                         |
| 0-5                   | 25 (1.11)                            | 6 (0.7)                        | 1 (1.7)              | 5 (0.6)                 |
| 6-10                  | 30 (1.3)                             | 11 (1.2)                       | 0 (0)                | 11 (1.3)                |
| 11-20                 | 167 (7.1)                            | 42 (4.5)                       | 0 (0)                | 42 (4.8)                |
| 21-30                 | 684 (29.1)                           | 228 (24.7)                     | 5 (8.7)              | 223 (25.8)              |
| 31-40                 | 594 (25.3)                           | 246 (26.6)                     | 6 (10.5)             | 240 (27.7)              |
| 41-50                 | 382 (16.3)                           | 182 (19.7)                     | 11 (19.3)            | 171 (19.7)              |
| 51-60                 | 267 (11.4)                           | 125 (13.5)                     | 8 (14.0)             | 117 (13.5)              |
| 60+                   | 196 (8.3)                            | 82 (8.8)                       | 26 (45.6)            | 56 (6.5)                |
| <b>Sex</b>            |                                      |                                |                      |                         |
| Male                  | 1590 (67.8)                          | 654 (70.9)                     | 38 (66.7)            | 616 (71.2)              |
| <b>Occupation</b>     |                                      |                                |                      |                         |
| HCW                   | 302 (12.9)                           | 83 (9.0)                       | 2 (3.5)              | 81 (9.4)                |
| Service               | 946 (40.3)                           | 431 (46.8)                     | 7 (12.3)             | 424 (49.0)              |
| Business              | 154 (6.6)                            | 82 (8.9)                       | 6 (10.5)             | 76 (8.8)                |
| Student               | 223 (9.5)                            | 68 (7.4)                       | 0 (0)                | 68 (7.9)                |
| Dependent             | 215 (9.1)                            | 73 (7.9)                       | 22 (38.6)            | 51 (5.9)                |
| Unemployed            | 145 (6.1)                            | 64 (6.9)                       | 9 (15.8)             | 55 (6.3)                |
| Others*               | 360 (15.3)                           | 121 (13.1)                     | 11 (19.3)            | 110 (12.7)              |

| Education (years)   |             |            |           |            |
|---------------------|-------------|------------|-----------|------------|
| No formal schooling | 155 (6.6)   | 44 (4.8)   | 11 (19.3) | 33 (3.8)   |
| 1-5                 | 255 (10.9)  | 89 (9.7)   | 11 (19.3) | 78 (9.0)   |
| 6-10                | 496 (21.2)  | 178 (19.3) | 22 (38.6) | 156 (18.0) |
| 11-12               | 367 (15.7)  | 144 (15.6) | 7 (12.3)  | 137 (15.8) |
| >12                 | 1072 (45.6) | 467 (50.7) | 6 (10.5)  | 461 (53.4) |

\*Farmer, day-labour, small shop owner, rickshaw/van puller, driver etc.

**Table 2.** Factors associated with adverse outcome (death) among COVID-19 positive patients in selected hospitals of Bangladesh, June-August 2020.

| Factors              | Frequency<br>N=922 | Death<br>n=21<br>Frequency (%) | Odds ratio<br>OR (95% CI) | Adjusted odds<br>ratio<br>AOR (95% CI) |
|----------------------|--------------------|--------------------------------|---------------------------|----------------------------------------|
| Age*                 | 0-59 years         | 812                            | 8 (1%)                    | 1                                      |
|                      | ≥ 60 years         | 110                            | 13 (11.8%)                | 13.5 (5.4-33.3)                        |
| Sex                  | Male               | 654                            | 14 (2.1%)                 | 1                                      |
|                      | Female             | 268                            | 7 (2.6%)                  | 1.2 (0.5-3.0)                          |
| Health care worker   | Yes                | 83                             | 0 (0%)                    | 1                                      |
|                      | No                 | 839                            | 21 (2.5%)                 | -                                      |
| Symptoms             | ≤3 symptoms        | 314                            | 7 (2.2%)                  | 1                                      |
|                      | >3 symptoms        | 608                            | 14 (2.3%)                 | 1.0 (0.4-2.5)                          |
| Shortness of breath* | No                 | 700                            | 4 (0.6%)                  | 1                                      |
|                      | Yes                | 222                            | 17 (7.7%)                 | 14.4 (4.8-43)                          |
| Comorbidity*         | No                 | 538                            | 2 (0.4%)                  | 1                                      |
|                      | Yes                | 384                            | 19 (4.9%)                 | 13.9 (3.2-60)                          |
| History of smoking   | No                 | 812                            | 14 (1.7%)                 | 1                                      |
|                      | Yes                | 110                            | 7 (6.4%)                  | 3.9 (1.5-9.8)                          |
| Treatment received*  | OPD                | 865                            | 12 (1.4%)                 | 1                                      |
|                      | inpatient          | 57                             | 9 (15.8%)                 | 13.3 (5.3-33)                          |

|                      |          |     |           |                |                |
|----------------------|----------|-----|-----------|----------------|----------------|
| Duration of hospital | ≥ 2 days | 880 | 17 (1.9%) | 1              | 1              |
| attendance from the  | < 2 days | 42  | 4 (9.8%)  | 5.4 (1.8-17.1) | 4.7 (1.2-17.8) |
| onset of symptom*    |          |     |           |                |                |

*\*Factors with a significant difference between groups*

For peer review only

1  
2  
3  
4  
5  
6  
7  
8  
9  
10  
11  
12  
13  
14  
15  
16  
17  
18  
19  
20  
21  
22  
23  
24  
25  
26  
27  
28  
29  
30  
31  
32  
33  
34  
35  
36  
37  
38  
39  
40  
41  
42  
43  
44  
45  
46  
47  
48  
49  
50  
51  
52  
53  
54  
55  
56  
57  
58  
59  
60

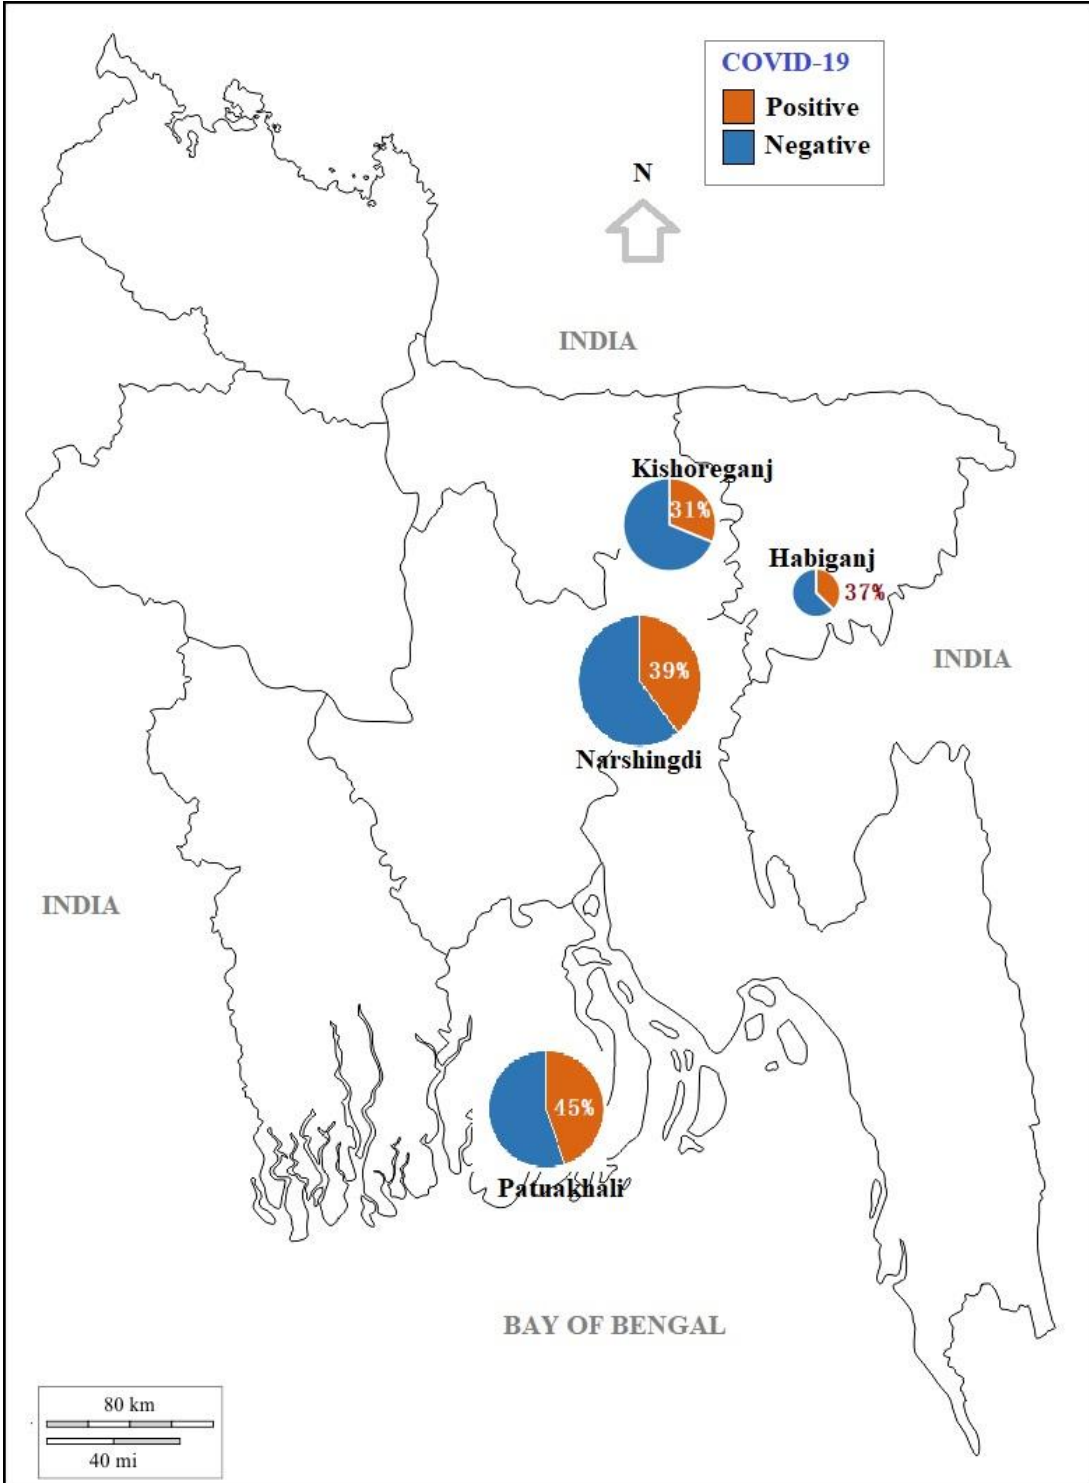

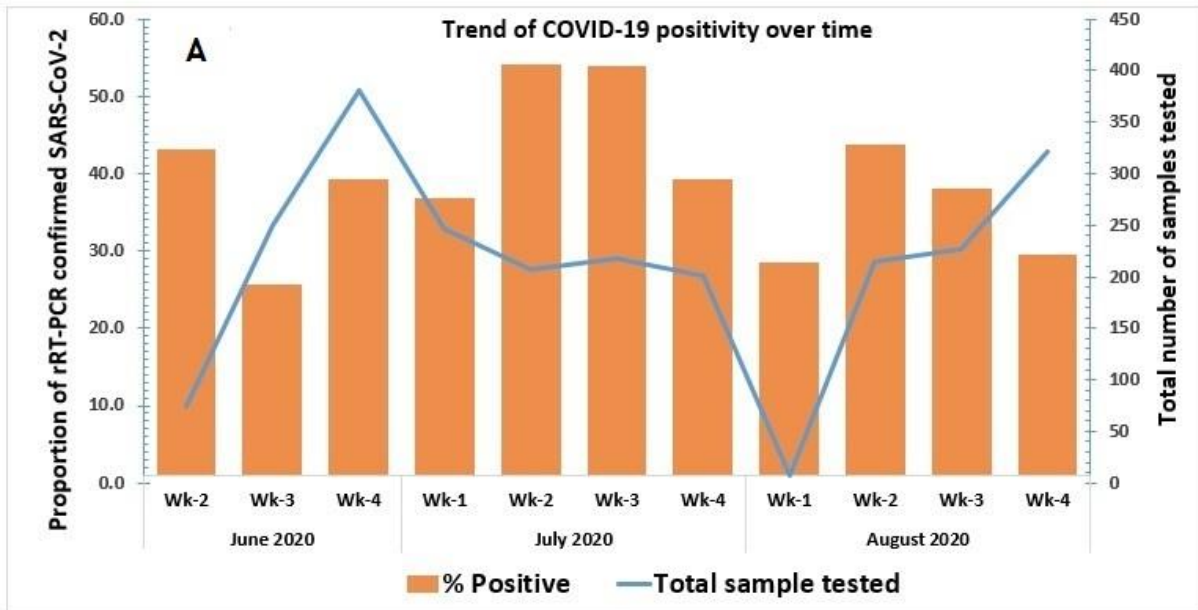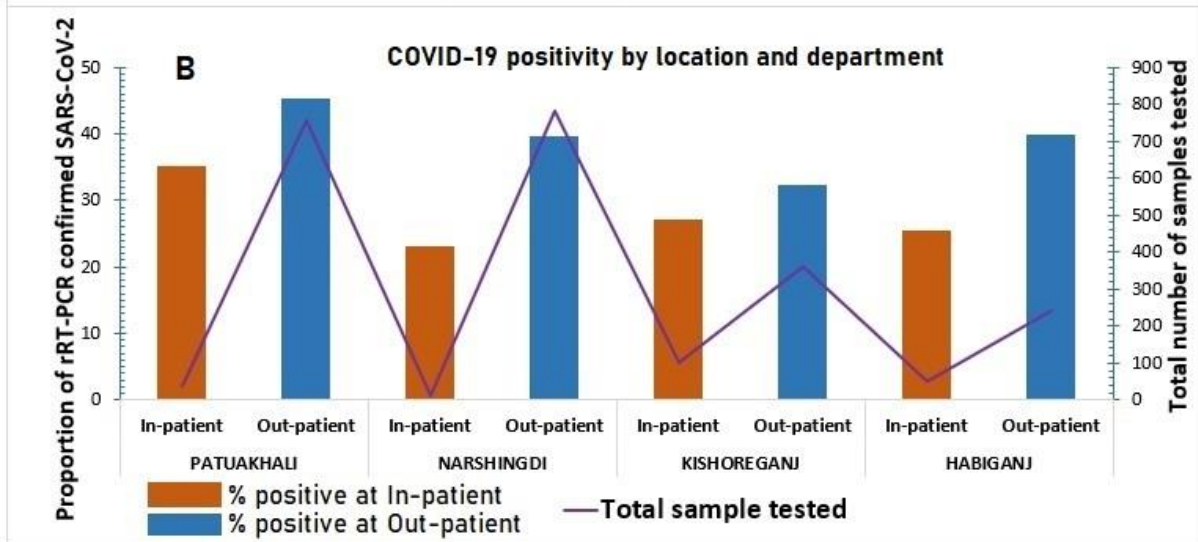

only

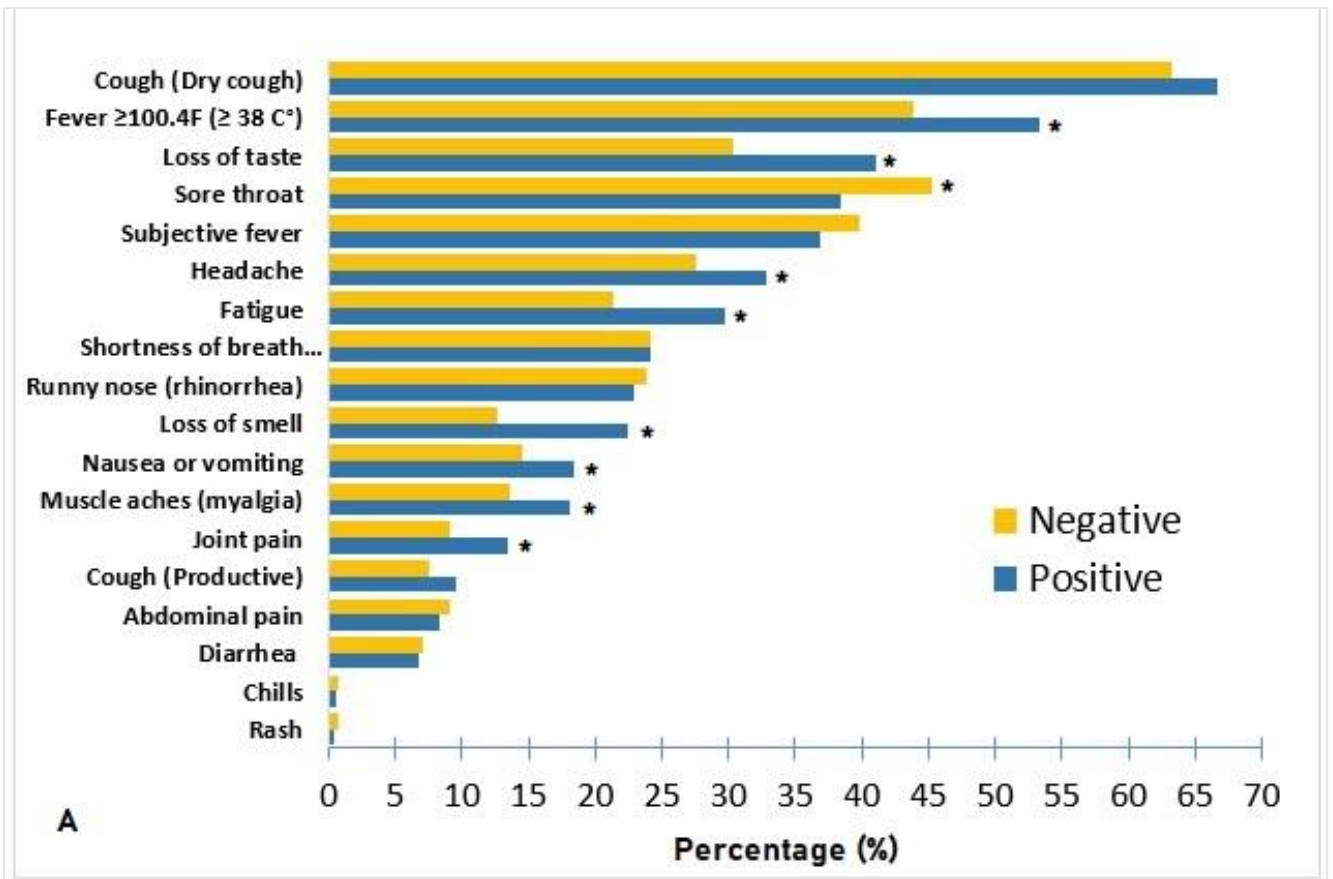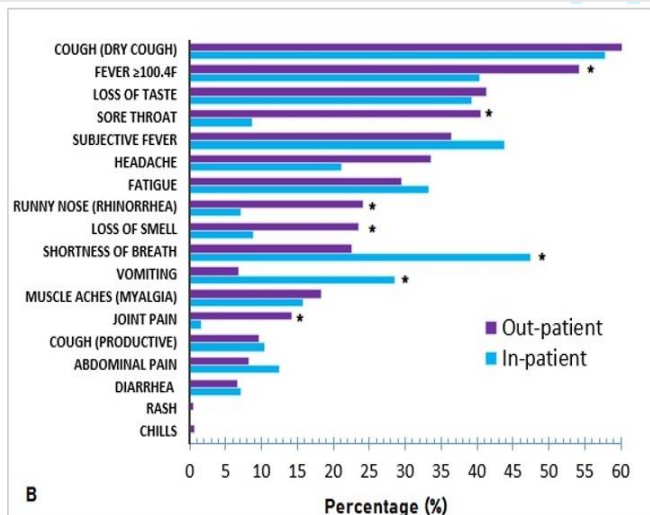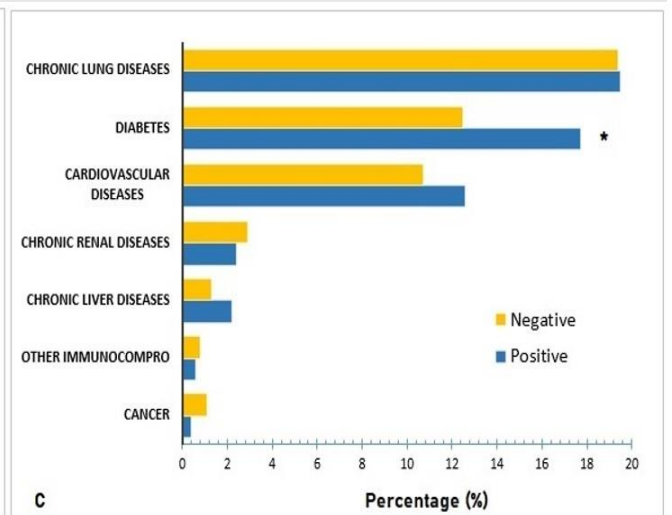



**Supplementary table 1.** Distribution of deaths among COVID-19 positive patients in selected hospitals of Bangladesh, June-August 2020.

|                                                           | Hospital death<br>n= 16 | Home death<br>n=5              |
|-----------------------------------------------------------|-------------------------|--------------------------------|
| <b>Age (years)</b>                                        |                         |                                |
| Lowest, highest                                           | 40, 85                  | 51, 90                         |
| Median (IQR)                                              | 65 (55-69)              | 64 (52-70)                     |
| <b>Sex</b>                                                |                         |                                |
| Male                                                      | 11 (69)                 | 3 (60)                         |
| <b>Timing of death from symptom onset</b>                 |                         |                                |
| 0-7 days                                                  | 6 (38)    6 (38) Cum.   | 3 (60)    3 (60) Cum.          |
| 8-15 days                                                 | 9 (56)    15 (94)       | 2 (40)    5 (100)              |
| 16-40 days                                                | 1 (6)    16 (100)       |                                |
| <b>Manner of death</b>                                    |                         |                                |
| Disease                                                   | 16                      | 5 (100)                        |
| Accident                                                  | 0                       | 0                              |
| Sudden death (heart attack)                               | 0                       | 0                              |
| <b>Comorbidity present (anyone)</b>                       | 15 (94%)                | 4 (80)                         |
| DM                                                        | 9 (56)                  | 2 (40)                         |
| Asthma/COPD                                               | 4 (25)                  | 2 (40)                         |
| Heart disease/HTN                                         | 6 (37)                  | 2 (40)                         |
| Chronic renal disease                                     | 4 (25)                  | 0                              |
| Cancer (uterine)                                          | 1 (6)                   | 0                              |
| <b>Clinical course of treatment</b>                       |                         |                                |
| Oxygen required                                           | 16 (100)                | 3 (60) [ 2 got oxygen at home] |
| ICU admitted                                              | 3 (19)                  |                                |
| CCU admitted                                              | 1 (6)                   |                                |
| Dialysis required                                         | 1 (6)                   |                                |
| <b>Cause of death as stated from hospital as reported</b> |                         |                                |
| COVID-19 + Respiratory failure                            | 14 (88)                 |                                |
| Pneumonia                                                 | 1 (6)                   |                                |
| Chronic renal failure                                     | 1 (6)                   |                                |

STROBE Statement—Checklist of items that should be included in reports of *cross-sectional studies*

|                           | Item No | Recommendation                                                                                                                                                                                               | Page No |
|---------------------------|---------|--------------------------------------------------------------------------------------------------------------------------------------------------------------------------------------------------------------|---------|
| <b>Title and abstract</b> | 1       | (a) Indicate the study's design with a commonly used term in the title or the abstract                                                                                                                       | 1       |
|                           |         | (b) Provide in the abstract an informative and balanced summary of what was done and what was found                                                                                                          | 1       |
| <b>Introduction</b>       |         |                                                                                                                                                                                                              |         |
| Background/rationale      | 2       | Explain the scientific background and rationale for the investigation being reported                                                                                                                         | 4-5     |
| Objectives                | 3       | State specific objectives, including any prespecified hypotheses                                                                                                                                             | 5       |
| <b>Methods</b>            |         |                                                                                                                                                                                                              |         |
| Study design              | 4       | Present key elements of study design early in the paper                                                                                                                                                      | 6       |
| Setting                   | 5       | Describe the setting, locations, and relevant dates, including periods of recruitment, exposure, follow-up, and data collection                                                                              | 6-7     |
| Participants              | 6       | (a) Give the eligibility criteria, and the sources and methods of selection of participants                                                                                                                  | 6       |
| Variables                 | 7       | Clearly define all outcomes, exposures, predictors, potential confounders, and effect modifiers. Give diagnostic criteria, if applicable                                                                     | 8       |
| Data sources/measurement  | 8*      | For each variable of interest, give sources of data and details of methods of assessment (measurement). Describe comparability of assessment methods if there is more than one group                         | NA      |
| Bias                      | 9       | Describe any efforts to address potential sources of bias                                                                                                                                                    | NA      |
| Study size                | 10      | Explain how the study size was arrived at                                                                                                                                                                    | NA      |
| Quantitative variables    | 11      | Explain how quantitative variables were handled in the analyses. If applicable, describe which groupings were chosen and why                                                                                 | 7       |
| Statistical methods       | 12      | (a) Describe all statistical methods, including those used to control for confounding                                                                                                                        | 7       |
|                           |         | (b) Describe any methods used to examine subgroups and interactions                                                                                                                                          | 7       |
|                           |         | (c) Explain how missing data were addressed                                                                                                                                                                  | NA      |
|                           |         | (d) If applicable, describe analytical methods taking account of sampling strategy                                                                                                                           |         |
|                           |         | (e) Describe any sensitivity analyses                                                                                                                                                                        |         |
| <b>Results</b>            |         |                                                                                                                                                                                                              |         |
| Participants              | 13*     | (a) Report numbers of individuals at each stage of study—eg numbers potentially eligible, examined for eligibility, confirmed eligible, included in the study, completing follow-up, and analysed            | 8       |
|                           |         | (b) Give reasons for non-participation at each stage                                                                                                                                                         | NA      |
|                           |         | (c) Consider use of a flow diagram                                                                                                                                                                           | NA      |
| Descriptive data          | 14*     | (a) Give characteristics of study participants (eg demographic, clinical, social) and information on exposures and potential confounders                                                                     | 8-9     |
|                           |         | (b) Indicate number of participants with missing data for each variable of interest                                                                                                                          | NA      |
| Outcome data              | 15*     | Report numbers of outcome events or summary measures                                                                                                                                                         | 7-10    |
| Main results              | 16      | (a) Give unadjusted estimates and, if applicable, confounder-adjusted estimates and their precision (eg, 95% confidence interval). Make clear which confounders were adjusted for and why they were included | 10      |

|                          |    |                                                                                                                                                                            |       |
|--------------------------|----|----------------------------------------------------------------------------------------------------------------------------------------------------------------------------|-------|
|                          |    | (b) Report category boundaries when continuous variables were categorized                                                                                                  | NA    |
|                          |    | (c) If relevant, consider translating estimates of relative risk into absolute risk for a meaningful time period                                                           |       |
| Other analyses           | 17 | Report other analyses done—eg analyses of subgroups and interactions, and sensitivity analyses                                                                             | NA    |
| <b>Discussion</b>        |    |                                                                                                                                                                            |       |
| Key results              | 18 | Summarise key results with reference to study objectives                                                                                                                   | 10-15 |
| Limitations              | 19 | Discuss limitations of the study, taking into account sources of potential bias or imprecision. Discuss both direction and magnitude of any potential bias                 | 15    |
| Interpretation           | 20 | Give a cautious overall interpretation of results considering objectives, limitations, multiplicity of analyses, results from similar studies, and other relevant evidence | 16    |
| Generalisability         | 21 | Discuss the generalisability (external validity) of the study results                                                                                                      | 15    |
| <b>Other information</b> |    |                                                                                                                                                                            |       |
| Funding                  | 22 | Give the source of funding and the role of the funders for the present study and, if applicable, for the original study on which the present article is based              | 16    |

\*Give information separately for exposed and unexposed groups.

**Note:** An Explanation and Elaboration article discusses each checklist item and gives methodological background and published examples of transparent reporting. The STROBE checklist is best used in conjunction with this article (freely available on the Web sites of PLoS Medicine at <http://www.plosmedicine.org/>, Annals of Internal Medicine at <http://www.annals.org/>, and Epidemiology at <http://www.epidem.com/>). Information on the STROBE Initiative is available at [www.strobe-statement.org](http://www.strobe-statement.org).

# BMJ Open

## Establishing a sentinel surveillance system for the novel coronavirus disease 2019 (COVID-19) in a resource limited county: methods, system attributes and early findings

|                                 |                                                                                                                                                                                                                                                                                                                                                                                                                                                                                                                                                                                                                                                                                                                                                                                                                                                                                                                                                                                                                                                                                                                                                                                        |
|---------------------------------|----------------------------------------------------------------------------------------------------------------------------------------------------------------------------------------------------------------------------------------------------------------------------------------------------------------------------------------------------------------------------------------------------------------------------------------------------------------------------------------------------------------------------------------------------------------------------------------------------------------------------------------------------------------------------------------------------------------------------------------------------------------------------------------------------------------------------------------------------------------------------------------------------------------------------------------------------------------------------------------------------------------------------------------------------------------------------------------------------------------------------------------------------------------------------------------|
| Journal:                        | <i>BMJ Open</i>                                                                                                                                                                                                                                                                                                                                                                                                                                                                                                                                                                                                                                                                                                                                                                                                                                                                                                                                                                                                                                                                                                                                                                        |
| Manuscript ID                   | bmjopen-2021-055169.R2                                                                                                                                                                                                                                                                                                                                                                                                                                                                                                                                                                                                                                                                                                                                                                                                                                                                                                                                                                                                                                                                                                                                                                 |
| Article Type:                   | Original research                                                                                                                                                                                                                                                                                                                                                                                                                                                                                                                                                                                                                                                                                                                                                                                                                                                                                                                                                                                                                                                                                                                                                                      |
| Date Submitted by the Author:   | 03-Nov-2021                                                                                                                                                                                                                                                                                                                                                                                                                                                                                                                                                                                                                                                                                                                                                                                                                                                                                                                                                                                                                                                                                                                                                                            |
| Complete List of Authors:       | Das, Pritimoy; International Centre for Diarrhoeal Disease Research Bangladesh<br>Akhtar, Zubair; International Centre for Diarrhoeal Disease Research Bangladesh<br>Mah-E-Muneer, Syeda ; International Centre for Diarrhoeal Disease Research Bangladesh<br>Islam, Md.; International Centre for Diarrhoeal Disease Research Bangladesh<br>Rahman, Mohammed; International Centre for Diarrhoeal Disease Research Bangladesh<br>Rahman, Mustafizur; International Centre for Diarrhoeal Disease Research Bangladesh<br>Rahman, Mahmudur; International Centre for Diarrhoeal Disease Research Bangladesh<br>Rahman , Mahbubur ; Institute of Epidemiology Disease Control and Research<br>Billah, Mallick; Institute of Epidemiology Disease Control and Research<br>Alamgir, A. S. M; Institute of Epidemiology Disease Control and Research<br>Flora, Meerjady Sabrina ; Institute of Epidemiology Disease Control and Research<br>Shirin, Tahmina; Institute of Epidemiology Disease Control and Research<br>Banu, Sayera; International Centre for Diarrhoeal Disease Research Bangladesh<br>Chowdhury, Fahmida; International Centre for Diarrhoeal Disease Research Bangladesh |
| <b>Primary Subject Heading</b>: | Public health                                                                                                                                                                                                                                                                                                                                                                                                                                                                                                                                                                                                                                                                                                                                                                                                                                                                                                                                                                                                                                                                                                                                                                          |
| Secondary Subject Heading:      | Epidemiology, Global health, Infectious diseases                                                                                                                                                                                                                                                                                                                                                                                                                                                                                                                                                                                                                                                                                                                                                                                                                                                                                                                                                                                                                                                                                                                                       |
| Keywords:                       | COVID-19, Epidemiology < TROPICAL MEDICINE, Public health < INFECTIOUS DISEASES, Diagnostic microbiology < INFECTIOUS DISEASES, EPIDEMIOLOGY                                                                                                                                                                                                                                                                                                                                                                                                                                                                                                                                                                                                                                                                                                                                                                                                                                                                                                                                                                                                                                           |
|                                 |                                                                                                                                                                                                                                                                                                                                                                                                                                                                                                                                                                                                                                                                                                                                                                                                                                                                                                                                                                                                                                                                                                                                                                                        |

1  
2  
3  
4  
5  
6  
7  
8  
9  
10  
11  
12  
13  
14  
15  
16  
17  
18  
19  
20  
21  
22  
23  
24  
25  
26  
27  
28  
29  
30  
31  
32  
33  
34  
35  
36  
37  
38  
39  
40  
41  
42  
43  
44  
45  
46  
47  
48  
49  
50  
51  
52  
53  
54  
55  
56  
57  
58  
59  
60





I, the Submitting Author has the right to grant and does grant on behalf of all authors of the Work (as defined in the below author licence), an exclusive licence and/or a non-exclusive licence for contributions from authors who are: i) UK Crown employees; ii) where BMJ has agreed a CC-BY licence shall apply, and/or iii) in accordance with the terms applicable for US Federal Government officers or employees acting as part of their official duties; on a worldwide, perpetual, irrevocable, royalty-free basis to BMJ Publishing Group Ltd ("BMJ") its licensees and where the relevant Journal is co-owned by BMJ to the co-owners of the Journal, to publish the Work in this journal and any other BMJ products and to exploit all rights, as set out in our [licence](#).

The Submitting Author accepts and understands that any supply made under these terms is made by BMJ to the Submitting Author unless you are acting as an employee on behalf of your employer or a postgraduate student of an affiliated institution which is paying any applicable article publishing charge ("APC") for Open Access articles. Where the Submitting Author wishes to make the Work available on an Open Access basis (and intends to pay the relevant APC), the terms of reuse of such Open Access shall be governed by a Creative Commons licence – details of these licences and which [Creative Commons](#) licence will apply to this Work are set out in our licence referred to above.

Other than as permitted in any relevant BMJ Author's Self Archiving Policies, I confirm this Work has not been accepted for publication elsewhere, is not being considered for publication elsewhere and does not duplicate material already published. I confirm all authors consent to publication of this Work and authorise the granting of this licence.

# Establishing a sentinel surveillance system for the novel coronavirus disease 2019 (COVID-19) in a resource limited county: methods, system attributes and early findings

Pritimoy Das<sup>1</sup>†, Zubair Akhtar<sup>1</sup>, Syeda Mah-E-Muneer<sup>1</sup>, Md Ariful Islam<sup>1</sup>, Mohammed Ziaur Rahman<sup>1</sup>, Mustafizur Rahman<sup>1</sup>, Mahmudur Rahman<sup>1</sup>, Mahbubur Rahman<sup>2</sup>, Mallick Masum Billah<sup>2</sup>, ASM Alamgir<sup>2</sup>, Meerjady Sabrina Flora<sup>2</sup>, Tahmina Shirin<sup>2</sup>, Sayera Banu<sup>1</sup>, Fahmida Chowdhury<sup>1</sup>

<sup>1</sup>Infectious Diseases Division, International Centre for Diarrhoeal Disease Research, Bangladesh (icddr,b), Dhaka, Bangladesh

<sup>2</sup>Institute of Epidemiology, Disease Control and Research (IEDCR), Dhaka, Bangladesh

†Correspondence to Pritimoy Das; [pritimoydas@gmail.com](mailto:pritimoydas@gmail.com)

## ABSTRACT

**Objectives** To establish a hospital-based platform to explore the epidemiological and clinical characteristics of patients screened for COVID-19.

**Design** Hospital-based surveillance.

**Setting** This study was conducted in four selected hospitals in Bangladesh during 10th June to 31st August 2020.

**Participants** In total, two thousand three hundred and forty-five patients of all age (68% male) attending the outpatient and inpatient departments of surveillance hospitals with any one or more of the following symptoms within last 7 days- fever, cough, sore throat, and respiratory distress.

**Outcome measures** The outcome measures were COVID-19 positivity and mortality rate among enrolled patients. Pearson's  $\chi^2$  test was used to compare the categorical variables (sign-symptoms, co-morbidities, admission status and COVID-19 test results). Regression analysis was performed to determine the association between potential risk factors and death.

**Results** COVID-19 was detected among 922 (39%) enrolled patients. It was more common in outpatients with a peak positivity in 2nd week of July (112, 54%). The median age of the

1  
2  
3 confirmed COVID-19 cases was 38 years (IQR: 30-50), 654 (71%) were male, and 83 (9%)  
4 were healthcare workers. Cough (615, 67%) was the most common symptom, followed by  
5 fever (493, 53%). Diabetic patients were more likely to get COVID-19 than non-diabetic  
6 (48% vs. 38%; OR:1.5; 95% CI:1.2-1.9). The death rate among COVID-19 positive was  
7 2.3%, n=21. Death was associated with age  $\geq$  60 years (AOR:13.9; 95% CI:5.5-34), shortness  
8 of breath (AOR:9.7; 95% CI: 3.0-30), co-morbidity (AOR:4.8; 95% CI:1.1-21.7), smoking  
9 history (AOR: 2.2, 95% CI:0.7-7.1), attending the hospital in  $<$ 2 days of symptom onset due  
10 to critical illness (AOR: 4.7; 95% CI:1.2-17.8) and hospital admission (AOR:3.4; 95% CI:  
11 1.2-9.8).  
12  
13  
14  
15  
16  
17  
18

19 **Conclusions** COVID-19 positivity was observed in more than one-third of suspected  
20 COVID-19 patients attending selected hospitals. While managing such patients, the risk  
21 factors identified for higher death rates should be considered.  
22  
23  
24

25 **Key words:** Bangladesh, COVID-19, hospital-based study, SARS-CoV-2, sentinel  
26 surveillance.  
27  
28  
29  
30  
31  
32  
33  
34  
35  
36  
37  
38  
39  
40  
41  
42  
43  
44  
45  
46  
47  
48  
49  
50  
51  
52  
53  
54  
55  
56  
57  
58  
59  
60



## Strengths and limitations of this study

- The sentinel surveillance for COVID-19 was implemented in collaboration with a government public health institution and an international research organization in resource-constrained settings.
- This was a multicentre study with representative hospitals included from almost all major administrative regions of Bangladesh.
- Our surveillance method was unique as we shared test results with patients at earliest and considered follow-up at 30-day after enrollment to track the prognosis of COVID-19 positive patients even after they were discharged from the enrolling hospital.
- As we did not test any asymptomatic patients and community burden estimation was beyond our scope, the true prevalence of COVID-19 patients might be higher than reported in our study.

ew only

## Introduction

Starting from its inception at Wuhan, Hubei Province, China, the novel coronavirus named severe acute respiratory syndrome coronavirus-2 (SARS-CoV-2) has spread across the world within a few months, causing Coronavirus Disease 2019 (COVID-19).<sup>1</sup> Globally, 129,651,305 cases and 2.8 million deaths were recorded till 31<sup>th</sup> March 2021.<sup>2</sup> This virus manifests various clinical characteristics, from asymptomatic infection to severe pneumonia, vasculitis, and death.<sup>3-6</sup> It was declared a public health emergency of international concern (PHEIC) by the world health organization (WHO) in 30<sup>th</sup> January 2020 and subsequently a pandemic on 11<sup>th</sup> March 2020.<sup>7</sup> During that early stage of this coronavirus disease, there was uncertainty and variation regarding the epidemiological, clinical, and virological characteristics of this novel infectious disease. Though COVID-19 cases were reported from 198 countries or regions, and over 400,000 people were confirmed to be infected globally (24<sup>th</sup> March 2020),<sup>8</sup> its transmission dynamics within the human population was unclear, so WHO designed a protocol for the countries to investigate the COVID-19 outbreaks locally and emphasized COVID-19 surveillance to understand the country situation.<sup>9</sup>

Bangladesh, a country in Southeast Asia, exhibited different epidemiological features compared to other countries regarding the influenza virus in terms of seasonality, severity, and mortality.<sup>10,11</sup> On 8<sup>th</sup> March 2020, the first three cases of confirmed COVID-19 were reported in Bangladesh,<sup>12</sup> and subsequently, the number of confirmed cases and deaths increased: at the end of the first month, there were 51 confirmed cases with five deaths from COVID-19.<sup>13</sup> As COVID-19 was a novel virus, there was minimal information regarding its severity and magnitude in Bangladesh.

The government of Bangladesh (GoB) initiated several efforts for the early detection of the virus to mitigate the spread such as screening of passengers at airports, land ports, and maritime ports; hotline system to notify any suspected case of COVID-19 to the Institute of

1  
2  
3 Epidemiology, Disease Control and Research (IEDCR) so that their specimens could be  
4 collected and tested. Moreover, passengers arriving from countries with COVID-19 outbreaks  
5 were screened at the point of entries (PoE) and monitored for any symptom onset for 14 days,  
6 considering the virus's incubation period recommended by the WHO.<sup>14</sup> However, these  
7 efforts were not enough to detect COVID-19 patients, as asymptomatic COVID-19 carriers  
8 already unfolded in their community and spread the virus in different geographical locations  
9 across Bangladesh.<sup>15</sup> Patients with COVID-19 symptoms were reported from different  
10 hospitals and needed to be tested for diagnosis and appropriate treatment purposes.<sup>16</sup> Initially,  
11 there were 10 laboratories in capital Dhaka city and five laboratories outside Dhaka had  
12 COVID-19 testing facility in Bangladesh.<sup>17</sup> Thus, as a part of the pandemic preparedness and  
13 responses, there was an immediate need to establish a hospital-based platform to screen  
14 suspected COVID-19 patients to support GoB in hospitals where PCR-based COVID-19  
15 testing facility was not available. The GoB initiated a countrywide system for detecting  
16 COVID-19 cases by prioritizing divisional hospitals, medical college hospitals, and few  
17 specialized hospitals to screen and test for COVID-19. Moreover, there was a knowledge gap  
18 on clinical and epidemiological data of COVID-19 patients in Bangladesh during the first  
19 wave of the pandemic from any sentinel sites involving multiple public and private hospitals  
20 across the country.

21  
22  
23  
24  
25  
26  
27  
28  
29  
30  
31  
32  
33  
34  
35  
36  
37  
38  
39  
40  
41  
42  
43  
44  
45  
46  
47  
48  
49  
50  
51  
52  
53  
54  
55  
56  
57  
58  
59  
60  
The quality of surveillance data in many developing countries is hampered by a variety of  
factors, including a lack of resources and training.<sup>18</sup> Ibrahim et al. (2020) looked into various  
COVID-19 surveillance activities around the world and categorized them into a systematic  
review paper of thirty articles.<sup>19</sup> Our surveillance falls into a combination of sentinel  
surveillance and enhanced surveillance of hospitalized cases in which risk groups can be  
identified, tested, and followed up on via a hospital and laboratory network. Current  
surveillance included searching for suspected COVID-19 patients among hospitalized

1  
2  
3 patients as well as screening and testing patients from outpatient. In Singapore, a similar  
4  
5 approach was taken for the investigation and confinement efforts for COVID-19.<sup>20,21</sup>  
6  
7

8  
9 To support the containment efforts for COVID-19, the International Centre for Diarrhoeal  
10  
11 Disease Research, Bangladesh (icddr,b) and the Institute of Epidemiology, Disease Control  
12  
13 and Research (IEDCR) under the Bangladesh Ministry of Health and Family Welfare jointly  
14  
15 conducted this surveillance in selected hospitals where there was no nearby PCR based  
16  
17 COVID-19 testing facility. The aim of this study was to establish a hospital-based platform to  
18  
19 describe and analyze epidemiological and clinical characteristics of patients screened for  
20  
21 COVID-19 in selected Bangladeshi hospitals with limited resources during the first wave of  
22  
23 COVID-19 pandemic of the pandemic.  
24  
25  
26  
27  
28  
29

## 30 **Methods**

### 31 ***Setting***

32  
33 The surveillance was conducted at the outpatient department (OPD) and inpatient department  
34  
35 (IPD) of four selected hospitals where patients sought healthcare with suspected COVID-19  
36  
37 symptoms. There were three public hospitals and one private hospital, all of which were in  
38  
39 different geographical locations across Bangladesh (**Figure 1**). The public hospitals namely  
40  
41 Sadar Hospital, Hobiganj (24°22'24.77", 91°25'3.62"), General Hospital, Potuakhali  
42  
43 (22°21'52.19", 90°19'37.25" and District Hospital, Narshingdi (23°55' 48.6", 90°42' 9.84"),  
44  
45 all having 100-250 number of beds. Jahurul Islam Medical College hospital, Kishoregonj  
46  
47 (24°12' 2.26", 90°55'1.81") is a general tertiary level 500 bed teaching hospital. To select  
48  
49 these hospitals, we evaluated the ongoing national hospital-based Influenza surveillance  
50  
51 platforms to identify the hospitals where there was no in-hospital or nearby polymerase chain  
52  
53 reaction (PCR) based COVID-19 testing facility at that time but a high load of potential  
54  
55 suspected COVID-19 patients in that geographical location. It was considered that additional  
56  
57  
58  
59  
60

1  
2  
3 support to these hospitals would strengthen COVID-19 case identification and reporting at  
4  
5 the national level with generation of epidemiological data.  
6  
7

### 8 ***Patient enrolment***

9  
10  
11 Within three months of the first COVID-19 case detection in the country, we deployed two  
12  
13 trained field staff in each selected hospital (total eight field staff placed in four hospitals) for  
14  
15 screening suspected COVID-19 patients among all the patients attending the fever clinic at  
16  
17 OPD and among all inpatients admitted into the specific wards (medicine ward, pediatric  
18  
19 ward, intensive care unit (ICU) and COVID-19 isolation ward). These field staffs worked  
20  
21 with hospital physicians to enroll suspected COVID-19 patients.  
22  
23  
24  
25

26  
27 Case-definition: Field staff actively screened for suspected COVID-19 patients using the  
28  
29 following case definition: patient with any one or more of the following symptoms within last  
30  
31 7 days- fever, cough, sore throat, and respiratory distress. This case definition was applied by  
32  
33 GoB to collect samples as suspected COVID-19 patient.  
34  
35

### 36 ***Data collection***

37  
38  
39 After obtaining written informed consent from patients who met the suspected COVID-19  
40  
41 case definition, field staff collected data on socio-demographics (age, sex, occupation,  
42  
43 educational level), travel history (local or international travel), and clinical characteristics  
44  
45 (presenting symptoms, clinical signs, comorbidity, admission status, smoking history,  
46  
47 duration of symptom onset to treatment seeking) from them. Field staff used proper personal  
48  
49 protective equipment (PPE) such as N95 mask/medical mask, disposable gown, disposable  
50  
51 cap, disposable gloves, face shield and goggles during data and specimen collection. Field  
52  
53 staff used tablet computers to collect data syncing with local icddr,b server using mobile  
54  
55 internet. This system allowed real-time monitoring of the situation across all hospitals by the  
56  
57  
58  
59  
60

1  
2  
3 research team centrally from Dhaka city. After 30 days of enrollment, the surveillance team  
4 (field staff, their supervisor and occasionally, the first author) followed up with each enrolled  
5 patient through mobile phone calls to register the outcome of their illnesses and updated the  
6 database accordingly. The outcome variables were COVID-19 positivity by RT-PCR test and  
7 the mortality among the SARS-CoV-2 infected patients.  
8  
9

### 15 ***Specimen collection and Transportation***

16  
17 Trained field staff collected a single nasopharyngeal swab through swab stick from each  
18 enrolled patients in viral transportation medium (VTM) and stored in a cool box between 2-4  
19 °C temperature. Inhouse (icddr,b lab) VTM preparation was used for the collected samples.  
20  
21 Every afternoon, a dedicated porter transported all the samples to icddr,b, Dhaka using a  
22 private car from three surveillance hospitals except Patuakhali. From Patuakhali, one of the  
23 dedicated porter brought samples to icddr,b by launch (public transport). All VTMs were  
24 handed over to icddr,b virology laboratory within 24 hours of specimen collection.  
25  
26  
27  
28  
29  
30  
31  
32  
33

### 34 ***Laboratory testing***

35  
36 Nasopharyngeal swabs were tested for SARS-CoV-2 at the Virology Laboratory of icddr,b.  
37  
38 Ribonucleic acid (RNA) was extracted from nasopharyngeal swab using QiaAmp Viral RNA  
39 Mini kit (Qiagen, Hilden, Germany). RNA was tested for severe acute respiratory syndrome  
40 coronavirus 2 (SARS-CoV-2) by real-time reverse transcription polymerase chain reaction  
41 (rRT-PCR) targeting SARS-CoV-2 specific ORF1ab- and N-gene. Any person with an rRT-  
42 PCR positive test result was defined as a laboratory-confirmed COVID-19 case/patient.  
43  
44  
45  
46  
47  
48  
49  
50

### 51 ***Reporting to IEDCR, surveillance hospitals, and patients***

52  
53 We received the laboratory test results on the following day of specimen collection. Our  
54 research team then shared the results with respective hospital authorities, district civil  
55 surgeons, divisional health directors, and the director of IEDCR over email. Moreover, we  
56  
57  
58  
59  
60

1  
2  
3 sent a text message (Short Message Service- SMS) to each enrolled patient informing their  
4  
5 test report within 36 hours of specimen collection. Our investigators also responded to every  
6  
7 query when any COVID-19 positive patient called them over the telephone upon getting the  
8  
9 test result. The respective health care facilities then managed the patients following the  
10  
11 existing government system.  
12  
13

### 14 15 ***Data analysis***

16  
17 The data management and analysis were performed using the software Stata v.13 (Stata Corp  
18  
19 LP, College Station, TX, USA). We summarized all categorical variables using frequency  
20  
21 and percentage. We also summarized using mean and standard deviation (SD) for  
22  
23 symmetrically distributed variables and median and interquartile range (IQR) for  
24  
25 asymmetrically distributed variables. We performed Pearson's  $\chi^2$  test to compare the  
26  
27 categorical variables and considered  $p < 0.05$  as statistically significant. We used univariate  
28  
29 logistic regression analysis for strengths of associations and identified risk factors for death,  
30  
31 using odds ratio and adjusted for age and sex in the multivariable model.  
32  
33  
34  
35  
36

### 37 38 ***Ethical consideration***

39  
40 The protocol was reviewed and approved by the institutional review boards (IRB; Research  
41  
42 Review Committee and Ethical Review Committee) of the International Centre for  
43  
44 Diarrhoeal Disease Research, Bangladesh (Ref. number PR-20032). We obtained written,  
45  
46 informed consent of the participants before enrollment. To ensure anonymity of the study  
47  
48 participants and maintain the confidentiality, the names and identifying information of the  
49  
50 participants was and will not be shared with anyone outside of the data collection team and this  
51  
52 information was kept in locked cabinets and/or computers with passwords. Laboratory  
53  
54 specimens were identified only by patient enrolment ID. Necessary permission was obtained  
55  
56 from the respective hospitals before establishing the hospital-based platform and data  
57  
58 collection.  
59  
60

### *Patient and public involvement*

Patients or the public were not involved in the study design, or conduct, or reporting, or dissemination plans.

## **Results**

### *COVID-19 positivity and Demographic characteristics*

During 10<sup>th</sup> June to 31<sup>st</sup> August 2020, we enrolled 2,345 suspected COVID-19 patients from four selected hospitals. Virology Laboratory of icddr,b tested all the 2,345 nasopharyngeal swab samples collected from these enrolled participants; of them, 922 (39.3%) were laboratory-confirmed COVID-19 patients. The median age of the confirmed COVID-19 patients was 38 years (Interquartile range, IQR: 30-50 years), and 654 (71%) were male. COVID-19 was mostly detected among patients aged between 21-40 years (474, 51.3%). About half of the COVID-19 positive patients (467, 50.7%) had a higher level of education (>12 years). We identified 302 (13%) of the patients meeting surveillance case definition were healthcare workers (HCW), and they constituted 83 (9%) of all confirmed COVID-19 patients (**Table 1**).

### *Seasonality and geographical variation*

Over the three months of the surveillance period, the peak of the COVID-19 positivity among suspected COVID-19 patients was detected in the 24<sup>th</sup> and 25<sup>th</sup> epi weeks (2<sup>nd</sup> and 3<sup>rd</sup> week of July 2020). We observed a relatively hard-to-reach riverside area (Patuakhali hospital) reporting the highest number and proportion of cases (355/793; 45%) compared to other hospitals in Narshingdi (313/796; 39%), Kishoreganj (144/462; 31%), and Habiganj (110/294; 37%). The proportion of test positivity over time dropped and gradually started declining from the epi week 28<sup>th</sup> (2<sup>nd</sup> week of August) (**Figure 1 and Figure 2 A, B**).



1  
2  
3 *Differences in clinical presentation between COVID-19 positive and COVID-19 negative*  
4  
5 *patients*  
6  
7

8 The presenting clinical features in all suspected COVID-19 patients varied from dry cough  
9 (most common, 67%, n=1562) to rash (least common, 0.4%, n=9), (**Figure 3A**). We found  
10 fever  $\geq 38^{\circ}$  C (1252, 53% vs. 1077, 44%), loss of taste (964, 41% vs. 711, 30%), headache  
11 (772, 33% vs. 645, 27%), fatigue (696, 30% vs. 499, 21%), loss of smell (528, 23% vs. 295,  
12 13%), nausea/vomiting (431, 18% vs. 340, 15%) and joint pain (314, 13% vs. 223, 9%) were  
13 more likely to be the presenting clinical features among COVID-19 positive patients  
14 compared to the negative patients (all  $p < 0.05$ ). On the other hand, though sore throat was a  
15 very common feature among suspected COVID-19 patients, it was less common in the  
16 COVID-19 positive patients than COVID-19 negative patients (900, 38% vs. 1060, 45%,  
17  $p = 0.002$ ) (**Figure 3A**).  
18  
19  
20  
21  
22  
23  
24  
25  
26  
27  
28  
29  
30  
31

32 *IPD vs. OPD visits*  
33  
34

35 Most of the patients meeting the suspected COVID-19 case definition (2141, 91%) were  
36 identified from the outpatient departments of all the surveillance hospitals, and of them, 865  
37 (40%) were COVID-19 positive. In contrast, among all patients enrolled from the inpatient  
38 departments, 57 (28%) were found COVID-19 positive. Shortness of breath (97, 47% vs. 482,  
39 22%) and vomiting (58, 29% vs. 146, 7%) were more common clinical characteristics of  
40 COVID-19 positive patients admitted in the hospitals compared to COVID-19 patients who  
41 attended at outpatients (**Figure 3B**). However, fever (1163, 54% vs. 82, 40%), sore throat  
42 (869, 41% vs. 18, 9%), runny nose (518, 24% vs. 14, 7%), loss of smell (503, 24% vs. 18,  
43 9%) and joint pain (304, 14% vs. 3, 2%) were more common clinical symptoms in COVID-  
44 19 patients at OPD compared to COVID-19 patients at IPD (All  $p$  values  $< 0.05$ ).  
45  
46  
47  
48  
49  
50  
51  
52  
53  
54  
55  
56  
57  
58  
59  
60

*Comorbidities among COVID-19 patients*

1  
2  
3 Compared to COVID-19 negative patients, patients with co-morbidities reported more  
4 infection with SARS-CoV-2, such as for chronic liver disease (20, 51% vs. 898, 39%),  
5  
6 cardiovascular disease (116, 43% vs. 801, 39%), and diabetes (164, 48% vs. 755, 38%). Of  
7  
8 these co-morbidities, diabetic patients showed significantly high susceptibility ( $p < 0.05$ ) of  
9  
10 getting infected with SARS-CoV-2 than non-diabetic patients (**Figure 3C**). Other than these  
11  
12 co-morbidities, we also found 19 cancer patients meeting enrolment criteria; of them, four  
13  
14 patients (21%) were COVID-19 positive; and among positive, one (25%) died.  
15  
16  
17  
18  
19

### 20 *Mortality and associated risk factors*

21  
22  
23 Among the 922 laboratory-confirmed COVID-19 patients, 21 (2.3%) patients were reported  
24  
25 dead from our routine follow-up after a month of enrolment. Of them, 76% (16/21) patients  
26  
27 died at the same enrolment hospital or different hospitals, 24% (5/21) patients died at home  
28  
29 or on the way to the hospital. From the onset of symptoms, 43% (9/21) of patients died within  
30  
31 7 days, and 95% (20/21) deaths occurred within 15 days (**Supplementary Table 1**). When  
32  
33 we compared epidemiological factors for association with adverse outcome of their clinical  
34  
35 progression, our data showed that death was more likely to occur among patients presenting  
36  
37 with age  $\geq 60$  years (AOR:13.9; 95% CI: 5.5-34.5), shortness of breath (AOR:9.7; 95% CI:  
38  
39 3.0-30), co-morbidity (AOR:4.8; 95% CI: 1.1-21.7), smoking history (AOR:2.2, 95% CI: 0.7-  
40  
41 7.1), attending to a hospital in  $<2$  days from the onset of symptoms due to critical illness  
42  
43 (AOR: 4.7; 95% CI: 1.2-17.8) and hospital admission (AOR:3.4; 95% CI: 1.2-9.8; **Table 2**).  
44  
45  
46  
47  
48

### 49 **Discussion**

50  
51 Our hospital-based COVID-19 sentinel surveillance platform identified more than one-third  
52  
53 (39%) of patients as laboratory-confirmed COVID-19 among the suspected COVID-19  
54  
55 patients attending the hospitals during the study period. This COVID-19 positivity rate was  
56  
57 much higher to draw public health attention compared to WHO reported national data  
58  
59  
60

1  
2  
3 (19.5%) from 8<sup>th</sup> March to 14<sup>th</sup> September 2020.<sup>22</sup> The national health system intended to  
4 collect specimens from symptomatic individuals, but considering resource constrain  
5 verification of symptoms was difficult and thereby some asymptomatic individuals could be  
6 included for testing. Moreover, people seeking a routine COVID-19 PCR test as a  
7 requirement for international travel was also included in the national system for COVID-19  
8 reporting. In contrast, surveillance staff and physicians strictly verified the symptoms  
9 reported by each patient before enrolment and sample collection through the sentinel  
10 surveillance platform. This sentinel surveillance was strictly supervised and monitored by a  
11 team of dedicated researchers for the utmost quality of specimen and data collection from  
12 actual symptomatic patients and rapid transportation of specimens from remote field sites to  
13 central laboratory at Dhaka maintaining recommended standard temperature for rRT-PCR  
14 testing. Thereby, a robust sentinel COVID-19 surveillance is so important to better  
15 understand the actual disease burden in different administrative regions of a country.

16  
17  
18  
19  
20  
21  
22  
23  
24  
25  
26  
27  
28  
29  
30  
31  
32  
33  
34 More than half of our COVID-19 positive patients were young adults within the age group of  
35 21-40 years. This was consistent (46.7%) with the WHO report for Bangladesh on morbidity  
36 and mortality weekly update (MMWU) as of 14th Sept 2020.<sup>22</sup> Among the COVID-19  
37 positive patients, male was predominant. This was consistent with other nearby countries  
38 such as India, where researcher reported that male COVID-19 cases (65.39%) were more  
39 than females (34.61%).<sup>23</sup> This might be due to the male-dominant societies' unique health-  
40 seeking behavior like Bangladesh, where women do not seek healthcare unless severe.<sup>24</sup> This  
41 finding was similar (68% male) during March-April, the early phase of novel coronavirus  
42 detection in Bangladesh.<sup>25</sup> Other than male predominance, more than half of the COVID-19  
43 positive patients were found to be educated for 12 years or more. This might not be the cause  
44 that educated people were more infected than less educated or uneducated; rather it may be  
45  
46  
47  
48  
49  
50  
51  
52  
53  
54  
55  
56  
57  
58  
59  
60

1  
2  
3 people with higher education were more conscious and thus were coming to hospitals for  
4  
5 testing.  
6  
7

8  
9 Among COVID-19 suspected healthcare workers from our surveillance hospitals, one out of  
10  
11 four was SARS-CoV-2 infected (27%). Chartterjee et. al reported that 5% of symptomatic  
12  
13 HCWs were SARS-COV-2 positive in India.<sup>26</sup> This was not a surprise as healthcare workers  
14  
15 remain vulnerable to infectious disease in any low- and middle-income countries (LMICs)  
16  
17 such as Bangladesh and demand adequate preparedness to fight against COVID-19.<sup>27</sup> Our  
18  
19 findings also support that HCWs were getting infected at a much higher rate than India and,  
20  
21 even more than that of a COVID-19 dedicated tertiary care hospital in Dhaka (11%),<sup>28</sup>  
22  
23 Bangladesh. Thereby, appropriate measures should be taken to prevent primary infection  
24  
25 from patients and secondary infection from colleagues. Appropriate measures such as  
26  
27 Infection Prevention and Control training, adequate PPE supply, and their proper use should  
28  
29 be taken into consideration with high priority to protect HCWs from getting infected from  
30  
31 their workplace.  
32  
33  
34  
35  
36

37 The positivity rate helps public health officials to assess the disease burden at different time  
38  
39 point. COVID-19 positivity rate among the tested patients was increasing till July, followed  
40  
41 by a gradual decline, similar to the country trend as reported by the Director General of  
42  
43 Health Services (DGHS) Bangladesh and World Health Organization report.<sup>29,30</sup> There was a  
44  
45 sharp drop in specimen collection in the first week of August due to “Eid holidays” the  
46  
47 biggest religious festival for Muslims.  
48  
49  
50

51 During the initial days of the COVID-19 crisis, there was a deficiency of adequate data to  
52  
53 make appropriate policy decisions for Bangladesh.<sup>31</sup> Providing timely test reports and feeding  
54  
55 peripheral sites’ data from our surveillance hospitals to the government recording system  
56  
57 greatly enhanced the management of the novel coronavirus crisis. Moreover, our work  
58  
59  
60

1  
2  
3 generated some key information about the ongoing COVID-19 pandemic in Bangladesh.  
4  
5 COVID-19 suspected patients were found more at OPD than inpatient department, indicating  
6  
7 that patients with COVID-19 symptoms were primarily mild, thereby seeking treatment from  
8  
9 the OPD. Clinical features widely vary from asymptomatic infection (40% to 45% of SARS-  
10  
11 CoV-2 infections) to death from acute respiratory distress syndrome (ARDS).<sup>5,6,32</sup> Chinese  
12  
13 researchers reported fever, cough, and expectoration were the commonest symptoms<sup>33</sup> in a  
14  
15 multi-centered study. Another meta-analysis<sup>34</sup> revealed fever (88.7%), cough (57.6%), and  
16  
17 dyspnea (45.6%) were the prominent presentation. We found cough followed by fever as the  
18  
19 top two presenting symptoms of COVID-19 patients. Additionally, sore throat, loss of taste  
20  
21 and loss of smell, headache, muscle& joint pain were more likely to occur among laboratory-  
22  
23 confirmed COVID-19 patients. Nothing conclusive, but these differences could be used  
24  
25 carefully by the treating physicians to manage a suspected COVID-19 patient initially before  
26  
27 getting the lab report.  
28  
29  
30  
31  
32

33  
34 Comorbidities play a crucial role towards disease progression. Diabetes was the most  
35  
36 commonly reported factor towards the adverse outcome of COVID-19 patients and their  
37  
38 disease progression,<sup>35</sup> requiring more hospitalization in the ICU and associated with more  
39  
40 death compared to non-diabetic COVID-19 patients.<sup>36</sup> Our surveillance data showed that  
41  
42 diabetic patients were more susceptible to get a COVID-19 infection than others. So, besides  
43  
44 other co-morbidities such as cardiovascular diseases, clinicians should consider additional  
45  
46 clinical measures to manage a COVID-19 positive diabetic patient.  
47  
48  
49

50  
51 Mortality rate is one of the key indicators in public health. Our surveillance data revealed  
52  
53 that the percentage of death among our COVID-19 positive patients was a little higher  
54  
55 (2.3%), than the global average death rate (2.2%) as of 22<sup>nd</sup> March 2021.<sup>2</sup> This death rate  
56  
57 was possible to capture due to the unique post-discharge telephone follow up of enrolled  
58  
59 patients after 30 days of enrollment for their outcome. Among all COVID-19 positive  
60

1  
2  
3 patients identified through the surveillance, we detected only 28% death from the  
4  
5 surveillance hospitals, the remaining 72% deaths were possible to capture from this unique  
6  
7 follow-up strategy of our sentinel surveillance system.  
8  
9

10  
11 We observed, elderly, co-morbidity, having breathing difficulty, smoking, and  
12  
13 admission in the inpatient department due to more severe illness were more likely to be the  
14  
15 risk factors for death among the SARS-CoV-2 infected patients. Regarding gender, Italy  
16  
17 reported more death among men than women.<sup>37</sup> Nationally, Bangladesh has more COVID-19  
18  
19 deaths among men (76%) than women (24%),<sup>38</sup> but we did not find any significant difference  
20  
21 in death rate between males and females from our surveillance. A nationwide analysis in  
22  
23 China showed that age between 65 and 74 years, coronary heart disease, cerebrovascular  
24  
25 disease, dyspnea were independent risk factors associated with fatal outcome.<sup>39</sup> China CDC  
26  
27 analyzed 44,000 COVID patients' data and reported elderly, diabetes, cardiovascular disease,  
28  
29 hypertension and chronic respiratory disease were all associated with an increased risk of  
30  
31 death.<sup>40</sup> In the United Kingdom, people aged over 70 years with cardiovascular and  
32  
33 respiratory diseases were considered as high-risk group.<sup>41</sup> Smoking was associated with  
34  
35 increased risks of COVID-19 death and disease progression, a finding similar to other  
36  
37 studies.<sup>42-45</sup> The WHO also mentioned increased severity of disease and mortality in  
38  
39 hospitalized COVID-19 patients among smokers.<sup>46</sup> One meta-analysis reported a pooled OR  
40  
41 of 1.89 (95% CI: 1.10-3.24) on the severity of this disease among smokers than non-  
42  
43 smokers.<sup>44</sup> Another systematic review reported a significant association between smoking  
44  
45 and the progression of COVID-19 (OR: 1.91; 95% CI: 1.42-2.59); the authors commented  
46  
47 that the actual risk of smoking might be higher.<sup>47</sup> Thereby, for a better outcome from  
48  
49 COVID-19 infection during this pandemic smoking should be avoided. The surveillance data  
50  
51 also showed more deaths occurred among critically ill hospitalized patients, which is natural.  
52  
53  
54  
55  
56  
57  
58  
59  
60

1  
2  
3 Thereby, an improved referral system from a district-level hospital to a tertiary level or  
4  
5 specialized hospital could be considered for high-risk patients, which might reduce mortality.  
6  
7

8  
9 Despite all efforts, our work had certain limitations. Based on our available resources and  
10  
11 government priority, we conducted this surveillance at only four hospitals in different  
12  
13 locations and enrolled suspected patients for three months only, with an additional one-month  
14  
15 follow-up period. Thus, our findings might not be generalized for the whole Bangladeshi  
16  
17 population. Moreover, we might have missed the true prevalence of COVID-19 patients as  
18  
19 we did not screen any asymptomatic patients. We only reported hospital-based prevalence  
20  
21 because it was beyond the scope of this platform to estimate the community burden of  
22  
23 COVID-19 in Bangladesh.  
24  
25  
26  
27

## 28 **Conclusion**

29  
30 Of the patients attending the surveillance hospitals with COVID-19 symptoms during the  
31  
32 reporting period, more than one-third had a laboratory-confirmed COVID-19 and, this was  
33  
34 more common among outpatients with peak positivity in July. Elderly population, shortness  
35  
36 of breath, co-morbid condition, smoking history, severe illness requiring hospital treatment  
37  
38 were identified as the factors associated with death among COVID-19 patients. Policymakers  
39  
40 may consider a system for the early identification of the COVID-19 positive individuals at  
41  
42 high risk to provide special care with time appropriate treatment. Our effort strengthened  
43  
44 government's capacity for rapid case detection, reporting, and quick containment efforts.  
45  
46 Continuing this sentinel surveillance platform can better characterize disease patterns in  
47  
48 populations over time, thus support the government by assessing the magnitude of the health  
49  
50 problem and developing a data-driven effective management strategy as well as can monitor  
51  
52 the progress towards the reduction of COVID-19 cases after vaccination campaign for SARS-  
53  
54 CoV-2.  
55  
56  
57  
58  
59  
60

1  
2  
3  
4  
5  
6  
7  
8  
9  
10  
11  
12  
13  
14  
15  
16  
17  
18  
19  
20  
21  
22  
23  
24  
25  
26  
27  
28  
29  
30  
31  
32  
33  
34  
35  
36  
37  
38  
39  
40  
41  
42  
43  
44  
45  
46  
47  
48  
49  
50  
51  
52  
53  
54  
55  
56  
57  
58  
59  
60

For peer review only



1  
2  
3 **Contributors:** The study concept was developed by FC and PD. The protocol was drafted by  
4  
5 PD and critically revised by FC, SB, MR (Mahmudur Rahman), MR (Mahbubur Rahman),  
6  
7 AA, TS, and MF. Data extraction and quality assessment was performed by ZA, SM AI and  
8  
9 PD. Laboratory aspect was managed by ZR and MR (Mustafizur Rahman). PD developed the  
10  
11 first draft manuscript. MR (Mahbubur Rahman), MB, SB, and all other authors provided  
12  
13 feedback for all sections of the protocol including the design, analysis and revising the  
14  
15 manuscript. All authors have approved the final version of the manuscript.  
16  
17

18  
19 **Data availability statement:** Data cannot be made publicly available because these are  
20  
21 confidential. Data are available from the respective department of icddr,b ([www.icddr.org](http://www.icddr.org))  
22  
23 for researchers who meet the criteria for access to confidential data.  
24  
25

26 **Data sharing statement:** No additional data available.  
27

28 **Disclaimer:** Our funding sources had no role in the design of the protocol, and was not  
29  
30 involved during the methodological execution, data analyses and interpretation and decision  
31  
32 to submit or to publish the study results.  
33  
34

35  
36 **Patient and public involvement:** Due to the design of this study, it was not appropriate to  
37  
38 involve patients and/or the public themselves in the design, or conduct, or reporting, or  
39  
40 dissemination plans of this research.  
41  
42

43 **Ethics statements:** The protocol was reviewed and approved by the institutional review  
44  
45 boards (IRB; Research Review Committee and Ethical Review Committee) of the  
46  
47 International Centre for Diarrhoeal Disease Research, Bangladesh (icddr,b). We obtained  
48  
49 written, informed consent of the participants before enrollment.  
50  
51

52  
53 **Funding:** This research protocol was funded by The Foreign, Commonwealth &  
54  
55 Development Office (FCDO – former DFID) of the UK Government (01831) and the United  
56  
57 States Agency for International Development (USAID) under the terms of USAID's Alliance  
58  
59  
60

1  
2  
3 for Combating TB in Bangladesh activity cooperative agreement no. CA #  
4  
5 72038820CA00002.  
6  
7

8 **Acknowledgement:** This research protocol was funded by The Foreign, Commonwealth &  
9  
10 Development Office (FCDO – former DFID) of the UK Government and the United States  
11  
12 Agency for International Development (USAID) under the terms of USAID’s Alliance for  
13  
14 Combating TB in Bangladesh activity cooperative agreement no. CA # 72038820CA00002.  
15  
16 Views expressed herein do not necessarily reflect the views of the U.S. Government or  
17  
18 USAID. icddr,b acknowledges with gratitude the commitment of FCDO and USAID to its  
19  
20 research efforts. icddr,b is also grateful to the Governments of Bangladesh, Canada, Sweden  
21  
22 and the UK for providing core/unrestricted support.  
23  
24  
25  
26

27 **Conflicts of Interest:** The authors declare no conflict of interest.  
28  
29  
30  
31  
32  
33  
34  
35  
36  
37  
38  
39  
40  
41  
42  
43  
44  
45  
46  
47  
48  
49  
50  
51  
52  
53  
54  
55  
56  
57  
58  
59  
60

## References

1. Cheng ZJ, Shan J. 2019 Novel coronavirus: where we are and what we know. *Infection*. 2020;48(2):155-163. doi:10.1007/s15010-020-01401-y
2. Worldometer. Coronavirus Update (Live): Cases and Deaths from COVID-19 Virus Pandemic. Accessed April 1, 2021. <https://www.worldometers.info/coronavirus/>
3. Huang C, Wang Y, Li X, et al. Clinical features of patients infected with 2019 novel coronavirus in Wuhan, China. *Lancet*. Published online 2020. doi:10.1016/S0140-6736(20)30183-5
4. Leung C. Clinical features of deaths in the novel coronavirus epidemic in China. *Rev Med Virol*. 2020;30(3). doi:10.1002/rmv.2103
5. Hassan SA, Sheikh FN, Jamal S, Ezeh JK, Akhtar A. Coronavirus (COVID-19): A Review of Clinical Features, Diagnosis, and Treatment. *Cureus*. Published online March 2020. doi:10.7759/cureus.7355
6. Oran DP, Topol EJ. Prevalence of Asymptomatic SARS-CoV-2 Infection : A Narrative Review. *Ann Intern Med*. Published online 2020. doi:10.7326/M20-3012
7. WHO Timeline - COVID-19.
8. COVID-19 Map - Johns Hopkins Coronavirus Resource Center. Accessed March 25, 2020. <https://coronavirus.jhu.edu/map.html>
9. The first few X cases and contacts (FFX) investigation protocol for coronavirus disease 2019 (COVID-19), version 2.2. Accessed November 15, 2020. [https://www.who.int/publications/i/item/the-first-few-x-cases-and-contacts-\(-ffx\)-investigation-protocol-for-coronavirus-disease-2019-\(-covid-19\)-version-2.2](https://www.who.int/publications/i/item/the-first-few-x-cases-and-contacts-(-ffx)-investigation-protocol-for-coronavirus-disease-2019-(-covid-19)-version-2.2)
10. Ahmed M, Aleem MA, Roguski K, et al. Estimates of seasonal influenza-associated mortality in Bangladesh, 2010-2012. *Influenza Other Respi Viruses*. Published online 2018. doi:10.1111/irv.12490
11. Zaman RU, Alamgir ASM, Rahman M, et al. Influenza in outpatient ILI case-patients in national hospital-based surveillance, Bangladesh, 2007-2008. *PLoS One*. Published online 2009. doi:10.1371/journal.pone.0008452
12. Islam MT, Talukder AK, Siddiqui MN, Islam T. Tackling the COVID-19 pandemic: the Bangladesh perspective. *J Public Health Res*. Published online 2020. doi:10.4081/jphr.2020.1794
13. Bangladesh Coronavirus: 430,496 Cases and 6,173 Deaths - Worldometer. Accessed November 15, 2020. <https://www.worldometers.info/coronavirus/country/bangladesh/>
14. WHO. Updated WHO recommendations for international traffic in relation to COVID-19 outbreak. Accessed September 2, 2021. <https://www.who.int/news-room/articles-detail/updated-who-recommendations-for-international-traffic-in-relation-to-covid-19-outbreak>
15. MA M. Exploring factors in fear of COVID-19 and its GIS-based nationwide distribution: the case of Bangladesh. *BJPsych open*. 2021;7(5). doi:10.1192/BJO.2021.984
16. S M-E-M, MZ H, MAAJ B, et al. Use of Antimicrobials among Suspected COVID-19 Patients at

- 1  
2  
3 Selected Hospitals, Bangladesh: Findings from the First Wave of COVID-19 Pandemic. *Antibiot*  
4 *(Basel, Switzerland)*. 2021;10(6). doi:10.3390/ANTIBIOTICS10060738  
5
- 6 17. Covid-19 tests: Technicians to be trained on PCR machines. Accessed September 2, 2021.  
7 [https://thefinancialexpress.com.bd/health/covid-19-tests-technicians-to-be-trained-on-pcr-](https://thefinancialexpress.com.bd/health/covid-19-tests-technicians-to-be-trained-on-pcr-machines-1585971746)  
8 [machines-1585971746](https://thefinancialexpress.com.bd/health/covid-19-tests-technicians-to-be-trained-on-pcr-machines-1585971746)  
9
- 10 18. Summ ML-MS, 2012 undefined. Global health surveillance. *cdc.gov*. Accessed September 23,  
11 2021. <https://www.cdc.gov/mmWR/preview/mmwrhtml/su6103a4.htm>  
12
- 13 19. Ibrahim NK. Epidemiologic surveillance for controlling Covid-19 pandemic: types, challenges  
14 and implications. *J Infect Public Health*. 2020;13(11):1630-1638.  
15 doi:10.1016/J.JIPH.2020.07.019  
16
- 17 20. Ng Y, Li Z, Chua YX, et al. Evaluation of the Effectiveness of Surveillance and Containment  
18 Measures for the First 100 Patients with COVID-19 in Singapore — January 2–February 29,  
19 2020. *MMWR Morb Mortal Wkly Rep*. 2020;69(11):307-311. doi:10.15585/mmwr.mm6911e1  
20  
21
- 22 21. Pung R, Chiew CJ, Young BE, et al. Investigation of three clusters of COVID-19 in Singapore:  
23 implications for surveillance and response measures. *Lancet*. 2020;395(10229):1039-1046.  
24 doi:10.1016/S0140-6736(20)30528-6  
25
- 26 22. COVID-19 Bangladesh situation reports. WHO Bangladesh. Accessed September 23, 2021.  
27 [https://cdn.who.int/media/docs/default-source/searo/bangladesh/covid-19-who-](https://cdn.who.int/media/docs/default-source/searo/bangladesh/covid-19-who-bangladesh-situation-reports/who-covid-19-update-29-20200914.pdf?sfvrsn=bd0e839f_2)  
28 [bangladesh-situation-reports/who-covid-19-update-29-20200914.pdf?sfvrsn=bd0e839f\\_2](https://cdn.who.int/media/docs/default-source/searo/bangladesh/covid-19-who-bangladesh-situation-reports/who-covid-19-update-29-20200914.pdf?sfvrsn=bd0e839f_2)  
29
- 30 23. Kushwaha S, Khanna P, Rajagopal V, Kiran T. Biological attributes of age and gender variations  
31 in Indian COVID-19 cases: A retrospective data analysis. *Clin Epidemiol Glob Heal*. 2021;11.  
32 doi:10.1016/J.CEGH.2021.100788  
33
- 34 24. Ahmed SM, Adams AM, Chowdhury M, Bhuiya A. Gender, socioeconomic development and  
35 health-seeking behaviour in Bangladesh. *Soc Sci Med*. Published online 2000.  
36 doi:10.1016/S0277-9536(99)00461-X  
37
- 38 25. More men than women dying in BD from coronavirus. Accessed November 24, 2020.  
39 [https://www.thefinancialexpress.com.bd/national/more-men-than-women-dying-in-bd-](https://www.thefinancialexpress.com.bd/national/more-men-than-women-dying-in-bd-from-coronavirus-1587215821)  
40 [from-coronavirus-1587215821](https://www.thefinancialexpress.com.bd/national/more-men-than-women-dying-in-bd-from-coronavirus-1587215821)  
41  
42
- 43 26. Chatterjee P, Anand T, Singh K, et al. Healthcare workers & SARS-CoV-2 infection in India: A  
44 case-control investigation in the time of COVID-19. *Indian J Med Res*. Published online 2020.  
45 doi:10.4103/ijmr.IJMR\_2234\_20  
46
- 47 27. Hassan MZ, Monjur MR, Styczynski AR. Protecting front line health care workers should be  
48 the top priority in low-resource health systems: Case of Bangladesh. *Infect Control Hosp*  
49 *Epidemiol*. Published online 2020:1. doi:10.1017/ice.2020.208  
50
- 51 28. Yasmin R, Parveen R, Azad N Al, et al. Corona Virus Infection among Healthcare Workers in a  
52 COVID Dedicated Tertiary Care Hospital in Dhaka, Bangladesh. *J Bangladesh Coll Physicians*  
53 *Surg*. Published online 2020. doi:10.3329/jbcps.v38i0.47442  
54
- 55 29. COVID-19 Dashboard, Bangladesh. Accessed September 23, 2021.  
56 <http://dashboard.dghs.gov.bd/webportal/pages/covid19.php>  
57
- 58 30. Bangladesh: WHO Coronavirus Disease (COVID-19) Dashboard With Vaccination Data | WHO  
59 Coronavirus (COVID-19) Dashboard With Vaccination Data. Accessed September 23, 2021.  
60

- 1  
2  
3  
4  
5  
6  
7  
8  
9  
10  
11  
12  
13  
14  
15  
16  
17  
18  
19  
20  
21  
22  
23  
24  
25  
26  
27  
28  
29  
30  
31  
32  
33  
34  
35  
36  
37  
38  
39  
40  
41  
42  
43  
44  
45  
46  
47  
48  
49  
50  
51  
52  
53  
54  
55  
56  
57  
58  
59  
60
- <https://covid19.who.int/region/searo/country/bd>
31. Huq S, Biswas RK. COVID-19 in Bangladesh: Data deficiency to delayed decision. *J Glob Health*. 2020;10(1). doi:10.7189/jogh.10.010342
32. Manabe T, Akatsu H, Kotani K, Kudo K. Trends in clinical features of novel coronavirus disease (COVID-19): A systematic review and meta-analysis of studies published from December 2019 to February 2020. *Respir Investig*. 2020;58(5):409-418. doi:10.1016/j.resinv.2020.05.005
33. Yang W, Cao Q, Qin L, et al. Clinical characteristics and imaging manifestations of the 2019 novel coronavirus disease (COVID-19): A multi-center study in Wenzhou city, Zhejiang, China. *J Infect*. Published online 2020. doi:10.1016/j.jinf.2020.02.016
34. Rodriguez-Morales AJ, Cardona-Ospina JA, Gutiérrez-Ocampo E, et al. Clinical, laboratory and imaging features of COVID-19: A systematic review and meta-analysis. *Travel Med Infect Dis*. Published online 2020. doi:10.1016/j.tmaid.2020.101623
35. Cen Y, Chen X, Shen Y, et al. Risk factors for disease progression in patients with mild to moderate coronavirus disease 2019—a multi-centre observational study. *Clin Microbiol Infect*. Published online 2020. doi:10.1016/j.cmi.2020.05.041
36. Shi Q, Zhang X, Jiang F, et al. Clinical Characteristics and Risk Factors for Mortality of COVID-19 Patients With Diabetes in Wuhan, China: A Two-Center, Retrospective Study. *Diabetes Care*. 2020;43(7):1382-1391. doi:10.2337/dc20-0598
37. Livingston E, Bucher K. Coronavirus Disease 2019 (COVID-19) in Italy. *JAMA*. Published online 2020. doi:10.1001/jama.2020.4344
38. MIS, DGHS, Bangladesh. Accessed January 2, 2021. <https://dghs.gov.bd/index.php/bd/component/content/article?layout=edit&id=5612>
39. Chen R, Liang W, Jiang M, et al. Risk Factors of Fatal Outcome in Hospitalized Subjects With Coronavirus Disease 2019 From a Nationwide Analysis in China. *Chest*. 2020;158(1):97-105. doi:10.1016/j.chest.2020.04.010
40. Wu Z, McGoogan JM. Characteristics of and Important Lessons from the Coronavirus Disease 2019 (COVID-19) Outbreak in China: Summary of a Report of 72314 Cases from the Chinese Center for Disease Control and Prevention. *JAMA - J Am Med Assoc*. Published online 2020. doi:10.1001/jama.2020.2648
41. Public Health England. Seasonal flu vaccine uptake in GP patients: winter 2018 to 2019 - GOV.UK. Accessed November 25, 2020. <https://www.gov.uk/government/statistics/seasonal-flu-vaccine-uptake-in-gp-patients-winter-2018-to-2019>
42. Huang R, Zhuid L, Xue L, et al. Clinical findings of patients with coronavirus disease 2019 in Jiangsu Province, China: A retrospective, multi-center study. *PLoS Negl Trop Dis*. Published online 2020. doi:10.1371/journal.pntd.0008280
43. Wang D, Hu B, Hu C, et al. Clinical Characteristics of 138 Hospitalized Patients with 2019 Novel Coronavirus-Infected Pneumonia in Wuhan, China. *JAMA - J Am Med Assoc*. Published online 2020. doi:10.1001/jama.2020.1585
44. Guo FR. Smoking links to the severity of COVID-19: An update of a meta-analysis. *J Med Virol*. 2020;92(11):2304-2305. doi:10.1002/jmv.25967

- 1  
2  
3 45. Vardavas CI, Nikitara K. COVID-19 and smoking: A systematic review of the evidence. *Tob*  
4 *Induc Dis*. Published online 2020. doi:10.18332/tid/119324  
5  
6 46. Smoking and COVID-19. WHO. Accessed January 2, 2021. [https://www.who.int/news-](https://www.who.int/news-room/commentaries/detail/smoking-and-covid-19)  
7 [room/commentaries/detail/smoking-and-covid-19](https://www.who.int/news-room/commentaries/detail/smoking-and-covid-19)  
8  
9 47. Patanavanich R, Glantz SA. Smoking Is Associated With COVID-19 Progression: A Meta-  
10 analysis. *Nicotine Tob Res*. Published online 2020. doi:10.1093/ntr/ntaa082  
11  
12  
13  
14  
15  
16  
17  
18  
19  
20  
21  
22  
23  
24  
25  
26  
27  
28  
29  
30  
31  
32  
33  
34  
35  
36  
37  
38  
39  
40  
41  
42  
43  
44  
45  
46  
47  
48  
49  
50  
51  
52  
53  
54  
55  
56  
57  
58  
59  
60

For peer review only

**Table 1.** Socio-demographic characteristics of suspected COVID-19 patients in selected hospitals of Bangladesh, June-August 2020

| Characteristics       | Suspected COVID-19 patients (N=2345) | SARS-CoV-2 Positive by rRT-PCR |                      |                         |
|-----------------------|--------------------------------------|--------------------------------|----------------------|-------------------------|
|                       |                                      | Total Positive (922)           | Inpatient (57) n (%) | Out-patient (865) n (%) |
| <b>Age (in years)</b> |                                      |                                |                      |                         |
| Median (IQR)          | 35 (26-48)                           | 38 (30-50)                     | 55 (45-69)           | 38 (29-48)              |
| <b>Age sub-groups</b> |                                      |                                |                      |                         |
| 0-5                   | 25 (1.11)                            | 6 (0.7)                        | 1 (1.7)              | 5 (0.6)                 |
| 6-10                  | 30 (1.3)                             | 11 (1.2)                       | 0 (0)                | 11 (1.3)                |
| 11-20                 | 167 (7.1)                            | 42 (4.5)                       | 0 (0)                | 42 (4.8)                |
| 21-30                 | 684 (29.1)                           | 228 (24.7)                     | 5 (8.7)              | 223 (25.8)              |
| 31-40                 | 594 (25.3)                           | 246 (26.6)                     | 6 (10.5)             | 240 (27.7)              |
| 41-50                 | 382 (16.3)                           | 182 (19.7)                     | 11 (19.3)            | 171 (19.7)              |
| 51-60                 | 267 (11.4)                           | 125 (13.5)                     | 8 (14.0)             | 117 (13.5)              |
| 60+                   | 196 (8.3)                            | 82 (8.8)                       | 26 (45.6)            | 56 (6.5)                |
| <b>Sex</b>            |                                      |                                |                      |                         |
| Male                  | 1590 (67.8)                          | 654 (70.9)                     | 38 (66.7)            | 616 (71.2)              |
| Female                | 755 (32.2)                           | 268 (29.1)                     | 19 (33.3)            | 249 (28.8)              |
| <b>Occupation</b>     |                                      |                                |                      |                         |
| HCW                   | 302 (12.9)                           | 83 (9.0)                       | 2 (3.5)              | 81 (9.4)                |
| Service               | 946 (40.3)                           | 431 (46.8)                     | 7 (12.3)             | 424 (49.0)              |
| Business              | 154 (6.6)                            | 82 (8.9)                       | 6 (10.5)             | 76 (8.8)                |
| Student               | 223 (9.5)                            | 68 (7.4)                       | 0 (0)                | 68 (7.9)                |
| Dependent             | 215 (9.1)                            | 73 (7.9)                       | 22 (38.6)            | 51 (5.9)                |
| Unemployed            | 145 (6.1)                            | 64 (6.9)                       | 9 (15.8)             | 55 (6.3)                |

|                     |             |            |           |            |
|---------------------|-------------|------------|-----------|------------|
| Others*             | 360 (15.3)  | 121 (13.1) | 11 (19.3) | 110 (12.7) |
| Education (years)   |             |            |           |            |
| No formal schooling | 155 (6.6)   | 44 (4.8)   | 11 (19.3) | 33 (3.8)   |
| 1-5                 | 255 (10.9)  | 89 (9.7)   | 11 (19.3) | 78 (9.0)   |
| 6-10                | 496 (21.2)  | 178 (19.3) | 22 (38.6) | 156 (18.0) |
| 11-12               | 367 (15.7)  | 144 (15.6) | 7 (12.3)  | 137 (15.8) |
| >12                 | 1072 (45.6) | 467 (50.7) | 6 (10.5)  | 461 (53.4) |

\*Farmer, day-labour, small shop owner, rickshaw/van puller, driver etc.

**Table 2.** Factors associated with adverse outcome (death) among COVID-19 positive patients in selected hospitals of Bangladesh, June-August 2020.

| Factors              | Frequency<br>N=922 | Death<br>n=21<br>Frequency (%) | Odds ratio<br>OR (95% CI) | Adjusted odds<br>ratio<br>AOR (95% CI) |
|----------------------|--------------------|--------------------------------|---------------------------|----------------------------------------|
| Age*                 | 0-59 years         | 812                            | 8 (1%)                    | 1                                      |
|                      | ≥ 60 years         | 110                            | 13 (11.8%)                | 13.5 (5.4-33.3)                        |
| Sex                  | Male               | 654                            | 14 (2.1%)                 | 1                                      |
|                      | Female             | 268                            | 7 (2.6%)                  | 1.2 (0.5-3.0)                          |
| Health care worker   | Yes                | 83                             | 0 (0%)                    | 1                                      |
|                      | No                 | 839                            | 21 (2.5%)                 | -                                      |
| Symptoms             | ≤3 symptoms        | 314                            | 7 (2.2%)                  | 1                                      |
|                      | >3 symptoms        | 608                            | 14 (2.3%)                 | 1.0 (0.4-2.5)                          |
| Shortness of breath* | No                 | 700                            | 4 (0.6%)                  | 1                                      |
|                      | Yes                | 222                            | 17 (7.7%)                 | 14.4 (4.8-43)                          |
| Comorbidity*         | No                 | 538                            | 2 (0.4%)                  | 1                                      |
|                      | Yes                | 384                            | 19 (4.9%)                 | 13.9 (3.2-60)                          |
| History of smoking   | No                 | 812                            | 14 (1.7%)                 | 1                                      |
|                      | Yes                | 110                            | 7 (6.4%)                  | 3.9 (1.5-9.8)                          |
| Treatment received*  | OPD                | 865                            | 12 (1.4%)                 | 1                                      |
|                      | inpatient          | 57                             | 9 (15.8%)                 | 13.3 (5.3-33)                          |



|                      |          |     |           |                |                |
|----------------------|----------|-----|-----------|----------------|----------------|
| Duration of hospital | ≥ 2 days | 880 | 17 (1.9%) | 1              | 1              |
| attendance from the  | < 2 days | 42  | 4 (9.8%)  | 5.4 (1.8-17.1) | 4.7 (1.2-17.8) |
| onset of symptom*    |          |     |           |                |                |

*\*Factors with a significant difference between groups*

For peer review only

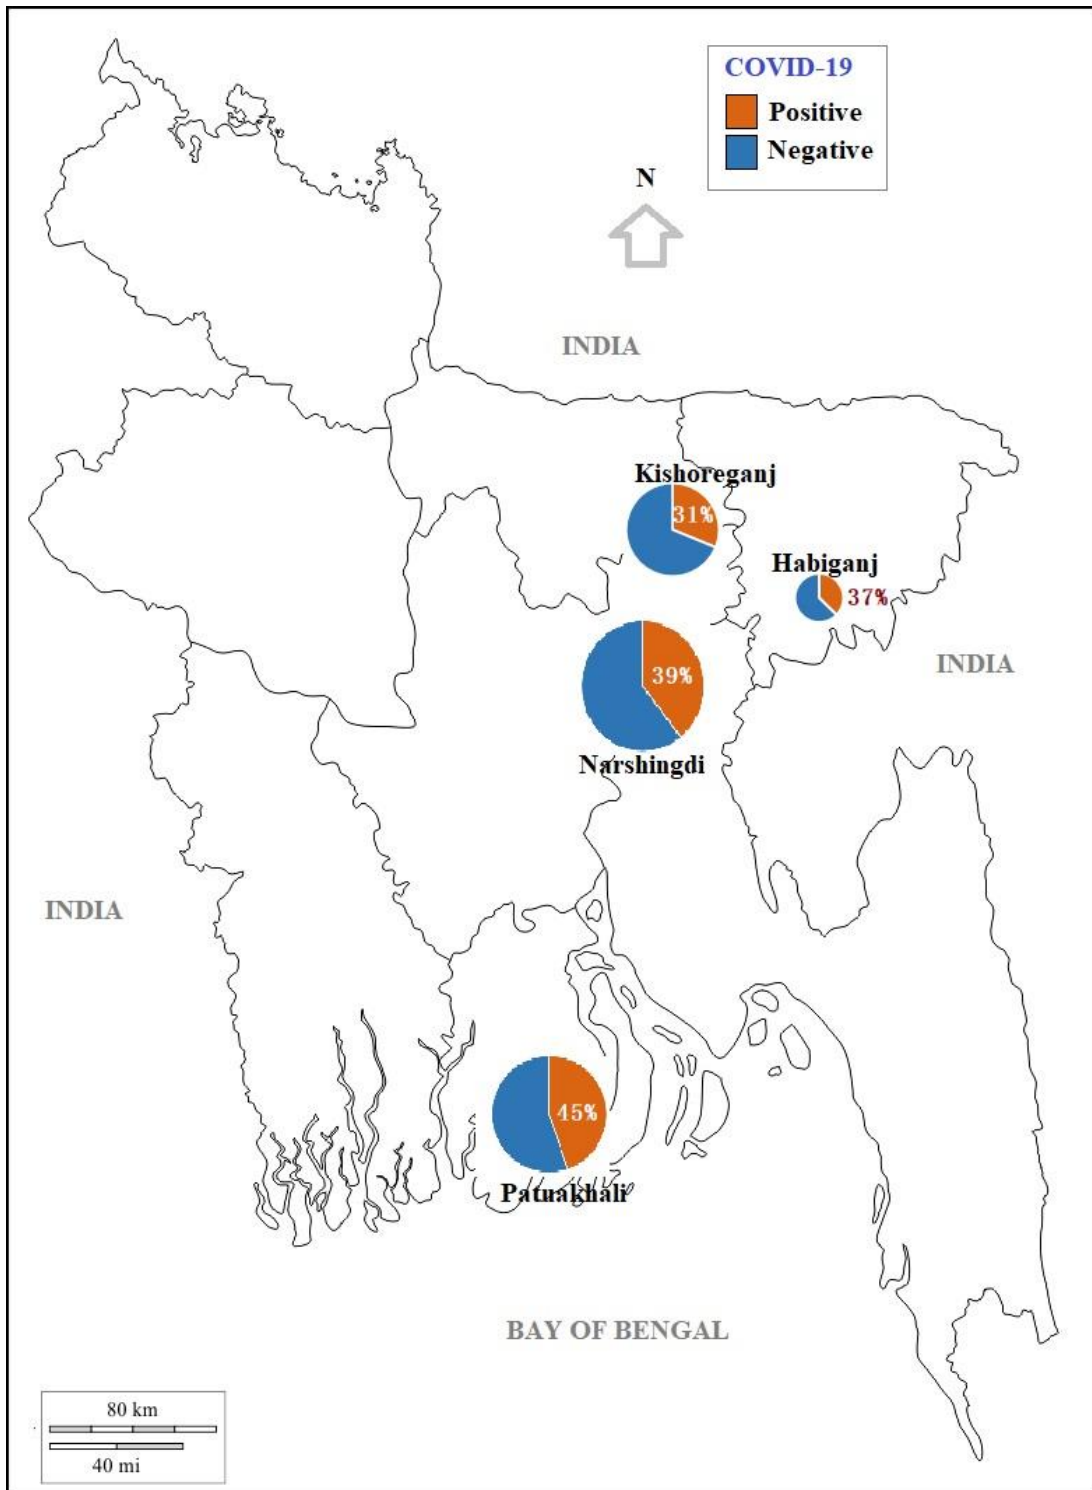



only

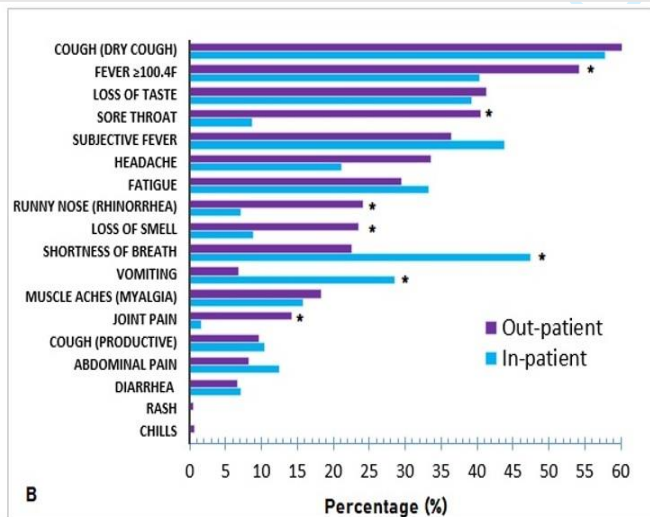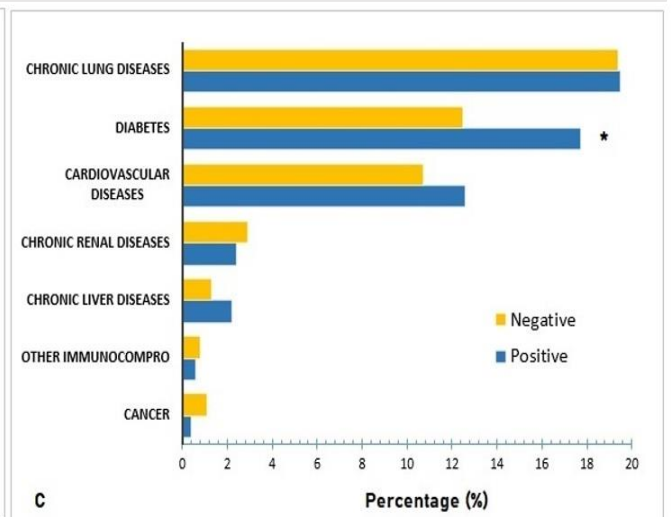

**Supplementary table 1.** Distribution of deaths among COVID-19 positive patients in selected hospitals of Bangladesh, June-August 2020.

|                                                           | <b>Hospital death</b><br>n= 16 | <b>Home death</b><br>n=5       |
|-----------------------------------------------------------|--------------------------------|--------------------------------|
| <b>Age (years)</b>                                        |                                |                                |
| Lowest, highest                                           | 40, 85                         | 51, 90                         |
| Median (IQR)                                              | 65 (55-69)                     | 64 (52-70)                     |
| <b>Sex</b>                                                |                                |                                |
| Male                                                      | 11 (69)                        | 3 (60)                         |
| <b>Timing of death from symptom onset</b>                 |                                |                                |
| 0-7 days                                                  | 6 (38) 6 (38) Cum.             | 3 (60) 3 (60) Cum.             |
| 8-15 days                                                 | 9 (56) 15 (94)                 | 2 (40) 5 (100)                 |
| 16-40 days                                                | 1 (6) 16 (100)                 |                                |
| <b>Manner of death</b>                                    |                                |                                |
| Disease                                                   | 16                             | 5 (100)                        |
| Accident                                                  | 0                              | 0                              |
| Sudden death (heart attack)                               | 0                              | 0                              |
| <b>Comorbidity present (anyone)</b>                       |                                |                                |
|                                                           | 15 (94%)                       | 4 (80)                         |
| DM                                                        | 9 (56)                         | 2 (40)                         |
| Asthma/COPD                                               | 4 (25)                         | 2 (40)                         |
| Heart disease/HTN                                         | 6 (37)                         | 2 (40)                         |
| Chronic renal disease                                     | 4 (25)                         | 0                              |
| Cancer (uterine)                                          | 1 (6)                          | 0                              |
| <b>Clinical course of treatment</b>                       |                                |                                |
| Oxygen required                                           | 16 (100)                       | 3 (60) [ 2 got oxygen at home] |
| ICU admitted                                              | 3 (19)                         |                                |
| CCU admitted                                              | 1 (6)                          |                                |
| Dialysis required                                         | 1 (6)                          |                                |
| <b>Cause of death as stated from hospital as reported</b> |                                |                                |
| COVID-19 + Respiratory failure                            | 14 (88)                        |                                |
| Pneumonia                                                 | 1 (6)                          |                                |
| Chronic renal failure                                     | 1 (6)                          |                                |

STROBE Statement—Checklist of items that should be included in reports of *cross-sectional studies*

|                              | Item No | Recommendation                                                                                                                                                                                               | Page No |
|------------------------------|---------|--------------------------------------------------------------------------------------------------------------------------------------------------------------------------------------------------------------|---------|
| <b>Title and abstract</b>    | 1       | (a) Indicate the study's design with a commonly used term in the title or the abstract                                                                                                                       | 1       |
|                              |         | (b) Provide in the abstract an informative and balanced summary of what was done and what was found                                                                                                          | 1       |
| <b>Introduction</b>          |         |                                                                                                                                                                                                              |         |
| Background/rationale         | 2       | Explain the scientific background and rationale for the investigation being reported                                                                                                                         | 4-5     |
| Objectives                   | 3       | State specific objectives, including any prespecified hypotheses                                                                                                                                             | 5       |
| <b>Methods</b>               |         |                                                                                                                                                                                                              |         |
| Study design                 | 4       | Present key elements of study design early in the paper                                                                                                                                                      | 6       |
| Setting                      | 5       | Describe the setting, locations, and relevant dates, including periods of recruitment, exposure, follow-up, and data collection                                                                              | 6-7     |
| Participants                 | 6       | (a) Give the eligibility criteria, and the sources and methods of selection of participants                                                                                                                  | 6       |
| Variables                    | 7       | Clearly define all outcomes, exposures, predictors, potential confounders, and effect modifiers. Give diagnostic criteria, if applicable                                                                     | 8       |
| Data sources/<br>measurement | 8*      | For each variable of interest, give sources of data and details of methods of assessment (measurement). Describe comparability of assessment methods if there is more than one group                         | NA      |
| Bias                         | 9       | Describe any efforts to address potential sources of bias                                                                                                                                                    | NA      |
| Study size                   | 10      | Explain how the study size was arrived at                                                                                                                                                                    | NA      |
| Quantitative variables       | 11      | Explain how quantitative variables were handled in the analyses. If applicable, describe which groupings were chosen and why                                                                                 | 7       |
| Statistical methods          | 12      | (a) Describe all statistical methods, including those used to control for confounding                                                                                                                        | 7       |
|                              |         | (b) Describe any methods used to examine subgroups and interactions                                                                                                                                          | 7       |
|                              |         | (c) Explain how missing data were addressed                                                                                                                                                                  | NA      |
|                              |         | (d) If applicable, describe analytical methods taking account of sampling strategy                                                                                                                           |         |
|                              |         | (e) Describe any sensitivity analyses                                                                                                                                                                        |         |
| <b>Results</b>               |         |                                                                                                                                                                                                              |         |
| Participants                 | 13*     | (a) Report numbers of individuals at each stage of study—eg numbers potentially eligible, examined for eligibility, confirmed eligible, included in the study, completing follow-up, and analysed            | 8       |
|                              |         | (b) Give reasons for non-participation at each stage                                                                                                                                                         | NA      |
|                              |         | (c) Consider use of a flow diagram                                                                                                                                                                           | NA      |
| Descriptive data             | 14*     | (a) Give characteristics of study participants (eg demographic, clinical, social) and information on exposures and potential confounders                                                                     | 8-9     |
|                              |         | (b) Indicate number of participants with missing data for each variable of interest                                                                                                                          | NA      |
| Outcome data                 | 15*     | Report numbers of outcome events or summary measures                                                                                                                                                         | 7-10    |
| Main results                 | 16      | (a) Give unadjusted estimates and, if applicable, confounder-adjusted estimates and their precision (eg, 95% confidence interval). Make clear which confounders were adjusted for and why they were included | 10      |

|                          |    |                                                                                                                                                                            |       |
|--------------------------|----|----------------------------------------------------------------------------------------------------------------------------------------------------------------------------|-------|
|                          |    | (b) Report category boundaries when continuous variables were categorized                                                                                                  | NA    |
|                          |    | (c) If relevant, consider translating estimates of relative risk into absolute risk for a meaningful time period                                                           |       |
| Other analyses           | 17 | Report other analyses done—eg analyses of subgroups and interactions, and sensitivity analyses                                                                             | NA    |
| <b>Discussion</b>        |    |                                                                                                                                                                            |       |
| Key results              | 18 | Summarise key results with reference to study objectives                                                                                                                   | 10-15 |
| Limitations              | 19 | Discuss limitations of the study, taking into account sources of potential bias or imprecision. Discuss both direction and magnitude of any potential bias                 | 15    |
| Interpretation           | 20 | Give a cautious overall interpretation of results considering objectives, limitations, multiplicity of analyses, results from similar studies, and other relevant evidence | 16    |
| Generalisability         | 21 | Discuss the generalisability (external validity) of the study results                                                                                                      | 15    |
| <b>Other information</b> |    |                                                                                                                                                                            |       |
| Funding                  | 22 | Give the source of funding and the role of the funders for the present study and, if applicable, for the original study on which the present article is based              | 16    |

\*Give information separately for exposed and unexposed groups.

**Note:** An Explanation and Elaboration article discusses each checklist item and gives methodological background and published examples of transparent reporting. The STROBE checklist is best used in conjunction with this article (freely available on the Web sites of PLoS Medicine at <http://www.plosmedicine.org/>, Annals of Internal Medicine at <http://www.annals.org/>, and Epidemiology at <http://www.epidem.com/>). Information on the STROBE Initiative is available at [www.strobe-statement.org](http://www.strobe-statement.org).
