# Supplementary material for: Establishing a sentinel surveillance system for the novel COVID-19 in a resource-limited country: methods, system attributes and early findings
Source: PubMed Central journal article supplement — BMJ Open. 2021 Dec 2;11(12):e055169. doi: 10.1136/bmjopen-2021-055169 (PMC8640197; doi:10.1136/bmjopen-2021-055169), 2021-12-02
Supplement: bmjopen-2021-055169supp001.pdf [file bmjopen-2021-055169supp001.pdf]

**Supplementary table 1.** Distribution of deaths among COVID-19 positive patients in selected hospitals of Bangladesh, June-August 2020.

|                                                           | <b>Hospital death<br/>n= 16</b> | <b>Home death<br/>n=5</b>      |
|-----------------------------------------------------------|---------------------------------|--------------------------------|
| <b>Age (years)</b>                                        |                                 |                                |
| Lowest, highest                                           | 40, 85                          | 51, 90                         |
| Median (IQR)                                              | 65 (55-69)                      | 64 (52-70)                     |
| <b>Sex</b>                                                |                                 |                                |
| Male                                                      | 11 (69)                         | 3 (60)                         |
| <b>Timing of death from symptom onset</b>                 |                                 |                                |
| 0-7 days                                                  | 6 (38)                          | 6 (38) Cum.                    |
| 8-15 days                                                 | 9 (56)                          | 15 (94)                        |
| 16-40 days                                                | 1 (6)                           | 16 (100)                       |
| <b>Manner of death</b>                                    |                                 |                                |
| Disease                                                   | 16                              | 5 (100)                        |
| Accident                                                  | 0                               | 0                              |
| Sudden death (heart attack)                               | 0                               | 0                              |
| <b>Comorbidity present (anyone)</b>                       |                                 |                                |
| DM                                                        | 15 (94%)                        | 4 (80)                         |
| Asthma/COPD                                               | 9 (56)                          | 2 (40)                         |
| Asthma/COPD                                               | 4 (25)                          | 2 (40)                         |
| Heart disease/HTN                                         | 6 (37)                          | 2 (40)                         |
| Chronic renal disease                                     | 4 (25)                          | 0                              |
| Cancer (uterine)                                          | 4 (25)                          | 0                              |
| <b>Clinical course of treatment</b>                       |                                 |                                |
| Oxygen required                                           | 16 (100)                        | 3 (60) [ 2 got oxygen at home] |
| ICU admitted                                              | 3 (19)                          |                                |
| CCU admitted                                              | 1 (6)                           |                                |
| Dialysis required                                         | 1 (6)                           |                                |
| <b>Cause of death as stated from hospital as reported</b> |                                 |                                |
| COVID-19 + Respiratory failure                            | 14 (88)                         |                                |
| Pneumonia                                                 | 1 (6)                           |                                |
| Chronic renal failure                                     | 1 (6)                           |                                |
